# Supplementary material for: Mid-Holocene Antarctic sea-ice increase driven by marine ice sheet retreat
Source: Copernicus journal article supplement (doi:10.5194/cp-2020-3), 2020-02-26
Supplement: Supplementary file 1 [file cp-2020-3-supplement.zip]

Archive with 6 entries (6 files):
- ADELIE SI CPD REFORMAT_without mendeley.pdf
- Data Table S1.xlsx
- Data Table S2.xlsx
- Movie_S1_SSS_diff_Ross01_ext.avi
- Movie_S2_SSS_diff_Ross05_ext.avi
- Movie_S3_SSS_diff_Ross1_ext.avi
