# Supplementary material for: Mid-Holocene Antarctic sea-ice increase driven by marine ice sheet retreat
Source: Copernicus journal article supplement (doi:10.5194/cp-2020-3), 2020-02-26
Supplement: Supplementary file 1 [file cp-2020-3-supplement.zip › Data Table S1.xlsx]

## Sheet: Sheet1
DEPTH to Age Lookup Table for U1357B - see note on depth scales to the right of this lookup table (rows L to R)
core	csf-a(mbsf)	csf-b(mbsf)	devoided depth (mbsf)	devoided depth (cmbsf)	min (cal yrs BP)	max (cal yrs BP)	median (cal yrs BP)	wmean (cal yrs BP)
1	1.76	1.76	1.76	176	-92.1	221.6	48.3	56.7
1	1.77	1.77	1.77	177	-91.8	222.2	48.8	57.3			This lookup table was generated using BACON using the following parameters:
1	1.78	1.78	1.78	178	-91.3	222.9	49.3	57.9			Bacon("U1357BRecompressed", cc=2, cc2="Marine13", mem.strength=8.5, thick=100, mem.mean=0.85, d.min=0, d.max=17000, MinYr=-200, MaxYr=11700, find.round=2, acc.mean=0.65, acc.shape=1.8, C14.border=rgb(0, 0, 0, 1), C14.col=rgb(0, 0, 1, 1))
1	1.79	1.79	1.79	179	-91	223.5	49.9	58.4
1	1.8	1.8	1.8	180	-90.3	224.2	50.5	59			The starting file was:
1	1.81	1.81	1.81	181	-90	225.1	51	59.5
1	1.82	1.82	1.82	182	-89.8	225.6	51.5	60.1			labID	age	error	depth	cc	d.R	d.STD
1	1.83	1.83	1.83	183	-89.3	226	52.1	60.7			159964	1310	30	0	2	800	100
1	1.84	1.84	1.84	184	-89	226.2	52.7	61.2			154732	1095	30	200.5	2	800	100
1	1.85	1.85	1.85	185	-88.6	226.8	53.4	61.8			155656	1340	35	247.5	2	800	100
1	1.86	1.86	1.86	186	-88.3	227.1	54.1	62.4			155657	1745	35	379.5	2	800	100
1	1.87	1.87	1.87	187	-87.9	227.4	54.6	63			154733	1405	30	596.5	2	800	100
1	1.88	1.88	1.88	188	-87.8	228.2	55.2	63.6			154734	1595	25	1074.5	2	800	100
1	1.89	1.89	1.89	189	-87.3	228.9	55.9	64.2			155488	1850	35	1289.39	2	800	100
1	1.9	1.9	1.9	190	-87	229.6	56.4	64.7			155659	2095	30	1316.45	2	800	100
1	1.91	1.91	1.91	191	-86.6	230.5	57.1	65.3			154712	2040	25	1456.59	2	800	100
1	1.92	1.92	1.92	192	-86.3	231.2	57.7	65.9			155489	2540	35	1584.16	2	800	100
1	1.93	1.93	1.93	193	-85.8	231.9	58.2	66.5			155660	2155	30	1745.55	2	800	100
1	1.94	1.94	1.94	194	-85.5	232.5	58.9	67.1			154713	2320	25	1905.98	2	800	100
1	1.95	1.95	1.95	195	-85.1	233.5	59.7	67.6			155719	2365	30	2143.72	2	800	100
1	1.96	1.96	1.96	196	-84.6	234.1	60.3	68.2			155718	2290	30	2253.85	2	800	100
1	1.97	1.97	1.97	197	-83.8	235.1	60.9	68.8			154714	2310	25	2447.57	2	800	100
1	1.98	1.98	1.98	198	-83.3	235.9	61.7	69.3			155490	2525	35	2544.44	2	800	100
1	1.99	1.99	1.99	199	-82.7	236.4	62.2	69.9			155717	2695	30	2703.7	2	800	100
1	2	2	2	200	-82.6	237.2	62.9	70.4			154715	2595	25	2935.61	2	800	100
1	2.01	2.01	2.01	201	-82.2	237.8	63.5	71.1			155491	2670	35	2993.36	2	800	100
1	2.02	2.02	2.02	202	-81.5	238.3	64	71.7			155661	3130	35	3182	2	800	100
1	2.03	2.03	2.03	203	-81	238.7	64.4	72.3			155716	3030	35	3400.33	2	800	100
1	2.04	2.04	2.04	204	-80.3	239	65.3	73			154716	2925	25	3620.61	2	800	100
1	2.05	2.05	2.05	205	-79.7	239.1	66	73.6			155662	3210	35	3773.93	2	800	100
1	2.06	2.06	2.06	206	-79.1	240	66.6	74.2			155663	3190	35	3843.79	2	800	100
1	2.07	2.07	2.07	207	-78.7	240	67.2	74.8			154735	3695	25	4155.5	2	800	100
1	2.08	2.08	2.08	208	-78	240.4	67.8	75.4			155664	3750	35	4298.5	2	800	100
1	2.09	2.09	2.09	209	-77.4	240.5	68.5	76.1			155665	3545	35	4365.5	2	800	100
1	2.1	2.1	2.1	210	-76.9	241.2	69.1	76.7			155751	4075	35	4477.5	2	800	100
1	2.11	2.11	2.11	211	-76.3	241.6	69.6	77.3			154736	3695	30	4729.5	2	800	100
1	2.12	2.12	2.12	212	-75.6	241.9	70.4	78			155666	4630	30	5147.5	2	800	100
1	2.13	2.13	2.13	213	-75.1	242.6	71	78.5			154737	4610	30	5288.5	2	800	100
1	2.14	2.14	2.14	214	-74	242.9	71.5	79.2			155736	4930	35	5552	2	800	100
1	2.15	2.15	2.15	215	-73.6	243.4	72.2	79.8			155735	4830	35	5648.5	2	800	100
1	2.16	2.16	2.16	216	-72.9	243.7	72.8	80.5			154738	5120	30	5957.5	2	800	100
1	2.17	2.17	2.17	217	-72.2	244.2	73.4	81.1			155734	5280	40	6296.5	2	800	100
1	2.18	2.18	2.18	218	-71.8	244.7	74.1	81.7			155733	5175	30	6485.5	2	800	100
1	2.19	2.19	2.19	219	-71.1	245	74.7	82.4			154739	5360	25	7009.5	2	800	100
1	2.2	2.2	2.2	220	-71.1	245.5	75.5	83			155732	5480	30	7326.5	2	800	100
1	2.21	2.21	2.21	221	-70.4	245.9	76.1	83.6			155731	5680	40	7491	2	800	100
1	2.22	2.22	2.22	222	-70	246.4	76.9	84.2			155730	5595	30	7632.5	2	800	100
1	2.23	2.23	2.23	223	-69.6	246.9	77.5	84.9			154740	5940	30	7940.5	2	800	100
1	2.24	2.24	2.24	224	-69.2	247.6	78.2	85.5			155750	5845	30	8074.5	2	800	100
1	2.25	2.25	2.25	225	-68.8	248.1	78.8	86.1			155729	5975	35	8252.5	2	800	100
1	2.26	2.26	2.26	226	-67.9	248.5	79.5	86.8			154741	6050	40	8545.5	2	800	100
1	2.27	2.27	2.27	227	-67.2	249.1	80.1	87.4			155728	6305	30	8832.5	2	800	100
1	2.28	2.28	2.28	228	-66.9	249.5	80.7	88			155727	6280	35	8939.5	2	800	100
1	2.29	2.29	2.29	229	-66.2	249.9	81.5	88.6			155726	6990	30	9169.5	2	800	100
1	2.3	2.3	2.3	230	-65.9	250.3	82.2	89.2			154717	6590	40	9333.5	2	800	100
1	2.31	2.31	2.31	231	-65.4	251	82.9	89.9			155725	6670	30	9526.5	2	800	100
1	2.32	2.32	2.32	232	-65	251.4	83.4	90.5			154718	6815	30	10035.5	2	800	100
1	2.33	2.33	2.33	233	-64.3	252	84.1	91.1			155749	7055	40	10247.5	2	800	100
1	2.34	2.34	2.34	234	-63.6	252.3	84.6	91.7			155748	7010	30	10451.5	2	800	100
1	2.35	2.35	2.35	235	-62.9	252.7	85.2	92.3			154719	7005	30	10483.5	2	800	100
1	2.36	2.36	2.36	236	-62.3	253.4	86	93			155747	7260	35	10713.5	2	800	100
1	2.37	2.37	2.37	237	-62.3	253.8	86.6	93.7			155492	7290	80	10752	2	800	100
1	2.38	2.38	2.38	238	-61.7	254.2	87.4	94.3			155746	7165	30	10866	2	800	100
1	2.39	2.39	2.39	239	-60.9	254.6	88.1	94.9			155745	7305	30	11007	2	800	100
1	2.4	2.4	2.4	240	-60	255.4	88.8	95.6			154720	7350	30	11195	2	800	100
1	2.41	2.41	2.41	241	-59.5	255.9	89.4	96.2			155744	7620	45	11356.5	2	800	100
1	2.42	2.42	2.42	242	-59.2	256.2	89.9	96.8			155743	7680	35	11566.5	2	800	100
1	2.43	2.43	2.43	243	-58.8	256.6	90.6	97.4			155742	8010	40	11727.5	2	800	100
1	2.44	2.44	2.44	244	-58.2	257.5	91.2	98.1			154721	8215	30	11944.5	2	800	100
1	2.45	2.45	2.45	245	-57.8	257.9	92	98.7			155741	8160	35	12087.5	2	800	100
1	2.46	2.46	2.46	246	-56.9	258.2	92.6	99.3			155740	8280	35	12263.5	2	800	100
1	2.47	2.47	2.47	247	-56.5	258.8	93.2	99.9			155872	8460	35	12400.5	2	800	100
1	2.48	2.48	2.48	248	-56.2	259.4	93.8	100.5			155873	8360	35	12667.5	2	800	100
1	2.49	2.49	2.49	249	-55.3	259.8	94.5	101.1			154722	8375	30	12862.5	2	800	100
2	2.5	2.5	2.5	250	-54.8	260.5	95.2	101.8			155874	8525	40	13219.5	2	800	100
2	2.51	2.5097	2.51	251	-54.5	261.1	95.9	102.4			155875	8555	35	13357.5	2	800	100
2	2.52	2.51941	2.52	252	-53.9	262.1	96.5	103.1			154723	8825	25	13621.5	2	800	100
2	2.53	2.52911	2.53	253	-53.3	262.5	97.2	103.7			155877	9005	35	13777.5	2	800	100
2	2.54	2.53882	2.54	254	-52.9	263.2	97.8	104.4			155878	8865	35	13949.5	2	800	100
2	2.55	2.54852	2.55	255	-52.4	263.8	98.5	105			154724	9165	25	14195.5	2	800	100
2	2.56	2.55822	2.56	256	-52	264.3	99.1	105.6			155876	9145	35	14393.5	2	800	100
2	2.57	2.56793	2.57	257	-51.7	264.8	99.8	106.2			155879	9180	35	14555.5	2	800	100
2	2.58	2.57763	2.58	258	-51.4	265.3	100.6	106.8			154725	9360	30	14759.5	2	800	100
2	2.59	2.58733	2.59	259	-50.9	266.1	101.3	107.5			155880	9610	35	14978.5	2	800	100
2	2.6	2.59704	2.6	260	-50.5	266.9	102	108.1			155881	9760	35	15201.5	2	800	100
2	2.61	2.60674	2.61	261	-49.8	267.3	102.7	108.7			154726	9680	30	15518.5	2	800	100
2	2.62	2.61645	2.62	262	-49.4	268.2	103.4	109.4			155882	10140	35	15735.5	2	800	100
2	2.63	2.62615	2.63	263	-49.2	268.7	104	110			155883	10435	35	15936.5	2	800	100
2	2.64	2.63585	2.64	264	-48.8	269.6	104.8	110.6			154727	10640	35	16117.5	2	800	100
2	2.65	2.64556	2.65	265	-48.3	270.4	105.5	111.2			155884	10675	35	16321.5	2	800	100
2	2.66	2.65526	2.66	266	-48	270.8	106.1	111.9			155885	10895	50	16508.5	2	800	100
2	2.67	2.66496	2.67	267	-47.6	271.5	106.8	112.5			155886	10765	35	16643.5	2	800	100
2	2.68	2.67467	2.68	268	-47.3	272.3	107.4	113.2			154728	11050	30	16754.5	2	800	100
2	2.69	2.68437	2.69	269	-46.9	272.8	108	113.8			155888	11435	50	16936.5	2	800	100
2	2.7	2.69408	2.7	270	-46.6	273.9	108.6	114.4
2	2.71	2.70378	2.71	271	-45.9	274.6	109.2	115
2	2.72	2.71348	2.72	272	-45.7	275.3	110	115.7
2	2.73	2.72319	2.73	273	-45	276	110.8	116.4
2	2.74	2.73289	2.74	274	-45.2	276.6	111.6	117
2	2.75	2.74259	2.75	275	-44.4	277.6	112.2	117.7
2	2.76	2.7523	2.76	276	-44	278.5	112.9	118.3
2	2.77	2.762	2.77	277	-43.6	279.1	113.5	118.9
2	2.78	2.77171	2.78	278	-42.8	280	114.3	119.5
2	2.79	2.78141	2.79	279	-42.7	280.6	114.9	120.1
2	2.8	2.79111	2.8	280	-42.4	281.5	115.6	120.8
2	2.81	2.80082	2.81	281	-42.2	282.3	116.1	121.4
2	2.82	2.81052	2.82	282	-41.8	283.1	116.7	122
2	2.83	2.82022	2.83	283	-41.5	284	117.3	122.6
2	2.84	2.82993	2.84	284	-41.4	284.6	118	123.3
2	2.85	2.83963	2.85	285	-41.1	285.6	118.7	123.9
2	2.86	2.84934	2.86	286	-41.1	286.5	119.2	124.6
2	2.87	2.85904	2.87	287	-40.8	287.3	119.7	125.2
2	2.88	2.86874	2.88	288	-40.5	288.2	120.4	125.8
2	2.89	2.87845	2.89	289	-39.9	288.9	121	126.4
2	2.9	2.88815	2.9	290	-39.6	289.9	121.6	127
2	2.91	2.89785	2.91	291	-39.4	290.4	122.3	127.6
2	2.92	2.90756	2.92	292	-39.1	291.4	123	128.3
2	2.93	2.91726	2.93	293	-38.6	292.2	123.6	128.9
2	2.94	2.92697	2.94	294	-38.3	293.2	124.3	129.5
2	2.95	2.93667	2.95	295	-38	293.8	124.8	130.2
2	2.96	2.94637	2.96	296	-37.5	295.2	125.4	130.8
2	2.97	2.95608	2.97	297	-37.4	296.5	126	131.4
2	2.98	2.96578	2.98	298	-37	297.1	126.8	132.1
2	2.99	2.97549	2.99	299	-36.8	298.5	127.5	132.7
2	3	2.98519	3	300	-36.5	299.2	128.1	133.3
2	3.01	2.99489	3.01	301	-36	299.6	128.6	133.9
2	3.02	3.0046	3.02	302	-35.6	300	129.1	134.5
2	3.03	3.0143	3.03	303	-34.9	300.3	129.6	135.1
2	3.04	3.024	3.04	304	-34.1	301	130.1	135.7
2	3.05	3.03371	3.05	305	-33.2	301.1	130.6	136.3
2	3.06	3.04341	3.06	306	-32.5	301.6	131.1	136.9
2	3.07	3.05312	3.07	307	-31.9	301.9	131.6	137.5
2	3.08	3.06282	3.08	308	-31.4	302.6	132.3	138.1
2	3.09	3.07252	3.09	309	-30.5	302.8	132.8	138.7
2	3.1	3.08223	3.1	310	-30	303.2	133.3	139.2
2	3.11	3.09193	3.11	311	-29.5	303.8	133.7	139.8
2	3.12	3.10163	3.12	312	-28.7	304	134.4	140.4
2	3.13	3.11134	3.13	313	-28.3	304.8	135.1	141
2	3.14	3.12104	3.14	314	-27.6	305	135.6	141.6
2	3.15	3.13075	3.15	315	-27.1	305.3	136.1	142.2
2	3.16	3.14045	3.16	316	-26.5	306	136.6	142.8
2	3.17	3.15015	3.17	317	-25.4	306.6	137	143.3
2	3.18	3.15986	3.18	318	-24.6	307	137.5	143.9
2	3.19	3.16956	3.19	319	-24.2	307.5	138.1	144.5
2	3.2	3.17926	3.2	320	-23.4	308.1	138.6	145.1
2	3.21	3.18897	3.21	321	-22.7	308.4	139.1	145.7
2	3.22	3.19867	3.22	322	-22.2	308.8	139.7	146.3
2	3.23	3.20838	3.23	323	-21.7	309.3	140.3	146.9
2	3.24	3.21808	3.24	324	-21	309.9	140.7	147.5
2	3.25	3.22778	3.25	325	-20.7	310.3	141.3	148.1
2	3.26	3.23749	3.26	326	-20.5	310.4	141.8	148.7
2	3.27	3.24719	3.27	327	-19.9	310.9	142.4	149.2
2	3.28	3.25689	3.28	328	-19.3	311.3	142.9	149.8
2	3.29	3.2666	3.29	329	-18.6	312.1	143.6	150.4
2	3.3	3.2763	3.3	330	-18	312.4	144.2	151
2	3.31	3.28601	3.31	331	-17.7	312.7	144.8	151.7
2	3.32	3.29571	3.32	332	-17	313.4	145.4	152.2
2	3.33	3.30541	3.33	333	-16.3	313.8	145.8	152.9
2	3.34	3.31512	3.34	334	-15.8	314.4	146.3	153.4
2	3.35	3.32482	3.35	335	-15.5	314.8	146.9	154
2	3.36	3.33453	3.36	336	-14.8	315.3	147.4	154.6
2	3.37	3.34423	3.37	337	-14.2	315.8	147.9	155.2
2	3.38	3.35393	3.38	338	-13.6	316.1	148.5	155.8
2	3.39	3.36364	3.39	339	-12.9	316.8	149.1	156.4
2	3.4	3.37334	3.4	340	-12.6	317.4	149.7	157
2	3.41	3.38304	3.41	341	-12.1	317.8	150.3	157.6
2	3.42	3.39275	3.42	342	-12	318.5	150.8	158.2
2	3.43	3.40245	3.43	343	-11.4	318.9	151.3	158.8
2	3.44	3.41216	3.44	344	-11	319.7	151.8	159.4
2	3.45	3.42186	3.45	345	-10.5	320.5	152.4	160
2	3.46	3.43156	3.46	346	-9.8	320.6	153	160.6
2	3.47	3.44127	3.47	347	-9.5	321.3	153.4	161.2
2	3.48	3.45097	3.48	348	-9.1	321.8	153.9	161.7
2	3.49	3.46067	3.49	349	-8.9	322.2	154.6	162.3
2	3.5	3.47038	3.5	350	-8.2	322.6	155.1	162.9
2	3.51	3.48008	3.51	351	-7.7	323.3	155.6	163.4
2	3.52	3.48979	3.52	352	-6.8	323.6	156.3	164
2	3.53	3.49949	3.53	353	-6.5	324.5	156.7	164.6
2	3.54	3.50919	3.54	354	-6.3	324.9	157.3	165.2
2	3.55	3.5189	3.55	355	-5.5	325.5	158	165.8
2	3.56	3.5286	3.56	356	-5.3	325.9	158.6	166.4
2	3.57	3.5383	3.57	357	-4.8	326.8	159	167
2	3.58	3.54801	3.58	358	-4.4	327	159.6	167.6
2	3.59	3.55771	3.59	359	-3.7	327.8	160.2	168.2
2	3.6	3.56742	3.6	360	-3.3	328.7	160.7	168.9
2	3.61	3.57712	3.61	361	-2.5	329.2	161.2	169.4
2	3.62	3.58682	3.62	362	-1.9	330	161.8	170
2	3.63	3.59653	3.63	363	-1.6	330.7	162.5	170.6
2	3.64	3.60623	3.64	364	-1.3	331.6	163	171.2
2	3.65	3.61593	3.65	365	-1	332.5	163.5	171.8
2	3.66	3.62564	3.66	366	-0.8	333.1	164.1	172.4
2	3.67	3.63534	3.67	367	-0.5	333.5	164.8	173
2	3.68	3.64505	3.68	368	0.1	334.2	165.3	173.5
2	3.69	3.65475	3.69	369	0.8	334.9	166	174.2
2	3.7	3.66445	3.7	370	0.8	335.6	166.6	174.8
2	3.71	3.67416	3.71	371	1.1	336	167.2	175.3
2	3.72	3.68386	3.72	372	1.6	337	167.7	175.9
2	3.73	3.69356	3.73	373	1.9	337.3	168.3	176.5
2	3.74	3.70327	3.74	374	2.3	337.7	169	177.1
2	3.75	3.71297	3.75	375	2.5	338.5	169.4	177.6
2	3.76	3.72268	3.76	376	3.1	339.7	170	178.2
2	3.77	3.73238	3.77	377	3.5	340	170.7	178.8
2	3.78	3.74208	3.78	378	3.7	340.6	171.1	179.3
2	3.79	3.75179	3.79	379	4.2	341.5	171.9	179.9
2	3.8	3.76149	3.8	380	4.8	342.2	172.3	180.5
2	3.81	3.7712	3.81	381	5.3	342.8	173	181.1
2	3.82	3.7809	3.82	382	5.7	343.6	173.5	181.7
2	3.83	3.7906	3.83	383	6.2	343.5	174.1	182.3
2	3.84	3.80031	3.84	384	6.7	344.6	174.6	182.8
2	3.85	3.81001	3.85	385	7	345.2	175	183.4
2	3.86	3.81971	3.86	386	7.4	346	175.5	184
2	3.87	3.82942	3.87	387	7.3	346.8	176.1	184.6
2	3.88	3.83912	3.88	388	7.6	347.9	176.7	185.1
2	3.89	3.84883	3.89	389	8.1	348.8	177.4	185.7
2	3.9	3.85853	3.9	390	8.5	349.4	178.2	186.3
2	3.91	3.86823	3.91	391	8.7	350.2	178.8	186.8
2	3.92	3.87794	3.92	392	9.4	350.6	179.3	187.4
2	3.93	3.88764	3.93	393	9.8	351.7	180	188
2	4	3.95557	3.94	394	10.2	352.4	180.5	188.6
2	4.01	3.96527	3.95	395	10.2	353.4	180.8	189.1
2	4.02	3.97497	3.96	396	10.6	354.5	181.2	189.7
2	4.03	3.98468	3.97	397	11.1	355.3	181.5	190.3
2	4.04	3.99438	3.98	398	11.5	355.9	182.2	190.8
2	4.05	4.00409	3.99	399	11.9	356.6	182.9	191.4
2	4.06	4.01379	4	400	12	357.7	183.5	192
2	4.07	4.02349	4.01	401	12.7	358	184.1	192.5
2	4.08	4.0332	4.02	402	13.7	358.3	184.7	193
2	4.09	4.0429	4.03	403	14.9	358.7	185.2	193.5
2	4.1	4.0526	4.04	404	15.9	358.9	185.7	194
2	4.11	4.06231	4.05	405	16.4	359.4	186.2	194.5
2	4.12	4.07201	4.06	406	17.1	359.7	186.6	194.9
2	4.13	4.08172	4.07	407	18.2	359.9	187.2	195.4
2	4.14	4.09142	4.08	408	18.5	360.4	187.7	195.9
2	4.15	4.10112	4.09	409	19.5	360.7	188.2	196.3
2	4.16	4.11083	4.1	410	20.1	361.1	188.5	196.8
2	4.17	4.12053	4.11	411	21.2	361.4	189	197.3
2	4.18	4.13023	4.12	412	21.6	361.9	189.5	197.8
2	4.19	4.13994	4.13	413	22.1	362	189.9	198.2
2	4.2	4.14964	4.14	414	22.5	362.7	190.5	198.7
2	4.21	4.15935	4.15	415	23.3	362.8	190.9	199.2
2	4.22	4.16905	4.16	416	23.4	363.1	191.4	199.6
2	4.23	4.17875	4.17	417	25.1	363.2	191.9	200.1
2	4.24	4.18846	4.18	418	25.5	363.4	192.3	200.6
2	4.25	4.19816	4.19	419	26.2	364.1	192.8	201.1
2	4.26	4.20787	4.2	420	27.2	364.3	193.6	201.6
2	4.27	4.21757	4.21	421	27.9	364.7	194	202.1
2	4.28	4.22727	4.22	422	28.6	364.9	194.5	202.6
2	4.29	4.23698	4.23	423	29.6	365.4	195	203.1
2	4.3	4.24668	4.24	424	30.1	365.9	195.5	203.5
2	4.31	4.25638	4.25	425	30.7	366.3	196	204
2	4.32	4.26609	4.26	426	31.1	366.5	196.5	204.5
2	4.33	4.27579	4.27	427	31.8	366.7	197.1	205
2	4.34	4.2855	4.28	428	32.4	367	197.7	205.5
2	4.35	4.2952	4.29	429	32.8	367.4	198.2	205.9
2	4.36	4.3049	4.3	430	33.5	367.9	198.6	206.4
2	4.37	4.31461	4.31	431	34.3	368.2	199.1	206.9
2	4.38	4.32431	4.32	432	35.1	368.6	199.7	207.4
2	4.39	4.33401	4.33	433	35.7	368.7	200.1	207.8
2	4.4	4.34372	4.34	434	36.3	368.9	200.7	208.3
2	4.41	4.35342	4.35	435	37.3	369.2	201.2	208.8
2	4.42	4.36313	4.36	436	37.9	369.9	201.8	209.3
2	4.43	4.37283	4.37	437	38.5	370.4	202.3	209.8
2	4.44	4.38253	4.38	438	39.1	370.7	202.6	210.3
2	4.45	4.39224	4.39	439	39.8	371.1	203.1	210.8
2	4.46	4.40194	4.4	440	40.8	371.3	203.6	211.2
2	4.47	4.41164	4.41	441	41.3	371.7	203.9	211.7
2	4.48	4.42135	4.42	442	42	372.1	204.5	212.2
2	4.49	4.43105	4.43	443	43.1	372.5	205	212.7
2	4.5	4.44076	4.44	444	43.5	372.9	205.5	213.2
2	4.51	4.45046	4.45	445	44	373.1	206.1	213.7
2	4.52	4.46016	4.46	446	44.2	373.7	206.6	214.1
2	4.53	4.46987	4.47	447	44.7	373.9	207.1	214.6
2	4.54	4.47957	4.48	448	45.5	374	207.6	215.2
2	4.55	4.48927	4.49	449	46	374.7	208.1	215.6
2	4.56	4.49898	4.5	450	46.5	375.3	208.5	216.1
2	4.57	4.50868	4.51	451	47.9	375.6	208.9	216.6
2	4.58	4.51839	4.52	452	48	376.1	209.4	217.1
2	4.59	4.52809	4.53	453	48.5	376.5	209.9	217.5
2	4.6	4.53779	4.54	454	48.9	376.9	210.2	218
2	4.61	4.5475	4.55	455	49.4	377.6	210.8	218.5
2	4.62	4.5572	4.56	456	50.4	377.7	211.3	219
2	4.63	4.56691	4.57	457	51.7	378.1	211.7	219.4
2	4.64	4.57661	4.58	458	51.8	378.7	212.1	220
2	4.65	4.58631	4.59	459	52.1	378.7	212.7	220.4
2	4.66	4.59602	4.6	460	52.6	379.5	213.2	220.9
2	4.67	4.60572	4.61	461	53.1	379.6	213.8	221.5
2	4.68	4.61542	4.62	462	54.1	380.3	214.2	222
2	4.69	4.62513	4.63	463	54.6	380.8	214.7	222.5
2	4.7	4.63483	4.64	464	55	381.3	215.3	223
2	4.71	4.64454	4.65	465	55.3	382	215.8	223.4
2	4.72	4.65424	4.66	466	55.7	382.5	216.3	223.9
2	4.73	4.66394	4.67	467	56.4	382.9	216.8	224.4
2	4.74	4.67365	4.68	468	57.6	383.2	217.2	224.9
2	4.75	4.68335	4.69	469	57.9	383.7	217.8	225.3
2	4.76	4.69305	4.7	470	59.1	383.9	218.4	225.8
2	4.77	4.70276	4.71	471	59.4	384.4	218.9	226.3
2	4.78	4.71246	4.72	472	59.4	384.7	219.4	226.8
2	4.79	4.72217	4.73	473	59.7	385.2	219.8	227.3
2	4.8	4.73187	4.74	474	60	385.8	220.4	227.8
2	4.81	4.74157	4.75	475	60.4	386.5	221	228.3
2	4.82	4.75128	4.76	476	61.1	387	221.6	228.8
2	4.83	4.76098	4.77	477	62	387.7	222.1	229.3
2	4.84	4.77068	4.78	478	62	388	222.6	229.7
2	4.85	4.78039	4.79	479	63	388.3	223.2	230.2
2	4.86	4.79009	4.8	480	63.3	388.7	223.7	230.7
2	4.87	4.7998	4.81	481	63.6	389.1	224.3	231.2
2	4.88	4.8095	4.82	482	64.2	389.4	224.8	231.7
2	4.89	4.8192	4.83	483	64.5	390.1	225.5	232.2
2	4.9	4.82891	4.84	484	64.8	390.5	226	232.7
2	4.91	4.83861	4.85	485	65.6	390.8	226.5	233.2
2	4.92	4.84831	4.86	486	65.9	391.5	227.1	233.7
2	4.93	4.85802	4.87	487	66.1	391.8	227.7	234.2
2	4.94	4.86772	4.88	488	66.4	392.5	228.3	234.6
2	4.95	4.87743	4.89	489	66.9	393	228.7	235.1
2	4.96	4.88713	4.9	490	67.1	393.4	229.2	235.5
2	4.97	4.89683	4.91	491	67.5	394	229.9	236.1
2	4.98	4.90654	4.92	492	68.3	394.5	230.4	236.6
2	4.99	4.91624	4.93	493	68.7	395	230.9	237.1
2	5	4.92594	4.94	494	68.9	395.5	231.5	237.5
2	5.01	4.93565	4.95	495	69.3	395.7	232	238
2	5.02	4.94535	4.96	496	70	396.1	232.6	238.5
2	5.03	4.95506	4.97	497	70.6	396.5	233.2	238.9
2	5.04	4.96476	4.98	498	70.8	397.1	233.7	239.4
2	5.05	4.97446	4.99	499	70.8	397.4	234.2	239.9
2	5.06	4.98417	5	500	71.2	398.2	234.7	240.4
2	5.07	4.99387	5.01	501	72.5	398.5	235.1	240.9
2	5.08	5.00358	5.02	502	73.1	398.7	235.5	241.4
2	5.09	5.01328	5.03	503	74.3	399.2	235.9	241.9
2	5.1	5.02298	5.04	504	75.4	399.6	236.6	242.4
2	5.11	5.03269	5.05	505	75.9	400	237.1	242.9
2	5.12	5.04239	5.06	506	76.4	400.1	237.7	243.4
2	5.13	5.05209	5.07	507	77.3	400.5	238.2	243.9
2	5.14	5.0618	5.08	508	78.3	400.8	238.6	244.4
2	5.15	5.0715	5.09	509	78.7	400.8	239	244.8
2	5.16	5.08121	5.1	510	79.2	401.1	239.4	245.3
2	5.17	5.09091	5.11	511	80.1	401.5	239.8	245.7
2	5.18	5.10061	5.12	512	80.8	401.7	240.4	246.2
2	5.19	5.11032	5.13	513	81.6	401.8	240.7	246.6
2	5.2	5.12002	5.14	514	82	402.1	241.1	247.1
2	5.21	5.12972	5.15	515	82.9	402.3	241.8	247.7
2	5.22	5.13943	5.16	516	83.2	402.8	242.3	248.1
2	5.23	5.14913	5.17	517	84.4	403.2	242.7	248.6
2	5.24	5.15884	5.18	518	85.7	403.4	243.2	249.1
2	5.25	5.16854	5.19	519	86	403.7	243.6	249.6
2	5.26	5.17824	5.2	520	87.1	404.1	244.2	250.1
2	5.27	5.18795	5.21	521	87.5	404.5	244.6	250.6
2	5.28	5.19765	5.22	522	88.7	405	245.1	251.1
2	5.29	5.20735	5.23	523	89.5	405.3	245.5	251.6
2	5.3	5.21706	5.24	524	89.9	405.6	245.9	252
2	5.31	5.22676	5.25	525	90.5	405.9	246.4	252.5
2	5.32	5.23647	5.26	526	91.6	406.2	246.9	253
2	5.33	5.24617	5.27	527	92	406.6	247.4	253.6
2	5.34	5.25587	5.28	528	92.9	406.9	247.8	254
2	5.35	5.26558	5.29	529	93.3	407.2	248.3	254.5
2	5.36	5.27528	5.3	530	93.9	407.4	248.9	255
2	5.37	5.28498	5.31	531	94.9	407.6	249.4	255.5
2	5.38	5.29469	5.32	532	95.8	408	250	256
2	5.39	5.30439	5.33	533	96.6	408.4	250.5	256.5
2	5.4	5.3141	5.34	534	97.4	408.3	251.1	257
2	5.41	5.3238	5.35	535	97.9	408.9	251.5	257.4
2	5.42	5.3335	5.36	536	98.7	409.3	252	257.9
2	5.43	5.34321	5.37	537	99.3	409.6	252.4	258.5
2	5.44	5.35291	5.38	538	99.7	409.8	252.9	258.9
2	5.45	5.36261	5.39	539	100.9	410.2	253.5	259.4
2	5.46	5.37232	5.4	540	101.6	410.6	253.9	259.9
2	5.47	5.38202	5.41	541	102.1	410.6	254.4	260.3
2	5.48	5.39173	5.42	542	103.1	411	255	260.8
2	5.49	5.40143	5.43	543	103.6	411.4	255.4	261.3
2	5.5	5.41113	5.44	544	103.9	412.2	256	261.9
2	5.51	5.42084	5.45	545	104.4	412.5	256.6	262.4
2	5.52	5.43054	5.46	546	105.3	412.5	257.1	262.9
2	5.53	5.44025	5.47	547	106.3	412.8	257.5	263.4
2	5.54	5.44995	5.48	548	106.9	413.6	258	263.9
2	5.55	5.45965	5.49	549	107.3	414	258.6	264.4
2	5.56	5.46936	5.5	550	107.8	414.4	259.1	264.8
2	5.57	5.47906	5.51	551	108.6	414.6	259.6	265.3
2	5.58	5.48876	5.52	552	108.8	414.9	260.2	265.8
2	5.59	5.49847	5.53	553	109.5	415.4	260.6	266.3
2	5.6	5.50817	5.54	554	109.7	415.9	261.1	266.8
2	5.61	5.51788	5.55	555	110.2	416.2	261.6	267.3
2	5.62	5.52758	5.56	556	110.8	416.4	262	267.8
2	5.63	5.53728	5.57	557	111	416.7	262.6	268.3
2	5.64	5.54699	5.58	558	111.8	417.1	263	268.8
2	5.65	5.55669	5.59	559	112	417.5	263.7	269.3
2	5.66	5.56639	5.6	560	112.7	417.8	264.1	269.8
2	5.67	5.5761	5.61	561	113.2	418.5	264.7	270.2
2	5.68	5.5858	5.62	562	113.4	418.8	265.1	270.7
2	5.69	5.59551	5.63	563	113.9	419.3	265.7	271.2
2	5.7	5.60521	5.64	564	114.5	419.9	266.1	271.6
2	5.71	5.61491	5.65	565	115.5	420	266.7	272.2
2	5.72	5.62462	5.66	566	116.7	420.8	267.1	272.7
2	5.73	5.63432	5.67	567	117.1	421.2	267.7	273.2
2	5.74	5.64402	5.68	568	117.6	421.8	268.3	273.7
2	5.75	5.65373	5.69	569	118.2	422.5	268.9	274.2
2	5.76	5.66343	5.7	570	118.4	422.8	269.3	274.7
2	5.77	5.67314	5.71	571	119.2	423.7	269.8	275.2
2	5.78	5.68284	5.72	572	119.8	423.9	270.4	275.6
2	5.79	5.69254	5.73	573	120.1	424.9	270.9	276.2
2	5.8	5.70225	5.74	574	120.5	425.2	271.4	276.6
2	5.81	5.71195	5.75	575	121.1	425.4	271.7	277.1
2	5.82	5.72165	5.76	576	121.7	425.9	272.1	277.6
2	5.83	5.73136	5.77	577	122.1	426.2	272.6	278.1
2	5.84	5.74106	5.78	578	122.8	426.5	273.3	278.6
2	5.85	5.75077	5.79	579	123.5	427.3	273.8	279
2	5.86	5.76047	5.8	580	123.8	427.9	274.3	279.5
2	5.87	5.77017	5.81	581	124.3	428.3	275	280
2	5.88	5.77988	5.82	582	124.8	428.9	275.5	280.5
2	5.89	5.78958	5.83	583	125.5	429.4	276	281
2	5.9	5.79928	5.84	584	125.7	430	276.5	281.5
2	5.91	5.80899	5.85	585	126.6	430.5	277	282
2	5.92	5.81869	5.86	586	126.8	431.1	277.5	282.5
2	5.93	5.8284	5.87	587	127.5	431.6	278.1	283
2	5.94	5.8381	5.88	588	127.7	432.3	278.7	283.5
2	5.95	5.8478	5.89	589	128.1	432.6	279.1	284
2	5.96	5.85751	5.9	590	128.4	432.8	279.6	284.5
2	5.97	5.86721	5.91	591	128.8	433.2	280.2	284.9
2	5.98	5.87692	5.92	592	129.3	433.7	280.6	285.4
2	5.99	5.88662	5.93	593	129.3	434.3	281.1	285.9
2	6	5.89632	5.94	594	129.8	435.2	281.5	286.4
2	6.01	5.90603	5.95	595	130.2	435.9	282.2	286.9
2	6.02	5.91573	5.96	596	130.2	436.4	282.7	287.3
2	6.03	5.92543	5.97	597	130.7	437.1	283.3	287.8
2	6.04	5.93514	5.98	598	131.1	437.7	283.8	288.3
2	6.05	5.94484	5.99	599	131.6	438.1	284.2	288.8
2	6.06	5.95455	6	600	131.9	438.5	284.9	289.3
2	6.07	5.96425	6.01	601	132.5	439.1	285.3	289.8
2	6.08	5.97395	6.02	602	133	439.2	285.8	290.3
2	6.09	5.98366	6.03	603	133.7	439.6	286.3	290.8
2	6.1	5.99336	6.04	604	134.6	439.7	286.8	291.3
2	6.11	6.00306	6.05	605	135.5	439.8	287.3	291.8
2	6.12	6.01277	6.06	606	136.2	440.3	287.8	292.4
2	6.13	6.02247	6.07	607	137	440.9	288.4	292.9
2	6.14	6.03218	6.08	608	137.6	441.3	289	293.4
2	6.15	6.04188	6.09	609	138.1	441.4	289.3	293.8
2	6.16	6.05158	6.1	610	138.4	441.9	289.9	294.3
2	6.17	6.06129	6.11	611	139.2	442.3	290.3	294.9
2	6.18	6.07099	6.12	612	139.9	442.6	290.8	295.4
2	6.19	6.08069	6.13	613	140.8	443.1	291.4	295.8
2	6.2	6.0904	6.14	614	141.2	443.7	291.9	296.3
2	6.21	6.1001	6.15	615	142	444.1	292.4	296.9
2	6.22	6.10981	6.16	616	142.6	444.4	292.9	297.4
2	6.23	6.11951	6.17	617	143.3	444.8	293.3	297.9
2	6.24	6.12921	6.18	618	143.7	445	293.8	298.4
2	6.25	6.13892	6.19	619	144.3	445.3	294.4	298.9
2	6.26	6.14862	6.2	620	144.6	445.6	294.9	299.4
2	6.27	6.15832	6.21	621	145.4	446	295.4	299.9
2	6.28	6.16803	6.22	622	145.9	446.3	295.8	300.4
2	6.29	6.17773	6.23	623	146.7	446.5	296.3	300.9
2	6.3	6.18744	6.24	624	147.4	447.1	296.8	301.4
2	6.31	6.19714	6.25	625	148	447.4	297.4	301.9
2	6.32	6.20684	6.26	626	148.5	448.1	297.8	302.4
2	6.33	6.21655	6.27	627	149	448.4	298.3	302.9
2	6.34	6.22625	6.28	628	149.3	448.6	298.9	303.5
2	6.35	6.23596	6.29	629	149.8	449	299.3	304
2	6.36	6.24566	6.3	630	150.5	449.2	299.8	304.5
2	6.37	6.25536	6.31	631	150.9	449.7	300.4	305
2	6.38	6.26507	6.32	632	151.3	450.1	300.9	305.5
2	6.39	6.27477	6.33	633	151.3	450.4	301.5	306
2	6.4	6.28447	6.34	634	152	450.9	302	306.5
2	6.41	6.29418	6.35	635	152.7	451.2	302.4	307
2	6.42	6.30388	6.36	636	153.2	451.6	303	307.5
2	6.43	6.31359	6.37	637	153.6	452	303.6	308
2	6.44	6.32329	6.38	638	154.2	452.1	303.8	308.5
2	6.45	6.33299	6.39	639	154.6	452.5	304.4	309
2	6.46	6.3427	6.4	640	155.4	453	305	309.5
2	6.47	6.3524	6.41	641	156	453.3	305.5	310
2	6.48	6.3621	6.42	642	156.6	453.9	306	310.5
2	6.54	6.42033	6.43	643	157	454.4	306.4	311
2	6.55	6.43003	6.44	644	157.7	454.6	306.9	311.5
2	6.56	6.43973	6.45	645	158.6	455.3	307.5	312.1
2	6.57	6.44944	6.46	646	158.8	455.5	308.1	312.6
2	6.58	6.45914	6.47	647	159.1	455.9	308.7	313.1
2	6.59	6.46885	6.48	648	159.3	456.2	309.2	313.6
2	6.6	6.47855	6.49	649	160	456.7	309.7	314
2	6.61	6.48825	6.5	650	161	457.1	310.2	314.5
2	6.62	6.49796	6.51	651	161.8	457.5	310.7	315.1
2	6.63	6.50766	6.52	652	162.3	458.1	311.1	315.6
2	6.64	6.51736	6.53	653	162.8	458.6	311.7	316.1
2	6.65	6.52707	6.54	654	163.5	459	312.2	316.6
2	6.66	6.53677	6.55	655	163.9	459.5	312.6	317.1
2	6.67	6.54648	6.56	656	164.4	460	313.2	317.6
2	6.68	6.55618	6.57	657	164.6	460.6	313.6	318.1
2	6.69	6.56588	6.58	658	164.3	461.1	314.1	318.6
2	6.7	6.57559	6.59	659	164.7	461.6	314.6	319
2	6.71	6.58529	6.6	660	165	462.1	315.2	319.6
2	6.72	6.59499	6.61	661	165	462.3	315.7	320
2	6.73	6.6047	6.62	662	165.7	463	316.1	320.5
2	6.74	6.6144	6.63	663	165.9	463.5	316.7	321
2	6.75	6.62411	6.64	664	166.4	463.9	317.2	321.6
2	6.76	6.63381	6.65	665	166.9	464	317.8	322
2	6.77	6.64351	6.66	666	167.1	464.7	318.6	322.6
2	6.78	6.65322	6.67	667	167.4	465.1	319.1	323.1
2	6.79	6.66292	6.68	668	167.8	465.9	319.8	323.6
2	6.8	6.67263	6.69	669	168.1	466.6	320.4	324.1
2	6.81	6.68233	6.7	670	168.5	467	320.8	324.6
2	6.82	6.69203	6.71	671	168.6	467.6	321.3	325.1
2	6.83	6.70174	6.72	672	169.1	468.1	321.8	325.6
2	6.84	6.71144	6.73	673	169.3	468.9	322.5	326.1
2	6.85	6.72114	6.74	674	169.7	469.7	323.2	326.6
2	6.86	6.73085	6.75	675	170.4	470.5	323.7	327.1
2	6.87	6.74055	6.76	676	170.9	471.7	323.9	327.6
2	6.88	6.75026	6.77	677	171.1	472.1	324.6	328.1
2	6.89	6.75996	6.78	678	171.6	472.5	325	328.6
2	6.9	6.76966	6.79	679	172	473.3	325.4	329.1
2	6.91	6.77937	6.8	680	172.3	474	325.8	329.6
2	6.92	6.78907	6.81	681	172.9	474.9	326.4	330.1
2	6.93	6.79877	6.82	682	173.4	475.3	327.2	330.6
2	6.94	6.80848	6.83	683	172.9	476.7	327.5	331.1
2	6.95	6.81818	6.84	684	173.5	476.9	328.1	331.5
2	6.96	6.82789	6.85	685	174	477	328.7	332
2	6.97	6.83759	6.86	686	173.9	477.9	329.2	332.5
2	6.98	6.84729	6.87	687	174.3	478.6	329.8	333
2	6.99	6.857	6.88	688	174.5	479.6	330.1	333.5
2	7	6.8667	6.89	689	174.5	480.5	330.7	334
2	7.01	6.8764	6.9	690	174.5	481.2	331.4	334.5
2	7.02	6.88611	6.91	691	174.4	481.7	331.7	335
2	7.03	6.89581	6.92	692	175	482.2	332.2	335.5
2	7.04	6.90552	6.93	693	175.6	482.6	332.7	336
2	7.05	6.91522	6.94	694	176	482.9	333.2	336.4
2	7.06	6.92492	6.95	695	176.1	484.4	333.8	336.9
2	7.07	6.93463	6.96	696	176.6	485.1	334.3	337.4
2	7.08	6.94433	6.97	697	176.5	486.2	334.7	337.9
2	7.09	6.95403	6.98	698	176.7	486.7	335.2	338.4
2	7.1	6.96374	6.99	699	177.1	487.6	335.6	338.9
2	7.11	6.97344	7	700	177.6	488.4	336.2	339.4
2	7.12	6.98315	7.01	701	178.5	488.8	336.6	339.9
2	7.13	6.99285	7.02	702	179.8	489.1	337.3	340.4
2	7.14	7.00255	7.03	703	180.3	489.5	337.8	340.9
2	7.15	7.01226	7.04	704	181.1	489.8	338.3	341.5
2	7.16	7.02196	7.05	705	182.1	490.2	338.6	341.9
2	7.17	7.03166	7.06	706	183	490.3	339.2	342.4
2	7.18	7.04137	7.07	707	183.6	490.6	339.7	342.9
2	7.19	7.05107	7.08	708	184.3	490.4	340.2	343.4
2	7.2	7.06078	7.09	709	184.9	490.8	340.8	343.9
2	7.21	7.07048	7.1	710	185.6	491.1	341.3	344.4
2	7.22	7.08018	7.11	711	186.2	491.4	341.8	344.9
2	7.23	7.08989	7.12	712	186.9	492.2	342.5	345.5
2	7.24	7.09959	7.13	713	187.6	492.6	342.9	346
2	7.25	7.1093	7.14	714	188.2	492.9	343.5	346.5
2	7.26	7.119	7.15	715	189.1	493.4	344.3	347
2	7.27	7.1287	7.16	716	190	493.9	344.6	347.5
2	7.28	7.13841	7.17	717	191	494.1	345.1	348
2	7.29	7.14811	7.18	718	191.3	494.4	345.7	348.5
2	7.3	7.15781	7.19	719	191.6	495	346.3	349
2	7.31	7.16752	7.2	720	192.6	495.5	346.8	349.5
2	7.32	7.17722	7.21	721	193.4	496.1	347.4	350
2	7.33	7.18693	7.22	722	194.1	496.4	348	350.6
2	7.34	7.19663	7.23	723	194.8	496.9	348.4	351
2	7.35	7.20633	7.24	724	195.4	497.2	348.9	351.6
2	7.36	7.21604	7.25	725	195.7	497.4	349.4	352.1
2	7.37	7.22574	7.26	726	196.2	497.7	349.8	352.6
2	7.38	7.23544	7.27	727	197.3	498.2	350.4	353.1
2	7.39	7.24515	7.28	728	198.4	498.7	350.9	353.6
2	7.4	7.25485	7.29	729	198.9	499.2	351.3	354.1
2	7.41	7.26456	7.3	730	199.4	499.6	351.8	354.6
2	7.42	7.27426	7.31	731	200.1	500	352.4	355.2
2	7.43	7.28396	7.32	732	200	500.6	352.9	355.7
2	7.44	7.29367	7.33	733	200.4	501.3	353.4	356.2
2	7.45	7.30337	7.34	734	200.8	501.5	353.9	356.7
2	7.46	7.31307	7.35	735	201.8	502.2	354.5	357.2
2	7.47	7.32278	7.36	736	202.2	502.5	354.9	357.7
2	7.48	7.33248	7.37	737	202.9	502.6	355.6	358.2
2	7.49	7.34219	7.38	738	203.7	503.3	356.2	358.7
2	7.5	7.35189	7.39	739	204.1	503.7	356.8	359.2
2	7.51	7.36159	7.4	740	205	504.1	357.4	359.8
2	7.52	7.3713	7.41	741	205.5	504.2	357.8	360.3
2	7.53	7.381	7.42	742	206.2	504.6	358.3	360.8
2	7.54	7.3907	7.43	743	206.4	504.9	358.8	361.3
2	7.55	7.40041	7.44	744	206.7	505.3	359.1	361.8
2	7.56	7.41011	7.45	745	207.1	505.7	359.6	362.4
2	7.57	7.41982	7.46	746	207.7	506.3	360.2	362.9
2	7.58	7.42952	7.47	747	208.1	506.7	360.7	363.3
2	7.59	7.43922	7.48	748	208.3	506.9	361.2	363.8
2	7.6	7.44893	7.49	749	209.1	507.5	361.7	364.3
2	7.61	7.45863	7.5	750	210	507.8	362.2	364.9
2	7.62	7.46834	7.51	751	210.6	508.5	362.8	365.4
2	7.63	7.47804	7.52	752	210.9	508.9	363.4	365.9
2	7.64	7.48774	7.53	753	211.7	509.7	364	366.4
2	7.65	7.49745	7.54	754	212.1	510.2	364.5	366.9
2	7.66	7.50715	7.55	755	212.3	510.5	365.2	367.4
2	7.67	7.51685	7.56	756	213	511	365.7	367.9
2	7.68	7.52656	7.57	757	213.5	511.5	366.2	368.4
2	7.69	7.53626	7.58	758	213.8	511.9	366.7	368.9
2	7.7	7.54597	7.59	759	214.4	512.6	367.2	369.4
2	7.71	7.55567	7.6	760	214.8	513	367.7	369.9
2	7.72	7.56537	7.61	761	215.4	513.3	368.4	370.5
2	7.73	7.57508	7.62	762	216.2	513.9	368.9	371
2	7.74	7.58478	7.63	763	216.8	514.6	369.3	371.5
2	7.75	7.59448	7.64	764	217.3	515	370	372
2	7.76	7.60419	7.65	765	218.2	515.9	370.5	372.5
2	7.77	7.61389	7.66	766	218.6	516.3	371.1	373.1
2	7.78	7.6236	7.67	767	219.2	517.2	371.5	373.6
2	7.79	7.6333	7.68	768	219.4	517.6	372	374.1
2	7.8	7.643	7.69	769	220.4	518.1	372.5	374.6
2	7.81	7.65271	7.7	770	221.1	518.6	373	375.2
2	7.82	7.66241	7.71	771	221.5	519.2	373.6	375.7
2	7.83	7.67211	7.72	772	222.1	519.4	374.1	376.2
2	7.84	7.68182	7.73	773	222.4	520	374.7	376.7
2	7.85	7.69152	7.74	774	222.9	520.7	375.2	377.2
2	7.86	7.70123	7.75	775	223.2	521.2	375.8	377.7
2	7.87	7.71093	7.76	776	223.7	521.7	376.3	378.2
2	7.88	7.72063	7.77	777	224.6	522.5	376.7	378.7
2	7.89	7.73034	7.78	778	224.8	523.1	377.4	379.2
2	7.9	7.74004	7.79	779	225.2	523.6	378	379.8
2	7.91	7.74974	7.8	780	225.5	524.1	378.7	380.4
2	7.92	7.75945	7.81	781	225.9	524.7	379.2	380.9
2	7.93	7.76915	7.82	782	226.3	525.4	379.8	381.4
2	7.94	7.77886	7.83	783	226.5	526.1	380.1	381.9
2	7.95	7.78856	7.84	784	226.9	526.5	380.7	382.4
2	7.96	7.79826	7.85	785	227.4	527	381.1	382.9
2	7.97	7.80797	7.86	786	227.9	527.6	381.6	383.4
2	7.98	7.81767	7.87	787	228.1	528.1	382.2	383.9
2	7.99	7.82737	7.88	788	228.9	528.9	382.7	384.4
2	8	7.83708	7.89	789	229.2	529.6	383.4	385
2	8.01	7.84678	7.9	790	229.4	530.8	384	385.5
2	8.02	7.85649	7.91	791	229.9	531.2	384.4	386
2	8.03	7.86619	7.92	792	230.8	532.6	385	386.5
2	8.04	7.87589	7.93	793	230.9	533.8	385.6	387.1
2	8.05	7.8856	7.94	794	231.2	534.2	386.1	387.6
2	8.06	7.8953	7.95	795	231.7	534.9	386.7	388.1
2	8.07	7.90501	7.96	796	231.9	535.8	387.2	388.6
2	8.08	7.91471	7.97	797	232.1	536.9	387.7	389.1
2	8.09	7.92441	7.98	798	232.7	537.9	388.1	389.7
2	8.1	7.93412	7.99	799	232.8	538.5	388.7	390.2
2	8.11	7.94382	8	800	233.3	539.2	389.2	390.7
2	8.12	7.95352	8.01	801	233.6	539.4	389.7	391.1
2	8.13	7.96323	8.02	802	234.1	539.4	390.3	391.6
2	8.14	7.97293	8.03	803	235	540.2	390.7	392.2
2	8.15	7.98264	8.04	804	235.6	540	391.3	392.7
2	8.16	7.99234	8.05	805	236.3	540.4	391.8	393.2
2	8.17	8.00204	8.06	806	236.9	541	392.2	393.7
2	8.18	8.01175	8.07	807	237.4	541.3	392.6	394.2
2	8.19	8.02145	8.08	808	238.2	541.7	393	394.7
2	8.2	8.03115	8.09	809	239.1	542	393.6	395.2
2	8.21	8.04086	8.1	810	239.3	542.4	394.2	395.8
2	8.22	8.05056	8.11	811	240.3	542.9	394.8	396.3
2	8.23	8.06027	8.12	812	241	543.1	395.4	396.8
2	8.24	8.06997	8.13	813	241.7	543.5	395.8	397.3
2	8.25	8.07967	8.14	814	242.6	544.1	396.2	397.8
2	8.26	8.08938	8.15	815	243.3	544.5	396.7	398.3
2	8.27	8.09908	8.16	816	243.8	545	397.1	398.8
2	8.28	8.10878	8.17	817	244.4	545.2	397.7	399.4
2	8.29	8.11849	8.18	818	244.7	545.4	398.2	399.8
2	8.3	8.12819	8.19	819	245.7	546	398.7	400.3
2	8.31	8.1379	8.2	820	246.1	546.2	399.2	400.9
2	8.32	8.1476	8.21	821	246.9	546.7	399.8	401.4
2	8.33	8.1573	8.22	822	247.5	547.1	400.3	401.9
2	8.34	8.16701	8.23	823	248.2	547.4	400.8	402.4
2	8.35	8.17671	8.24	824	248.5	547.9	401.4	402.9
2	8.36	8.18641	8.25	825	249.5	548.1	401.9	403.4
2	8.37	8.19612	8.26	826	250.3	548.7	402.4	404
2	8.38	8.20582	8.27	827	250.6	548.7	402.9	404.5
2	8.39	8.21553	8.28	828	251.6	549.1	403.3	405
2	8.4	8.22523	8.29	829	252.2	549.5	403.6	405.5
2	8.41	8.23493	8.3	830	253	549.9	404.3	406
2	8.42	8.24464	8.31	831	253.7	550.5	404.7	406.5
2	8.43	8.25434	8.32	832	254.1	550.7	405.4	407.1
2	8.44	8.26404	8.33	833	254.6	551.1	406	407.6
2	8.45	8.27375	8.34	834	255.7	551.4	406.5	408.1
2	8.46	8.28345	8.35	835	256.2	551.7	407.1	408.6
2	8.47	8.29316	8.36	836	256.7	552.3	407.5	409.1
2	8.48	8.30286	8.37	837	257.3	552.6	408	409.6
2	8.49	8.31256	8.38	838	257.7	553	408.4	410.1
2	8.5	8.32227	8.39	839	258.2	553.4	408.9	410.6
2	8.51	8.33197	8.4	840	258.9	553.7	409.3	411.1
2	8.52	8.34168	8.41	841	259.7	554.2	409.9	411.7
2	8.53	8.35138	8.42	842	260.2	554.5	410.4	412.2
2	8.54	8.36108	8.43	843	260.8	555	410.9	412.7
2	8.55	8.37079	8.44	844	261.5	555.4	411.5	413.2
2	8.56	8.38049	8.45	845	262.3	555.8	411.8	413.7
2	8.57	8.39019	8.46	846	262.8	556.1	412.5	414.2
2	8.58	8.3999	8.47	847	263.7	556.7	413.1	414.7
2	8.59	8.4096	8.48	848	264.4	556.9	413.5	415.3
2	8.6	8.41931	8.49	849	264.9	557.6	414.1	415.8
2	8.61	8.42901	8.5	850	265.4	558	414.6	416.3
2	8.62	8.43871	8.51	851	266	558.5	415.3	416.9
2	8.63	8.44842	8.52	852	266.5	559.1	415.9	417.4
2	8.64	8.45812	8.53	853	267.1	559.6	416.3	417.9
2	8.65	8.46782	8.54	854	267.7	560.1	416.8	418.4
2	8.66	8.47753	8.55	855	268	560.4	417.3	418.9
2	8.67	8.48723	8.56	856	268.5	560.7	417.8	419.4
2	8.68	8.49694	8.57	857	269	561.3	418.3	419.9
2	8.69	8.50664	8.58	858	269.3	561.8	418.8	420.4
2	8.7	8.51634	8.59	859	270.2	562.3	419.3	420.9
2	8.71	8.52605	8.6	860	270.7	563	419.7	421.4
2	8.72	8.53575	8.61	861	271.4	563.4	420.3	421.9
2	8.73	8.54545	8.62	862	271.8	564.1	420.7	422.5
2	8.74	8.55516	8.63	863	271.9	564.7	421.3	423
2	8.75	8.56486	8.64	864	272.5	564.9	421.7	423.4
2	8.76	8.57457	8.65	865	272.9	565.7	422.2	423.9
2	8.77	8.58427	8.66	866	273.4	566	422.8	424.4
2	8.78	8.59397	8.67	867	274.1	566.9	423.2	425
2	8.79	8.60368	8.68	868	274.3	567.2	423.7	425.5
2	8.8	8.61338	8.69	869	274.7	567.8	424.2	426
2	8.81	8.62308	8.7	870	275.1	567.8	424.7	426.5
2	8.82	8.63279	8.71	871	275.6	568.6	425.2	427
2	8.83	8.64249	8.72	872	275.5	569	425.8	427.5
2	8.84	8.6522	8.73	873	276.6	569.5	426.3	428
2	8.85	8.6619	8.74	874	276.2	570.3	426.7	428.5
2	8.86	8.6716	8.75	875	276.6	570.6	427.3	429
2	8.87	8.68131	8.76	876	277	571	427.8	429.6
2	8.88	8.69101	8.77	877	277.3	571.8	428.2	430.1
2	8.89	8.70072	8.78	878	277.7	572.1	428.7	430.6
2	8.9	8.71042	8.79	879	277.9	572.9	429.3	431.1
2	8.91	8.72012	8.8	880	278.5	573.3	429.7	431.6
2	8.92	8.72983	8.81	881	278.9	573.7	430.2	432.1
2	8.93	8.73953	8.82	882	279.3	574.1	430.7	432.6
2	8.94	8.74923	8.83	883	279.7	574.9	431.2	433.1
2	8.95	8.75894	8.84	884	280.2	575.5	431.8	433.6
2	8.96	8.76864	8.85	885	280.7	576	432.3	434.2
2	8.97	8.77835	8.86	886	280.9	577	432.9	434.7
2	8.98	8.78805	8.87	887	281.1	577.4	433.3	435.1
2	8.99	8.79775	8.88	888	281.6	578.1	433.8	435.6
2	9	8.80746	8.89	889	282	578.8	434.2	436.2
2	9.01	8.81716	8.9	890	282.6	579.5	434.7	436.7
2	9.02	8.82686	8.91	891	283.3	580.6	435.2	437.2
2	9.03	8.83657	8.92	892	283.8	581.2	435.8	437.7
2	9.04	8.84627	8.93	893	283.9	581.6	436.3	438.3
2	9.05	8.85598	8.94	894	284.3	582.2	436.9	438.8
2	9.06	8.86568	8.95	895	284.7	582.7	437.5	439.3
2	9.07	8.87538	8.96	896	284.7	583.3	438.1	439.8
2	9.08	8.88509	8.97	897	285.1	584	438.7	440.3
2	9.09	8.89479	8.98	898	285.6	584.4	439.2	440.8
2	9.1	8.90449	8.99	899	285.9	585.1	439.7	441.3
2	9.11	8.9142	9	900	286.5	585.9	440.1	441.8
2	9.12	8.9239	9.01	901	287.4	586	440.7	442.3
2	9.13	8.93361	9.02	902	287.6	586.6	441.2	442.9
2	9.14	8.94331	9.03	903	288.3	586.8	441.7	443.4
2	9.15	8.95301	9.04	904	289.3	587.2	442	443.9
2	9.16	8.96272	9.05	905	290.4	587.5	442.4	444.4
2	9.17	8.97242	9.06	906	291.3	587.9	442.9	444.9
2	9.18	8.98212	9.07	907	292.3	588.4	443.6	445.5
2	9.19	8.99183	9.08	908	293.1	588.8	444.1	446
2	9.2	9.00153	9.09	909	294	589	444.6	446.5
2	9.21	9.01124	9.1	910	294.8	589.3	445.1	447.1
2	9.22	9.02094	9.11	911	295.6	589.8	445.7	447.5
2	9.23	9.03064	9.12	912	296.1	590.2	446.2	448
2	9.24	9.04035	9.13	913	297.6	590.5	446.7	448.6
2	9.25	9.05005	9.14	914	298.4	591.1	447.1	449.1
2	9.26	9.05975	9.15	915	299.2	591.3	447.7	449.6
2	9.27	9.06946	9.16	916	300.4	591.4	448.2	450.2
2	9.28	9.07916	9.17	917	301.2	591.7	448.7	450.7
2	9.29	9.08887	9.18	918	302.3	592.2	449.4	451.2
2	9.3	9.09857	9.19	919	303.1	592.5	449.8	451.7
2	9.31	9.10827	9.2	920	303.7	592.8	450.3	452.2
2	9.32	9.11798	9.21	921	304.7	593.2	450.8	452.8
2	9.33	9.12768	9.22	922	305.6	593.1	451.3	453.2
2	9.34	9.13739	9.23	923	306.5	593.7	451.9	453.8
2	9.35	9.14709	9.24	924	307.1	593.8	452.5	454.2
2	9.36	9.15679	9.25	925	307.9	594.3	453	454.8
2	9.37	9.1665	9.26	926	308.6	594.3	453.5	455.3
2	9.38	9.1762	9.27	927	309.1	594.7	453.9	455.8
2	9.39	9.1859	9.28	928	309.3	595.2	454.3	456.2
2	9.4	9.19561	9.29	929	309.9	595.5	454.8	456.8
2	9.41	9.20531	9.3	930	311.2	595.9	455.3	457.3
2	9.42	9.21502	9.31	931	312	596.4	455.9	457.8
2	9.43	9.22472	9.32	932	312.4	596.8	456.4	458.4
2	9.44	9.23442	9.33	933	313.1	597.4	457	458.9
2	9.45	9.24413	9.34	934	313.8	597.7	457.4	459.5
2	9.46	9.25383	9.35	935	314.7	598.1	457.9	460
2	9.47	9.26353	9.36	936	315.4	598.6	458.5	460.5
2	9.48	9.27324	9.37	937	316.1	599	458.9	461
2	9.49	9.28294	9.38	938	316.3	599.4	459.4	461.6
2	9.5	9.29265	9.39	939	316.8	599.8	460	462.1
2	9.51	9.30235	9.4	940	317.6	600.1	460.6	462.6
2	9.52	9.31205	9.41	941	318.4	600.6	461	463.1
2	9.53	9.32176	9.42	942	318.8	600.8	461.5	463.6
2	9.54	9.33146	9.43	943	319.4	601.3	461.8	464.1
2	9.55	9.34116	9.44	944	320.3	601.8	462.4	464.6
2	9.56	9.35087	9.45	945	320.7	602.3	462.9	465.2
2	9.57	9.36057	9.46	946	321	602.7	463.6	465.7
2	9.58	9.37028	9.47	947	321.8	602.9	464.1	466.2
2	9.59	9.37998	9.48	948	322.3	603.2	464.7	466.7
2	9.6	9.38968	9.49	949	322.8	603.8	465.4	467.2
2	9.61	9.39939	9.5	950	323.4	604.2	465.9	467.7
2	9.62	9.40909	9.51	951	323.9	604.7	466.5	468.3
2	9.63	9.41879	9.52	952	324.7	605	466.9	468.8
2	9.64	9.4285	9.53	953	324.9	605.6	467.4	469.3
2	9.65	9.4382	9.54	954	325.5	606.1	467.9	469.8
2	9.66	9.44791	9.55	955	325.7	606.6	468.4	470.3
2	9.67	9.45761	9.56	956	326.5	607	468.9	470.9
2	9.68	9.46731	9.57	957	327.1	607.2	469.4	471.4
2	9.69	9.47702	9.58	958	327.4	607.7	469.9	471.9
2	9.7	9.48672	9.59	959	327.9	608	470.3	472.4
2	9.71	9.49642	9.6	960	328.3	608.6	470.8	473
2	9.72	9.50613	9.61	961	328.9	609	471.4	473.5
2	9.73	9.51583	9.62	962	329.5	609.5	471.8	474
2	9.74	9.52554	9.63	963	330.1	609.9	472.4	474.5
2	9.75	9.53524	9.64	964	330.5	610.1	472.8	475
2	9.76	9.54494	9.65	965	331	610.8	473.2	475.5
2	9.77	9.55465	9.66	966	331.8	611	473.8	476.1
2	9.78	9.56435	9.67	967	332.3	611.4	474.5	476.6
2	9.79	9.57406	9.68	968	332.7	612.1	475	477.2
2	9.8	9.58376	9.69	969	333.2	612.6	475.5	477.7
2	9.81	9.59346	9.7	970	333.3	613.1	476	478.2
2	9.82	9.60317	9.71	971	333.7	613.5	476.6	478.7
2	9.83	9.61287	9.72	972	334.3	614.3	477.2	479.3
2	9.84	9.62257	9.73	973	334.6	614.5	477.7	479.7
2	9.85	9.63228	9.74	974	335.1	615.1	478.2	480.3
2	9.86	9.64198	9.75	975	335.9	615.3	478.6	480.8
2	9.87	9.65169	9.76	976	336.4	615.8	479.1	481.3
2	9.88	9.66139	9.77	977	336.4	616.6	479.7	481.8
2	9.89	9.67109	9.78	978	336.8	617	480.2	482.3
2	9.9	9.6808	9.79	979	337.4	617.6	480.7	482.9
2	9.91	9.6905	9.8	980	337.7	618.1	481.2	483.4
2	9.92	9.7002	9.81	981	338.3	618.6	481.7	483.9
2	9.93	9.70991	9.82	982	338.6	619	482.2	484.4
2	9.94	9.71961	9.83	983	338.9	619.7	482.8	484.9
2	9.95	9.72932	9.84	984	339.5	620.2	483.3	485.4
2	9.96	9.73902	9.85	985	340.1	621	483.6	485.9
2	9.97	9.74872	9.86	986	340.9	621.5	484.2	486.5
2	9.98	9.75843	9.87	987	341.1	622.1	484.8	487
2	9.99	9.76813	9.88	988	341.8	622.7	485.3	487.5
2	10	9.77783	9.89	989	342.4	622.9	485.9	488
2	10.01	9.78754	9.9	990	342.6	623.7	486.3	488.5
2	10.02	9.79724	9.91	991	343.1	624.6	486.9	489.1
2	10.03	9.80695	9.92	992	343.7	625.4	487.5	489.6
2	10.04	9.81665	9.93	993	344.1	626.1	487.9	490
2	10.05	9.82635	9.94	994	344.9	626.8	488.5	490.6
2	10.06	9.83606	9.95	995	344.5	627.1	488.9	491.1
2	10.07	9.84576	9.96	996	344.8	627.1	489.5	491.6
2	10.08	9.85546	9.97	997	345.4	627.2	490.1	492
2	10.09	9.86517	9.98	998	345.7	628	490.7	492.6
2	10.1	9.87487	9.99	999	346.2	628.9	491.2	493.1
2	10.11	9.88458	10	1000	346.5	629.5	491.7	493.7
2	10.12	9.89428	10.01	1001	347.4	630.1	492.2	494.2
2	10.13	9.90398	10.02	1002	348.3	630.4	492.7	494.6
2	10.14	9.91369	10.03	1003	349	630.9	493.2	495.1
2	10.15	9.92339	10.04	1004	350	631.3	493.6	495.6
2	10.16	9.93309	10.05	1005	351.3	632.3	493.6	496.1
2	10.17	9.9428	10.06	1006	351.8	632.6	494.1	496.6
2	10.18	9.9525	10.07	1007	352.6	632.7	494.6	497.2
2	10.19	9.96221	10.08	1008	353.2	632.7	495.1	497.7
2	10.2	9.97191	10.09	1009	354.4	633.1	495.8	498.2
2	10.21	9.98161	10.1	1010	354.9	633.2	496.4	498.7
2	10.22	9.99132	10.11	1011	355.7	633.4	497.1	499.3
2	10.23	10.001	10.12	1012	356.2	633.8	497.6	499.8
2	10.24	10.0107	10.13	1013	357.2	634	498.1	500.4
2	10.25	10.0204	10.14	1014	357.9	634.7	498.5	500.9
2	10.29	10.0592	10.15	1015	358.8	635.1	498.9	501.4
2	10.3	10.0689	10.16	1016	359.2	635.4	499.4	501.9
2	10.31	10.0787	10.17	1017	359.3	635.8	499.7	502.4
2	10.32	10.0884	10.18	1018	360.3	636.1	500.2	502.9
2	10.33	10.0981	10.19	1019	360.8	636.5	500.6	503.4
2	10.34	10.1078	10.2	1020	361.7	636.8	501.1	503.9
2	10.35	10.1175	10.21	1021	362.3	637.2	501.6	504.4
2	10.36	10.1272	10.22	1022	363	637.7	502	504.9
2	10.37	10.1369	10.23	1023	363.9	637.6	502.6	505.4
2	10.38	10.1466	10.24	1024	364.6	638.2	503.1	505.9
2	10.39	10.1563	10.25	1025	365.5	638.3	503.6	506.5
2	10.4	10.166	10.26	1026	366	638.4	503.9	507
2	10.41	10.1757	10.27	1027	366.9	638.8	504.5	507.5
2	10.42	10.1854	10.28	1028	367.4	639.3	505.1	508
2	10.43	10.1951	10.29	1029	368.5	639.7	505.5	508.5
2	10.44	10.2048	10.3	1030	369	640.2	506	509.1
2	10.45	10.2145	10.31	1031	369.4	640.8	506.5	509.6
2	10.46	10.2242	10.32	1032	370	641	506.8	510.1
2	10.47	10.2339	10.33	1033	370.5	641.6	507.4	510.7
2	10.48	10.2436	10.34	1034	370.9	641.8	507.9	511.2
2	10.49	10.2533	10.35	1035	371.8	642.3	508.3	511.7
2	10.5	10.263	10.36	1036	372.6	642.7	508.8	512.2
2	10.51	10.2727	10.37	1037	373.2	643.3	509.2	512.7
2	10.52	10.2824	10.38	1038	374.2	643.5	509.7	513.2
2	10.53	10.2921	10.39	1039	374.9	643.5	510.3	513.7
2	10.56	10.3212	10.4	1040	375.7	644	510.7	514.3
2	10.57	10.3309	10.41	1041	376.1	644.1	511.2	514.8
2	10.58	10.3407	10.42	1042	376.9	644.5	511.8	515.3
2	10.59	10.3504	10.43	1043	377.7	644.8	512.2	515.8
2	10.6	10.3601	10.44	1044	378.4	645.3	512.6	516.4
2	10.61	10.3698	10.45	1045	379.3	645.8	513.1	516.9
2	10.62	10.3795	10.46	1046	380.2	646.1	513.6	517.4
2	10.63	10.3892	10.47	1047	380.6	646.3	514.1	517.9
2	10.64	10.3989	10.48	1048	381.3	646.8	514.6	518.4
2	10.65	10.4086	10.49	1049	381.8	647.2	515.1	518.9
2	10.66	10.4183	10.5	1050	382.2	647.7	515.7	519.5
2	10.67	10.428	10.51	1051	382.9	648.2	516.3	520
2	10.68	10.4377	10.52	1052	383.4	648.5	516.8	520.5
2	10.69	10.4474	10.53	1053	384.3	648.4	517.3	521.1
2	10.7	10.4571	10.54	1054	384.7	648.9	517.9	521.6
2	10.71	10.4668	10.55	1055	385.5	649.4	518.4	522.2
2	10.72	10.4765	10.56	1056	386.1	649.7	519.1	522.7
2	10.73	10.4862	10.57	1057	386.9	650.4	519.6	523.2
2	10.74	10.4959	10.58	1058	387.5	650.8	520.2	523.8
2	10.75	10.5056	10.59	1059	387.8	651.1	520.7	524.3
2	10.76	10.5153	10.6	1060	388.2	651.7	521.3	524.8
2	10.77	10.525	10.61	1061	389.5	652.1	521.7	525.3
2	10.78	10.5347	10.62	1062	390	652.2	522.3	525.8
2	10.79	10.5444	10.63	1063	390.8	652.6	522.8	526.3
2	10.8	10.5541	10.64	1064	391.3	652.9	523.4	526.9
2	10.81	10.5638	10.65	1065	391.8	653.4	523.8	527.4
2	10.82	10.5735	10.66	1066	392.3	654	524.4	527.9
2	10.83	10.5832	10.67	1067	393.2	654.5	525.1	528.5
2	10.84	10.593	10.68	1068	393.4	655	525.6	529
2	10.85	10.6027	10.69	1069	393.9	655.3	526.1	529.5
2	10.86	10.6124	10.7	1070	394.3	655.7	526.5	530
2	10.87	10.6221	10.71	1071	394.9	656.1	527	530.5
2	10.88	10.6318	10.72	1072	395.4	656.6	527.6	531
2	10.89	10.6415	10.73	1073	396.1	656.8	528	531.5
2	10.9	10.6512	10.74	1074	396.6	657.4	528.6	532
2	10.91	10.6609	10.75	1075	397	658.1	529.1	532.6
2	10.92	10.6706	10.76	1076	397.6	658.5	529.7	533.1
2	10.93	10.6803	10.77	1077	398.1	659	530.3	533.7
2	10.94	10.69	10.78	1078	398.7	659.6	530.9	534.2
2	10.95	10.6997	10.79	1079	399.2	660.3	531.4	534.7
2	10.96	10.7094	10.8	1080	399.3	660.5	531.8	535.2
2	10.97	10.7191	10.81	1081	399.5	661.3	532.3	535.7
2	10.98	10.7288	10.82	1082	400.1	662	532.9	536.3
2	10.99	10.7385	10.83	1083	400.4	662.4	533.4	536.8
2	11	10.7482	10.84	1084	400.6	662.9	533.9	537.3
2	11.01	10.7579	10.85	1085	401.2	663.2	534.5	537.9
2	11.02	10.7676	10.86	1086	401.7	663.5	535	538.4
2	11.03	10.7773	10.87	1087	401.9	664.1	535.5	538.9
2	11.04	10.787	10.88	1088	402.6	665	536.1	539.4
2	11.05	10.7967	10.89	1089	403.1	665.5	536.6	540
2	11.06	10.8064	10.9	1090	403.3	665.9	537.1	540.5
2	11.07	10.8161	10.91	1091	403.7	666.4	537.8	541
2	11.08	10.8258	10.92	1092	404.5	667.2	538.4	541.6
2	11.09	10.8355	10.93	1093	404.9	668	539	542.1
2	11.1	10.8453	10.94	1094	405.3	668.8	539.6	542.6
2	11.11	10.855	10.95	1095	405.8	669.5	540.1	543.2
2	11.12	10.8647	10.96	1096	406.1	670.3	540.7	543.6
2	11.13	10.8744	10.97	1097	406.6	670.9	541.2	544.2
2	11.14	10.8841	10.98	1098	407	671.5	541.8	544.7
2	11.15	10.8938	10.99	1099	407.4	672	542.2	545.2
2	11.16	10.9035	11	1100	408.2	672.9	542.8	545.7
2	11.17	10.9132	11.01	1101	409	673.4	543.4	546.4
2	11.18	10.9229	11.02	1102	410	674	544.1	547.2
2	11.19	10.9326	11.03	1103	411	674.7	544.8	547.9
2	11.2	10.9423	11.04	1104	412	675	545.5	548.6
2	11.21	10.952	11.05	1105	412.9	675.3	546.2	549.3
2	11.22	10.9617	11.06	1106	413.8	675.8	546.9	549.9
2	11.23	10.9714	11.07	1107	414.9	676.3	547.5	550.6
2	11.28	11.0199	11.08	1108	416.2	676.6	548.1	551.3
2	11.29	11.0296	11.09	1109	417.3	677.4	549	552
2	11.3	11.0393	11.1	1110	418	677.7	549.7	552.7
2	11.31	11.049	11.11	1111	419	678.1	550.4	553.4
2	11.32	11.0587	11.12	1112	420.1	678.5	551.1	554.1
2	11.33	11.0684	11.13	1113	421.4	679.1	551.9	554.9
2	11.34	11.0781	11.14	1114	422	679.5	552.6	555.5
2	11.35	11.0878	11.15	1115	423.3	680.2	553.3	556.3
2	11.36	11.0975	11.16	1116	424.5	680.7	554.1	557
2	11.37	11.1073	11.17	1117	425.4	681	554.8	557.7
2	11.38	11.117	11.18	1118	426.4	681.2	555.4	558.3
2	11.39	11.1267	11.19	1119	427.1	681.5	556.2	559
2	11.4	11.1364	11.2	1120	428.4	681.8	557	559.7
2	11.41	11.1461	11.21	1121	429.4	682.4	557.8	560.5
2	11.42	11.1558	11.22	1122	430.4	682.9	558.5	561.2
2	11.43	11.1655	11.23	1123	431.6	683.3	559.2	561.9
2	11.44	11.1752	11.24	1124	432.3	684	559.9	562.6
2	11.45	11.1849	11.25	1125	433.2	684.3	560.7	563.4
2	11.46	11.1946	11.26	1126	433.9	685	561.4	564.1
2	11.47	11.2043	11.27	1127	434.4	685.6	562.1	564.7
2	11.48	11.214	11.28	1128	435.3	686.2	562.9	565.5
2	11.49	11.2237	11.29	1129	436.1	686.7	563.7	566.2
2	11.5	11.2334	11.3	1130	437.4	687.7	564.4	567
2	11.51	11.2431	11.31	1131	437.9	688.2	565.3	567.6
2	11.52	11.2528	11.32	1132	438.8	688.8	566.1	568.3
2	11.53	11.2625	11.33	1133	439.7	688.9	566.9	569.1
2	11.54	11.2722	11.34	1134	440.6	689.5	567.7	569.8
2	11.55	11.2819	11.35	1135	441.3	690.2	568.5	570.4
2	11.56	11.2916	11.36	1136	442.1	690.7	569.2	571.2
2	11.57	11.3013	11.37	1137	443	691.5	570	571.8
2	11.58	11.311	11.38	1138	443.7	692.3	570.7	572.6
2	11.59	11.3207	11.39	1139	444.7	693	571.6	573.2
2	11.6	11.3304	11.4	1140	445.4	693.4	572.3	573.9
2	11.61	11.3401	11.41	1141	446.5	694.1	573.2	574.7
2	11.62	11.3498	11.42	1142	447.2	694.6	574	575.4
2	11.63	11.3596	11.43	1143	447.7	695.4	574.7	576.1
2	11.64	11.3693	11.44	1144	448.3	696	575.4	576.8
2	11.65	11.379	11.45	1145	448.6	696.6	576.2	577.5
2	11.66	11.3887	11.46	1146	449.4	697.1	576.9	578.2
2	11.67	11.3984	11.47	1147	450	697.7	577.8	579
2	11.68	11.4081	11.48	1148	450.8	698.4	578.6	579.6
2	11.69	11.4178	11.49	1149	451.7	699.2	579.5	580.4
2	11.7	11.4275	11.5	1150	452.2	699.8	580.1	581.1
2	11.71	11.4372	11.51	1151	452.9	700.4	580.9	581.8
2	11.72	11.4469	11.52	1152	453.4	701.1	581.6	582.5
2	11.73	11.4566	11.53	1153	454.1	701.8	582.4	583.2
2	11.74	11.4663	11.54	1154	454.6	702.6	583	583.9
2	11.75	11.476	11.55	1155	455.4	703	583.7	584.6
2	11.76	11.4857	11.56	1156	455.9	704	584.7	585.4
2	11.77	11.4954	11.57	1157	455.8	704.5	585.4	586.1
2	11.78	11.5051	11.58	1158	456.2	705.8	586.3	586.8
2	11.79	11.5148	11.59	1159	457.3	707.2	587	587.5
2	11.8	11.5245	11.6	1160	457.5	708	587.7	588.2
2	11.81	11.5342	11.61	1161	457.8	708.6	588.6	588.9
2	11.82	11.5439	11.62	1162	458.2	709.1	589.3	589.7
2	11.83	11.5536	11.63	1163	458.9	710.2	590.1	590.4
2	11.84	11.5633	11.64	1164	459.4	710.8	590.9	591.1
2	11.85	11.573	11.65	1165	460	711.6	591.7	591.8
2	11.86	11.5827	11.66	1166	460.5	712.4	592.4	592.5
2	11.87	11.5924	11.67	1167	461.2	713.3	593.1	593.2
2	11.88	11.6021	11.68	1168	461.8	714	593.9	593.9
2	11.89	11.6118	11.69	1169	462.3	714.9	594.6	594.6
2	11.9	11.6216	11.7	1170	462.9	715.6	595.5	595.3
2	11.91	11.6313	11.71	1171	463.6	716.2	596.3	596
2	11.92	11.641	11.72	1172	464.4	716.9	597	596.8
2	11.93	11.6507	11.73	1173	464.9	717.9	597.7	597.4
2	11.94	11.6604	11.74	1174	465.4	718.8	598.5	598.1
2	11.95	11.6701	11.75	1175	466	720.4	599.2	598.8
2	11.96	11.6798	11.76	1176	466.7	721	600	599.5
2	11.97	11.6895	11.77	1177	467.3	721.8	600.7	600.3
2	11.98	11.6992	11.78	1178	467.8	722.4	601.5	601
2	12.05	11.7671	11.79	1179	468.4	722.9	602.2	601.7
2	12.06	11.7768	11.8	1180	468.8	723.7	602.7	602.4
2	12.07	11.7865	11.81	1181	469	724.9	603.7	603.1
2	12.08	11.7962	11.82	1182	469.9	725.9	604.4	603.8
2	12.09	11.8059	11.83	1183	470.2	726.7	605.2	604.6
2	12.1	11.8156	11.84	1184	470.9	727.2	605.9	605.3
2	12.11	11.8253	11.85	1185	471.3	727.9	606.7	606
2	12.12	11.835	11.86	1186	471.9	728.7	607.4	606.7
2	12.13	11.8447	11.87	1187	472.1	729.5	608.2	607.5
2	12.14	11.8544	11.88	1188	472.8	730.3	609	608.2
2	12.15	11.8641	11.89	1189	473.4	731.3	609.6	608.9
2	12.16	11.8739	11.9	1190	473.7	732.2	610.3	609.6
2	12.17	11.8836	11.91	1191	474.2	733.4	611	610.3
2	12.18	11.8933	11.92	1192	474.8	734.4	611.7	610.9
2	12.19	11.903	11.93	1193	475.2	735.5	612.5	611.7
2	12.2	11.9127	11.94	1194	476.3	736.2	613.3	612.4
2	12.21	11.9224	11.95	1195	476.8	737.3	614.2	613.1
2	12.22	11.9321	11.96	1196	477.3	738.4	614.9	613.8
2	12.23	11.9418	11.97	1197	477.8	739.2	615.6	614.6
2	12.24	11.9515	11.98	1198	478.2	740.6	616.3	615.3
2	12.25	11.9612	11.99	1199	478.5	741.4	617	615.9
3	12	12	12	1200	478.8	742.3	618.1	616.6
3	12.0103	12.0096	12.01	1201	480.1	742.8	618.4	617.3
3	12.0207	12.0191	12.02	1202	481.8	743.2	619.1	618
3	12.031	12.0287	12.03	1203	483	743.6	619.7	618.7
3	12.0414	12.0382	12.04	1204	484.3	743.7	620.3	619.4
3	12.0517	12.0478	12.05	1205	485.7	744	621	620.1
3	12.0621	12.0574	12.06	1206	487.2	744.2	621.7	620.8
3	12.0724	12.0669	12.07	1207	487.8	744.6	622.3	621.5
3	12.0828	12.0765	12.08	1208	488.6	744.9	622.8	622.2
3	12.0931	12.0861	12.09	1209	490.1	745.4	623.4	622.9
3	12.1035	12.0956	12.1	1210	491.4	745.6	624.2	623.5
3	12.1138	12.1052	12.11	1211	492.6	746.5	624.7	624.2
3	12.1242	12.1147	12.12	1212	493.8	746.9	625.2	624.9
3	12.1345	12.1243	12.13	1213	495	747.4	625.8	625.5
3	12.1449	12.1339	12.14	1214	496.1	747.9	626.3	626.2
3	12.1552	12.1434	12.15	1215	497.4	748.2	627	627
3	12.1656	12.153	12.16	1216	498.2	749.2	627.6	627.6
3	12.1759	12.1626	12.17	1217	499.3	749.2	628.3	628.3
3	12.1863	12.1721	12.18	1218	500	749.8	629	629
3	12.1966	12.1817	12.19	1219	501.6	750	629.5	629.7
3	12.2069	12.1912	12.2	1220	502.7	749.9	630.2	630.4
3	12.2173	12.2008	12.21	1221	503.9	750.2	630.8	631.1
3	12.2276	12.2104	12.22	1222	505	750.6	631.4	631.7
3	12.238	12.2199	12.23	1223	505.8	750.7	632.1	632.4
3	12.2483	12.2295	12.24	1224	506.8	751.1	632.8	633.1
3	12.2587	12.2391	12.25	1225	507.8	751.7	633.4	633.8
3	12.269	12.2486	12.26	1226	508.8	752.3	634	634.4
3	12.2794	12.2582	12.27	1227	510.2	753	634.6	635.2
3	12.2897	12.2677	12.28	1228	510.8	753.2	635.2	635.9
3	12.3001	12.2773	12.29	1229	511.9	754.1	635.9	636.6
3	12.3104	12.2869	12.3	1230	512.6	754.3	636.5	637.2
3	12.3208	12.2964	12.31	1231	513.7	754.5	637.2	637.9
3	12.3311	12.306	12.32	1232	514.6	755.1	637.7	638.5
3	12.3415	12.3156	12.33	1233	515.7	755.7	638.3	639.3
3	12.3518	12.3251	12.34	1234	516.8	755.7	639.1	640
3	12.3622	12.3347	12.35	1235	517.4	756.2	639.7	640.7
3	12.3725	12.3442	12.36	1236	518.2	756.9	640.4	641.3
3	12.3829	12.3538	12.37	1237	519.3	757.4	641	642.1
3	12.3932	12.3634	12.38	1238	520.4	757.8	641.7	642.7
3	12.4035	12.3729	12.39	1239	521.4	758.3	642.3	643.4
3	12.4139	12.3825	12.4	1240	522.6	758.9	642.9	644.1
3	12.4242	12.3921	12.41	1241	523.3	759.7	643.5	644.8
3	12.4346	12.4016	12.42	1242	523.9	760.2	644.2	645.4
3	12.4449	12.4112	12.43	1243	524.7	761	645	646.1
3	12.4553	12.4207	12.44	1244	526.2	761.2	645.6	646.9
3	12.4656	12.4303	12.45	1245	527.2	761.5	646.2	647.5
3	12.476	12.4399	12.46	1246	527.8	761.9	647	648.2
3	12.4863	12.4494	12.47	1247	528.9	762.2	647.6	648.9
3	12.4967	12.459	12.48	1248	529.5	762.4	648.4	649.6
3	12.507	12.4686	12.49	1249	530.3	762.9	648.9	650.3
3	12.5174	12.4781	12.5	1250	531.2	763.7	649.6	651
3	12.5277	12.4877	12.51	1251	532.1	764.3	650.2	651.6
3	12.5381	12.4972	12.52	1252	532.8	765.2	650.8	652.3
3	12.5484	12.5068	12.53	1253	533.7	765.6	651.4	653
3	12.5588	12.5164	12.54	1254	534.9	766	652.2	653.7
3	12.5691	12.5259	12.55	1255	535.6	766.5	653	654.5
3	12.5795	12.5355	12.56	1256	536.4	767.3	653.7	655.2
3	12.5898	12.545	12.57	1257	536.9	768.1	654.3	655.9
3	12.6001	12.5546	12.58	1258	537.1	768.5	655	656.5
3	12.6105	12.5642	12.59	1259	537.8	769.6	655.6	657.3
3	12.6208	12.5737	12.6	1260	538.6	770.1	656.3	658
3	12.6312	12.5833	12.61	1261	539.2	770.5	656.9	658.7
3	12.6415	12.5929	12.62	1262	540	771.1	657.6	659.3
3	12.6519	12.6024	12.63	1263	540.6	771.9	658.3	660
3	12.6622	12.612	12.64	1264	541.5	772.5	659	660.7
3	12.6726	12.6215	12.65	1265	542.3	773.1	659.8	661.4
3	12.6829	12.6311	12.66	1266	542.7	773.1	660.4	662
3	12.6933	12.6407	12.67	1267	543.1	773.7	661.2	662.8
3	12.7036	12.6502	12.68	1268	543.7	774.5	661.9	663.5
3	12.714	12.6598	12.69	1269	544.4	775.2	662.8	664.2
3	12.7243	12.6694	12.7	1270	545	776.3	663.4	664.9
3	12.7347	12.6789	12.71	1271	545.6	777.1	664	665.6
3	12.745	12.6885	12.72	1272	545.9	777.7	664.7	666.3
3	12.7554	12.698	12.73	1273	546.4	778.6	665.4	667
3	12.7657	12.7076	12.74	1274	547.2	779.3	666.2	667.7
3	12.7761	12.7172	12.75	1275	547.9	780	666.9	668.4
3	12.7864	12.7267	12.76	1276	548.5	780.6	667.6	669.1
3	12.7967	12.7363	12.77	1277	549.1	781.3	668.2	669.8
3	12.8071	12.7459	12.78	1278	549.9	781.9	668.9	670.5
3	12.8174	12.7554	12.79	1279	550.4	783	669.5	671.2
3	12.8278	12.765	12.8	1280	550.7	783.4	670.2	671.9
3	12.8707	12.8046	12.81	1281	551.5	784.4	670.9	672.6
3	12.8885	12.8211	12.82	1282	552	785.1	671.5	673.2
3	12.8988	12.8306	12.83	1283	552.6	785.9	672.2	674
3	12.9092	12.8402	12.84	1284	553	786.5	672.9	674.7
3	12.9195	12.8498	12.85	1285	553.2	787.3	673.6	675.4
3	12.9299	12.8593	12.86	1286	553.6	788	674.2	676.1
3	12.9402	12.8689	12.87	1287	554.4	789.4	675	676.8
3	12.9506	12.8784	12.88	1288	554.7	790.5	675.7	677.5
3	12.9609	12.888	12.89	1289	555.9	791.6	676.4	678.2
3	12.9713	12.8976	12.9	1290	556.3	792.6	677.1	678.9
3	12.9816	12.9071	12.91	1291	557.5	793.2	677.8	679.6
3	12.992	12.9167	12.92	1292	557.9	794	678.5	680.3
3	13.0023	12.9263	12.93	1293	558.4	794.8	679.1	681
3	13.0127	12.9358	12.94	1294	559.2	795.9	679.9	681.7
3	13.023	12.9454	12.95	1295	559.8	796.8	680.5	682.4
3	13.0333	12.9549	12.96	1296	560.2	797.7	681.2	683.1
3	13.0437	12.9645	12.97	1297	561	798.8	682.1	683.8
3	13.054	12.9741	12.98	1298	561.2	799.6	682.8	684.5
3	13.0644	12.9836	12.99	1299	561.9	800.6	683.5	685.2
3	13.0747	12.9932	13	1300	562.4	801.7	684.1	685.9
3	13.0851	13.0028	13.01	1301	563.6	802	684.6	686.5
3	13.0954	13.0123	13.02	1302	564.1	802	685.2	687.1
3	13.1058	13.0219	13.03	1303	565	802.3	685.9	687.7
3	13.1161	13.0314	13.04	1304	565.5	802.6	686.4	688.4
3	13.1265	13.041	13.05	1305	566.5	803.2	687	689
3	13.1368	13.0506	13.06	1306	567.7	803.8	687.7	689.6
3	13.1472	13.0601	13.07	1307	568.4	804.1	688.4	690.2
3	13.1575	13.0697	13.08	1308	569.3	804.3	689	690.8
3	13.1679	13.0793	13.09	1309	569.9	804.8	689.5	691.5
3	13.1946	13.104	13.1	1310	570.4	805	690.1	692.1
3	13.2086	13.1169	13.11	1311	571.4	805.4	690.7	692.7
3	13.2189	13.1264	13.12	1312	572.2	806	691.3	693.4
3	13.2293	13.136	13.13	1313	573.2	806.4	691.9	694
3	13.2396	13.1455	13.14	1314	573.8	806.9	692.5	694.7
3	13.2499	13.1551	13.15	1315	574.6	807.3	693.2	695.3
3	13.2603	13.1647	13.16	1316	575.3	808.2	693.8	695.9
3	13.2706	13.1742	13.17	1317	575.9	808.4	694.4	696.5
3	13.281	13.1838	13.18	1318	576.4	809	695.1	697.2
3	13.2913	13.1934	13.19	1319	577.5	809.3	695.6	697.8
3	13.3017	13.2029	13.2	1320	578.3	809.7	696.3	698.5
3	13.312	13.2125	13.21	1321	579.1	810.3	696.9	699.1
3	13.3224	13.222	13.22	1322	579.9	811.1	697.5	699.7
3	13.3327	13.2316	13.23	1323	580.4	811.4	698.2	700.4
3	13.3431	13.2412	13.24	1324	581.4	811.9	699	701
3	13.3534	13.2507	13.25	1325	582.3	812.2	699.6	701.7
3	13.3638	13.2603	13.26	1326	583.2	812.7	700.3	702.3
3	13.3741	13.2699	13.27	1327	583.9	813.3	701.1	703
3	13.3845	13.2794	13.28	1328	584.6	814	701.7	703.5
3	13.3948	13.289	13.29	1329	585.7	814.6	702.4	704.2
3	13.4052	13.2985	13.3	1330	586.1	815.3	703.1	704.8
3	13.4155	13.3081	13.31	1331	587	815.5	703.7	705.4
3	13.4259	13.3177	13.32	1332	587.9	816.6	704.3	706
3	13.4362	13.3272	13.33	1333	588.9	817.2	705	706.7
3	13.4465	13.3368	13.34	1334	590.2	817.8	705.6	707.3
3	13.4569	13.3464	13.35	1335	590.5	818.8	706.3	708
3	13.4672	13.3559	13.36	1336	591.4	819.3	706.9	708.6
3	13.4928	13.3795	13.37	1337	592.2	819.4	707.6	709.2
3	13.5079	13.3935	13.38	1338	592.8	820	708.2	709.9
3	13.5183	13.4031	13.39	1339	593.7	820.4	708.7	710.5
3	13.5286	13.4126	13.4	1340	594.3	821	709.3	711.2
3	13.539	13.4222	13.41	1341	595.2	821.9	710	711.8
3	13.5493	13.4318	13.42	1342	596.1	822.9	710.7	712.5
3	13.5597	13.4413	13.43	1343	596.9	823.4	711.4	713.1
3	13.57	13.4509	13.44	1344	597.5	824	712	713.7
3	13.5804	13.4605	13.45	1345	598.4	824.5	712.7	714.4
3	13.5907	13.47	13.46	1346	599.2	825	713.4	715
3	13.6011	13.4796	13.47	1347	599.9	825.8	714.1	715.7
3	13.6114	13.4891	13.48	1348	600.6	826.5	714.7	716.3
3	13.6218	13.4987	13.49	1349	601.3	826.9	715.3	716.9
3	13.6321	13.5083	13.5	1350	601.7	828	715.9	717.5
3	13.6425	13.5178	13.51	1351	602.7	828.7	716.7	718.2
3	13.6528	13.5274	13.52	1352	603.2	829.3	717.3	718.8
3	13.6631	13.537	13.53	1353	603.8	830.1	717.9	719.4
3	13.6735	13.5465	13.54	1354	604.4	831.2	718.6	720
3	13.6838	13.5561	13.55	1355	604.8	831.7	719.2	720.6
3	13.6942	13.5656	13.56	1356	605.5	832.6	719.8	721.3
3	13.7045	13.5752	13.57	1357	606.1	832.8	720.5	721.9
3	13.7149	13.5848	13.58	1358	606.8	833.8	721	722.5
3	13.7252	13.5943	13.59	1359	607.3	834.6	721.6	723.2
3	13.7356	13.6039	13.6	1360	607.8	835.2	722.3	723.8
3	13.7459	13.6135	13.61	1361	608.8	836.2	722.9	724.4
3	13.7563	13.623	13.62	1362	609.8	837.3	723.4	725.1
3	13.7666	13.6326	13.63	1363	610.4	837.8	724.1	725.7
3	13.777	13.6421	13.64	1364	610.8	838.5	724.6	726.3
3	13.7873	13.6517	13.65	1365	611.5	839.3	725.1	726.9
3	13.7977	13.6613	13.66	1366	612.1	840.2	725.7	727.6
3	13.808	13.6708	13.67	1367	613.1	840.9	726.3	728.2
3	13.8184	13.6804	13.68	1368	613.5	841.8	726.8	728.8
3	13.8287	13.69	13.69	1369	614.3	842.4	727.5	729.4
3	13.8391	13.6995	13.7	1370	614.6	843.4	728.2	730.1
3	13.8494	13.7091	13.71	1371	615.1	844.6	728.8	730.7
3	13.8597	13.7186	13.72	1372	615.8	845.5	729.3	731.3
3	13.8701	13.7282	13.73	1373	616.3	846.2	729.9	732
3	13.8804	13.7378	13.74	1374	616.8	847	730.5	732.6
3	13.8908	13.7473	13.75	1375	617.5	847.7	731.2	733.2
3	13.9011	13.7569	13.76	1376	618	848.1	731.8	733.8
3	13.9115	13.7664	13.77	1377	618.4	848.9	732.4	734.5
3	13.9218	13.776	13.78	1378	619	849.4	733	735.1
3	13.9322	13.7856	13.79	1379	619.6	849.9	733.6	735.7
3	13.9425	13.7951	13.8	1380	619.9	850.8	734.2	736.3
3	13.9529	13.8047	13.81	1381	620.5	851.6	734.7	737
3	13.9632	13.8143	13.82	1382	620.9	852.8	735.3	737.6
3	13.9736	13.8238	13.83	1383	621.4	853.6	735.9	738.3
3	13.9839	13.8334	13.84	1384	621.8	854.6	736.5	738.9
3	13.9943	13.8429	13.85	1385	622.4	855.5	737.1	739.5
3	14.0046	13.8525	13.86	1386	622.7	855.9	737.7	740.1
3	14.015	13.8621	13.87	1387	623.1	856.7	738.3	740.7
3	14.0253	13.8716	13.88	1388	623.7	857.9	738.8	741.4
3	14.0357	13.8812	13.89	1389	624.3	858.5	739.6	742
3	14.046	13.8908	13.9	1390	624.8	859.4	740.2	742.6
3	14.0563	13.9003	13.91	1391	625.5	860.2	740.8	743.3
3	14.0667	13.9099	13.92	1392	626.1	861.1	741.5	743.9
3	14.077	13.9194	13.93	1393	626.5	862.3	742.1	744.5
3	14.0874	13.929	13.94	1394	627.1	863.3	742.7	745.2
3	14.0977	13.9386	13.95	1395	627.7	863.9	743.3	745.7
3	14.1081	13.9481	13.96	1396	628.2	864.7	743.9	746.4
3	14.1184	13.9577	13.97	1397	628.6	866	744.5	747
3	14.1288	13.9673	13.98	1398	629.3	866.9	745.1	747.6
3	14.1391	13.9768	13.99	1399	629.9	868	745.7	748.2
3	14.1495	13.9864	14	1400	630.3	869.2	746.4	748.9
3	14.1598	13.9959	14.01	1401	631.7	869.6	746.9	749.5
3	14.1702	14.0055	14.02	1402	632.3	870	747.5	750.1
3	14.1805	14.0151	14.03	1403	632.9	870.5	748	750.6
3	14.1909	14.0246	14.04	1404	633.5	870.8	748.4	751.2
3	14.2012	14.0342	14.05	1405	634.6	871	749	751.8
3	14.2116	14.0438	14.06	1406	636	871.5	749.7	752.4
3	14.2219	14.0533	14.07	1407	636.7	871.6	750.2	753
3	14.2323	14.0629	14.08	1408	637.5	872.1	750.8	753.6
3	14.2426	14.0724	14.09	1409	638.3	872.2	751.4	754.2
3	14.2529	14.082	14.1	1410	639.4	872.7	751.9	754.7
3	14.2633	14.0916	14.11	1411	640.4	873	752.6	755.3
3	14.2736	14.1011	14.12	1412	641.1	873.3	753.2	755.9
3	14.284	14.1107	14.13	1413	642.1	874.1	753.7	756.5
3	14.2943	14.1203	14.14	1414	643	874.4	754.4	757.1
3	14.3047	14.1298	14.15	1415	644.4	874.8	754.9	757.7
3	14.315	14.1394	14.16	1416	645.1	875.3	755.5	758.3
3	14.3254	14.1489	14.17	1417	645.6	875.9	756	758.9
3	14.3357	14.1585	14.18	1418	646.5	876.2	756.6	759.6
3	14.3461	14.1681	14.19	1419	647.5	876.5	757.1	760.2
3	14.3564	14.1776	14.2	1420	648.2	877.2	757.8	760.8
3	14.3668	14.1872	14.21	1421	649.2	877.7	758.4	761.3
3	14.3771	14.1968	14.22	1422	650.3	878.3	759	761.9
3	14.3875	14.2063	14.23	1423	651.3	878.6	759.4	762.5
3	14.3978	14.2159	14.24	1424	652	878.9	760	763.1
3	14.4082	14.2254	14.25	1425	653	879	760.5	763.7
3	14.4185	14.235	14.26	1426	654	879.8	761.2	764.3
3	14.4289	14.2446	14.27	1427	654.9	880.2	761.7	764.9
3	14.4392	14.2541	14.28	1428	655.6	880.9	762.2	765.5
3	14.4495	14.2637	14.29	1429	656.7	881.4	762.8	766.1
3	14.4599	14.2732	14.3	1430	657.1	881.8	763.5	766.7
3	14.4902	14.3013	14.31	1431	657.9	882.3	764.1	767.3
3	14.5006	14.3109	14.32	1432	658.8	883.3	764.7	767.9
3	14.5109	14.3204	14.33	1433	659.5	883.4	765.2	768.5
3	14.5213	14.33	14.34	1434	660.2	883.6	765.8	769.1
3	14.5316	14.3395	14.35	1435	660.8	884.3	766.3	769.6
3	14.542	14.3491	14.36	1436	661.2	884.9	766.9	770.2
3	14.5523	14.3587	14.37	1437	662.3	885.5	767.5	770.8
3	14.5627	14.3682	14.38	1438	662.6	886.1	768.2	771.4
3	14.573	14.3778	14.39	1439	662.9	887	768.8	772
3	14.5834	14.3874	14.4	1440	663.6	887.5	769.3	772.6
3	14.5937	14.3969	14.41	1441	663.9	887.9	769.9	773.2
3	14.6041	14.4065	14.42	1442	664.5	888.5	770.4	773.8
3	14.6144	14.416	14.43	1443	665.2	889.1	771.1	774.4
3	14.6248	14.4256	14.44	1444	665.8	889.6	771.7	775
3	14.6351	14.4352	14.45	1445	666.7	890.1	772.1	775.5
3	14.6455	14.4447	14.46	1446	667.3	890.7	772.7	776.1
3	14.6558	14.4543	14.47	1447	667.5	891	773.4	776.7
3	14.6661	14.4639	14.48	1448	668.3	891.6	774	777.3
3	14.6765	14.4734	14.49	1449	668.9	892.1	774.6	777.9
3	14.6868	14.483	14.5	1450	669.6	892.7	775.1	778.5
3	14.6972	14.4925	14.51	1451	670.4	893.3	775.7	779.1
3	14.7075	14.5021	14.52	1452	670.9	893.6	776.2	779.7
3	14.7179	14.5117	14.53	1453	671.8	894.3	776.8	780.2
3	14.7282	14.5212	14.54	1454	672.4	895	777.4	780.8
3	14.7815	14.5704	14.55	1455	673	895.6	777.9	781.4
3	14.7989	14.5866	14.56	1456	673.5	896.3	778.4	782
3	14.8093	14.5961	14.57	1457	674	897	778.9	782.6
3	14.8196	14.6057	14.58	1458	674.2	897.1	779.5	783.2
3	14.83	14.6152	14.59	1459	674.8	897.7	780.1	783.7
3	14.8403	14.6248	14.6	1460	675.5	898.5	780.6	784.3
3	14.8507	14.6344	14.61	1461	675.9	899.1	781.2	784.9
3	14.861	14.6439	14.62	1462	676.5	899.7	781.8	785.5
3	14.8714	14.6535	14.63	1463	677	900.6	782.4	786.1
3	14.8817	14.6631	14.64	1464	677.3	901.3	783	786.8
3	14.8921	14.6726	14.65	1465	678	902.1	783.6	787.4
3	14.9024	14.6822	14.66	1466	678.6	902.6	784.2	787.9
3	14.9127	14.6917	14.67	1467	679.1	903.4	784.7	788.5
3	14.9231	14.7013	14.68	1468	679.7	904.3	785.2	789.1
3	14.9334	14.7109	14.69	1469	680.1	904.7	785.8	789.6
3	14.9627	14.7379	14.7	1470	680.4	905.6	786.4	790.3
3	15.0041	14.7762	14.71	1471	680.9	906.4	787	790.8
3	15.0145	14.7858	14.72	1472	681.3	906.9	787.7	791.4
3	15.0248	14.7953	14.73	1473	681.9	907.7	788.2	792
3	15.0352	14.8049	14.74	1474	682.6	908.5	788.8	792.6
3	15.0455	14.8144	14.75	1475	682.8	909	789.4	793.2
3	15.0559	14.824	14.76	1476	683.2	909.9	790	793.8
3	15.0662	14.8336	14.77	1477	683.8	910.4	790.5	794.4
3	15.0766	14.8431	14.78	1478	683.9	911.4	791.1	795
3	15.0869	14.8527	14.79	1479	684.2	912.3	791.8	795.6
3	15.0973	14.8623	14.8	1480	684.7	913.3	792.3	796.1
3	15.1076	14.8718	14.81	1481	685.2	914.2	792.8	796.7
3	15.118	14.8814	14.82	1482	685.3	915.1	793.4	797.3
3	15.1283	14.8909	14.83	1483	685.7	915.8	794	797.9
3	15.1387	14.9005	14.84	1484	685.9	916.4	794.5	798.5
3	15.149	14.9101	14.85	1485	686.5	917.2	795	799.1
3	15.1593	14.9196	14.86	1486	686.7	917.8	795.6	799.7
3	15.1697	14.9292	14.87	1487	687.2	918.9	796.2	800.3
3	15.18	14.9388	14.88	1488	687.5	919.6	796.8	800.8
3	15.1904	14.9483	14.89	1489	688.2	920.4	797.5	801.4
3	15.2007	14.9579	14.9	1490	688.3	921	798.1	802
3	15.2111	14.9674	14.91	1491	688.7	922	798.6	802.6
3	15.2214	14.977	14.92	1492	689.1	922.8	799.1	803.1
3	15.2318	14.9866	14.93	1493	689.6	923.9	799.6	803.7
3	15.2421	14.9961	14.94	1494	690	924.8	800.3	804.3
3	15.2525	15.0057	14.95	1495	690.1	925.6	801	804.9
3	15.2628	15.0153	14.96	1496	690.6	926.6	801.6	805.5
3	15.2732	15.0248	14.97	1497	690.9	927.7	802.2	806.1
3	15.2835	15.0344	14.98	1498	691.3	928.6	802.8	806.6
3	15.2939	15.0439	14.99	1499	691.8	929.7	803.2	807.2
3	15.3042	15.0535	15	1500	692.3	930.6	803.8	807.9
3	15.3146	15.0631	15.01	1501	692.9	930.8	804.3	808.4
3	15.3249	15.0726	15.02	1502	693.8	931.1	804.8	808.9
3	15.3353	15.0822	15.03	1503	694.8	931.6	805.5	809.5
3	15.3456	15.0918	15.04	1504	695.6	932.4	805.9	810
3	15.3559	15.1013	15.05	1505	696.2	932.3	806.5	810.6
3	15.3663	15.1109	15.06	1506	697.2	932.9	807	811.1
3	15.3766	15.1204	15.07	1507	697.8	933.3	807.6	811.7
3	15.387	15.13	15.08	1508	698.9	933.3	808	812.2
3	15.3973	15.1396	15.09	1509	699.1	933.7	808.6	812.7
3	15.4077	15.1491	15.1	1510	700	934.1	809.1	813.2
3	15.418	15.1587	15.11	1511	700.8	934.5	809.6	813.8
3	15.4284	15.1682	15.12	1512	701.1	934.8	810.2	814.3
3	15.4387	15.1778	15.13	1513	701.7	935.1	810.7	814.8
3	15.4491	15.1874	15.14	1514	702.9	935.8	811.2	815.4
3	15.4594	15.1969	15.15	1515	703.6	936.2	811.7	816
3	15.4698	15.2065	15.16	1516	704.3	936.3	812.3	816.5
3	15.4801	15.2161	15.17	1517	705.1	936.9	812.7	817
3	15.4905	15.2256	15.18	1518	705.6	937.4	813.3	817.5
3	15.5008	15.2352	15.19	1519	706.1	937.7	813.8	818.1
3	15.5112	15.2447	15.2	1520	706.6	938.2	814.3	818.6
3	15.5215	15.2543	15.21	1521	707.1	938.7	814.8	819.1
3	15.5319	15.2639	15.22	1522	707.9	939	815.3	819.7
3	15.5422	15.2734	15.23	1523	708.6	939.3	815.8	820.2
3	15.5525	15.283	15.24	1524	709.4	939.7	816.3	820.7
3	15.5629	15.2926	15.25	1525	710	940.2	816.9	821.3
3	15.5732	15.3021	15.26	1526	710.7	941	817.5	821.9
3	15.5836	15.3117	15.27	1527	711.3	941.3	817.9	822.4
3	15.5939	15.3212	15.28	1528	712.1	941.8	818.4	823
3	15.6043	15.3308	15.29	1529	712.5	942.1	818.9	823.5
3	15.6146	15.3404	15.3	1530	713.1	942.7	819.4	824.1
3	15.625	15.3499	15.31	1531	713.3	943	820	824.6
3	15.6353	15.3595	15.32	1532	713.9	943.3	820.5	825.1
3	15.6457	15.3691	15.33	1533	714.3	944	821	825.7
3	15.656	15.3786	15.34	1534	714.8	944.1	821.5	826.2
3	15.6664	15.3882	15.35	1535	715.2	944.7	822	826.7
3	15.6767	15.3977	15.36	1536	715.2	945	822.6	827.2
3	15.6871	15.4073	15.37	1537	716.3	945.5	823.2	827.8
3	15.6974	15.4169	15.38	1538	716.5	945.5	823.7	828.3
3	15.7078	15.4264	15.39	1539	716.8	946	824.3	828.8
3	15.7181	15.436	15.4	1540	717.8	946.6	824.6	829.4
3	15.7285	15.4456	15.41	1541	717.9	947.2	825.1	829.9
3	15.7388	15.4551	15.42	1542	718.1	947.7	825.7	830.4
3	15.7491	15.4647	15.43	1543	718.8	948.1	826.2	830.9
3	15.7595	15.4742	15.44	1544	719.2	948.7	826.6	831.5
3	15.7698	15.4838	15.45	1545	719.6	949.2	827.2	832
3	15.7802	15.4934	15.46	1546	720.1	949.9	827.8	832.6
3	15.7905	15.5029	15.47	1547	720.7	950.3	828.3	833.1
3	15.8009	15.5125	15.48	1548	721.2	950.9	828.7	833.6
3	15.8112	15.5221	15.49	1549	721.7	951.4	829.3	834.2
3	15.8216	15.5316	15.5	1550	722.2	951.6	829.9	834.7
3	15.8319	15.5412	15.51	1551	722.9	952	830.4	835.3
3	15.8536	15.5612	15.52	1552	723	952.6	830.8	835.8
3	15.9026	15.6065	15.53	1553	723.6	953	831.3	836.4
3	15.913	15.6161	15.54	1554	724.1	953.5	831.8	836.9
3	15.9233	15.6256	15.55	1555	724.5	954	832.3	837.5
3	15.9337	15.6352	15.56	1556	724.9	954.8	833	837.9
3	15.944	15.6448	15.57	1557	725.5	955.2	833.4	838.5
3	15.9544	15.6543	15.58	1558	725.7	955.8	834	839
3	15.9647	15.6639	15.59	1559	726.3	956.5	834.5	839.6
3	15.9751	15.6734	15.6	1560	726.8	956.9	835	840.1
3	15.9854	15.683	15.61	1561	727.1	957.5	835.6	840.6
3	15.9957	15.6926	15.62	1562	727.5	958.4	836.2	841.2
3	16.0061	15.7021	15.63	1563	728.2	958.9	836.8	841.7
3	16.0164	15.7117	15.64	1564	728.3	959.7	837.4	842.2
3	16.0268	15.7213	15.65	1565	728.8	960.1	837.9	842.8
3	16.0371	15.7308	15.66	1566	729.3	960.5	838.4	843.3
3	16.0475	15.7404	15.67	1567	729.6	961.1	838.9	843.8
3	16.0578	15.7499	15.68	1568	729.9	961.5	839.3	844.4
3	16.0682	15.7595	15.69	1569	730.5	962.3	839.9	844.9
3	16.0785	15.7691	15.7	1570	730.7	963	840.4	845.4
3	16.0889	15.7786	15.71	1571	731.4	963.6	841	846
3	16.0992	15.7882	15.72	1572	731.7	964.4	841.5	846.5
3	16.1096	15.7978	15.73	1573	732.2	965.2	842	847.1
3	16.1199	15.8073	15.74	1574	732.8	965.7	842.5	847.6
3	16.1303	15.8169	15.75	1575	733.1	966.7	843	848.2
3	16.1406	15.8264	15.76	1576	733.2	967.4	843.5	848.7
3	16.151	15.836	15.77	1577	733.6	968.1	844.1	849.3
3	16.1613	15.8456	15.78	1578	734.1	968.6	844.7	849.8
3	16.1717	15.8551	15.79	1579	734.3	969.2	845.1	850.3
3	16.182	15.8647	15.8	1580	734.8	970	845.7	850.8
3	16.1923	15.8743	15.81	1581	735	970.7	846.2	851.3
3	16.2027	15.8838	15.82	1582	735.5	971.4	846.7	851.9
3	16.213	15.8934	15.83	1583	736	972.1	847.3	852.4
3	16.2234	15.9029	15.84	1584	736.4	972.9	847.8	853
3	16.2337	15.9125	15.85	1585	736.9	973.8	848.3	853.5
3	16.2441	15.9221	15.86	1586	737.3	974.6	848.9	854.1
3	16.2544	15.9316	15.87	1587	737.4	975.1	849.4	854.6
3	16.2648	15.9412	15.88	1588	737.8	976.5	850	855.1
3	16.2751	15.9507	15.89	1589	738.2	977.1	850.6	855.6
3	16.2855	15.9603	15.9	1590	738.3	978.1	851.1	856.2
3	16.2958	15.9699	15.91	1591	738.6	978.6	851.7	856.7
3	16.3062	15.9794	15.92	1592	738.9	979.5	852.3	857.3
3	16.3165	15.989	15.93	1593	739.3	980.5	852.9	857.8
3	16.3269	15.9986	15.94	1594	739.5	981.3	853.5	858.4
3	16.3372	16.0081	15.95	1595	739.8	982.1	854	858.9
3	16.3476	16.0177	15.96	1596	740.1	983.1	854.6	859.4
3	16.3579	16.0272	15.97	1597	740.5	983.8	855.2	860
3	16.3683	16.0368	15.98	1598	740.9	984.7	855.7	860.5
3	16.3786	16.0464	15.99	1599	741.2	985.5	856.1	861
3	16.3889	16.0559	16	1600	741.3	986.1	856.7	861.5
3	16.3993	16.0655	16.01	1601	742	986.6	857	862
3	16.4096	16.0751	16.02	1602	742.8	986.8	857.5	862.4
3	16.42	16.0846	16.03	1603	743.2	987	858	862.9
3	16.5003	16.1589	16.04	1604	744.1	987.4	858.4	863.3
3	16.5107	16.1684	16.05	1605	744.9	987.7	858.8	863.7
3	16.521	16.178	16.06	1606	745.5	988	859.3	864.2
3	16.5314	16.1876	16.07	1607	746.1	988.1	859.8	864.6
3	16.5417	16.1971	16.08	1608	746.9	988.3	860.3	865
3	16.5521	16.2067	16.09	1609	747.5	988.7	860.7	865.5
3	16.5624	16.2162	16.1	1610	748.2	989.2	861	865.9
3	16.5728	16.2258	16.11	1611	749	989.5	861.4	866.3
3	16.5831	16.2354	16.12	1612	749.7	989.8	861.9	866.8
3	16.5935	16.2449	16.13	1613	750.3	989.2	862.2	867.2
3	16.6038	16.2545	16.14	1614	751.1	989.7	862.7	867.6
3	16.6142	16.2641	16.15	1615	751.7	990	863.1	868.1
3	16.6245	16.2736	16.16	1616	752.3	990.3	863.7	868.5
3	16.6349	16.2832	16.17	1617	753	990.7	864.1	869
3	16.6452	16.2927	16.18	1618	753.5	991	864.6	869.4
3	16.6555	16.3023	16.19	1619	754.2	991.2	865.1	869.8
3	16.6659	16.3119	16.2	1620	754.9	991.6	865.5	870.3
3	16.6762	16.3214	16.21	1621	754.8	991.8	866	870.7
3	16.6866	16.331	16.22	1622	755.4	992	866.3	871.1
3	16.6969	16.3406	16.23	1623	755.7	992.5	866.8	871.5
3	16.7073	16.3501	16.24	1624	756.1	992.8	867.2	872
3	16.7176	16.3597	16.25	1625	756.5	993	867.6	872.4
3	16.728	16.3692	16.26	1626	756.9	993.2	868.1	872.8
3	16.7383	16.3788	16.27	1627	757.5	993.7	868.4	873.2
3	16.7487	16.3884	16.28	1628	757.9	994.1	868.9	873.7
3	16.759	16.3979	16.29	1629	758.3	994.2	869.2	874.1
3	16.7694	16.4075	16.3	1630	758.6	994.8	869.9	874.6
3	16.7797	16.4171	16.31	1631	759.3	995.1	870.3	875
3	16.7901	16.4266	16.32	1632	759.6	995.6	870.8	875.5
3	16.8004	16.4362	16.33	1633	760.2	996	871.2	875.9
3	16.8108	16.4457	16.34	1634	760.9	996.3	871.6	876.4
3	16.8211	16.4553	16.35	1635	761.2	996.4	872	876.8
3	16.8315	16.4649	16.36	1636	761.9	996.9	872.5	877.2
3	16.8418	16.4744	16.37	1637	762.5	997.2	873	877.7
3	16.8521	16.484	16.38	1638	763	997.4	873.4	878.1
3	16.8625	16.4936	16.39	1639	763.4	997.8	873.9	878.5
3	16.8728	16.5031	16.4	1640	764	998	874.4	878.9
3	16.8832	16.5127	16.41	1641	764	998.3	874.8	879.3
3	16.8935	16.5222	16.42	1642	764.4	998.8	875.3	879.8
3	16.9039	16.5318	16.43	1643	765.2	999.1	875.9	880.2
3	16.9142	16.5414	16.44	1644	765.1	999.2	876.3	880.6
3	16.9246	16.5509	16.45	1645	765.7	999.6	876.8	881.1
3	16.9349	16.5605	16.46	1646	766.1	999.8	877.3	881.5
3	16.9453	16.57	16.47	1647	766.6	1000.1	877.7	882
3	16.9556	16.5796	16.48	1648	766.8	1000.6	878.3	882.4
3	16.966	16.5892	16.49	1649	767.2	1001	878.7	882.9
3	16.9763	16.5987	16.5	1650	767.7	1001.2	879.2	883.3
3	16.9867	16.6083	16.51	1651	768.1	1001.4	879.6	883.7
3	16.997	16.6179	16.52	1652	768.3	1002.2	880.1	884.1
3	17.0074	16.6274	16.53	1653	769	1002.3	880.6	884.6
3	17.0177	16.637	16.54	1654	769.3	1002.7	881.1	885
3	17.0281	16.6465	16.55	1655	769.8	1003.5	881.4	885.4
3	17.0384	16.6561	16.56	1656	770.3	1003.2	882	885.9
3	17.0487	16.6657	16.57	1657	770.7	1003.7	882.4	886.3
3	17.0591	16.6752	16.58	1658	771.3	1004.1	882.9	886.8
3	17.0694	16.6848	16.59	1659	771.6	1004.6	883.4	887.2
3	17.0798	16.6944	16.6	1660	771.9	1004.9	884	887.6
3	17.0901	16.7039	16.61	1661	772.5	1005.3	884.5	888.1
3	17.1005	16.7135	16.62	1662	773.1	1005.9	885	888.5
3	17.1108	16.723	16.63	1663	773.5	1006.1	885.4	888.9
3	17.1212	16.7326	16.64	1664	773.9	1006.7	885.9	889.4
3	17.1315	16.7422	16.65	1665	774.3	1007.2	886.5	889.8
3	17.1419	16.7517	16.66	1666	774.7	1007.5	887	890.3
3	17.1522	16.7613	16.67	1667	775	1008.2	887.5	890.7
3	17.1626	16.7709	16.68	1668	775.3	1008.5	888	891.1
3	17.1729	16.7804	16.69	1669	775.8	1009.2	888.5	891.6
3	17.1833	16.79	16.7	1670	776	1009.6	888.9	892
3	17.1936	16.7995	16.71	1671	776.5	1010	889.3	892.4
3	17.204	16.8091	16.72	1672	776.7	1010.4	889.8	892.9
3	17.2143	16.8187	16.73	1673	777	1011	890.1	893.3
3	17.2247	16.8282	16.74	1674	777.6	1011.2	890.6	893.7
3	17.235	16.8378	16.75	1675	778.1	1011.3	891.1	894.2
3	17.2453	16.8474	16.76	1676	778.3	1011.9	891.6	894.6
3	17.2557	16.8569	16.77	1677	779	1012.3	892.1	895
3	17.266	16.8665	16.78	1678	779.2	1012.8	892.5	895.5
3	17.2764	16.876	16.79	1679	779.7	1013.7	893.1	895.9
3	17.2867	16.8856	16.8	1680	779.9	1014.2	893.5	896.4
3	17.2971	16.8952	16.81	1681	780.2	1015	894.1	896.8
3	17.3074	16.9047	16.82	1682	780.5	1015.5	894.6	897.2
3	17.3178	16.9143	16.83	1683	780.9	1016	895	897.7
3	17.3281	16.9239	16.84	1684	781.1	1016.3	895.5	898.1
3	17.3385	16.9334	16.85	1685	781.5	1017.1	896.1	898.5
3	17.3488	16.943	16.86	1686	781.7	1017.3	896.5	899
3	17.3592	16.9525	16.87	1687	781.9	1017.7	897	899.4
3	17.3695	16.9621	16.88	1688	782.1	1018.2	897.4	899.9
3	17.3799	16.9717	16.89	1689	782.3	1018.7	897.9	900.3
3	17.3902	16.9812	16.9	1690	782.5	1019.3	898.4	900.7
3	17.4006	16.9908	16.91	1691	783	1019.5	898.8	901.2
3	17.4109	17.0004	16.92	1692	783.6	1019.8	899.3	901.6
3	17.4213	17.0099	16.93	1693	783.6	1020.5	899.8	902
3	17.4316	17.0195	16.94	1694	784	1021	900.3	902.5
3	17.4419	17.029	16.95	1695	784.4	1021.3	900.7	903
3	17.4523	17.0386	16.96	1696	784.9	1022.1	901.2	903.4
3	17.4626	17.0482	16.97	1697	785.1	1022.7	901.6	903.8
3	17.473	17.0577	16.98	1698	785.7	1023.2	902	904.3
3	17.4833	17.0673	16.99	1699	786	1023.8	902.4	904.7
3	17.4937	17.0768	17	1700	786.3	1024.4	902.9	905.1
3	17.504	17.0864	17.01	1701	787	1024.6	903.4	905.5
3	17.5144	17.096	17.02	1702	787.8	1025	903.9	906
3	17.5247	17.1055	17.03	1703	788.6	1025.2	904.4	906.5
3	17.5351	17.1151	17.04	1704	789.5	1025.3	904.7	906.9
3	17.5454	17.1247	17.05	1705	790.4	1025.6	905.2	907.3
3	17.5558	17.1342	17.06	1706	790.8	1025.9	905.6	907.7
3	17.5661	17.1438	17.07	1707	791.8	1026.2	906	908.2
3	17.5765	17.1533	17.08	1708	792.3	1026.7	906.4	908.6
3	17.5868	17.1629	17.09	1709	792.8	1026.9	906.7	909
3	17.5972	17.1725	17.1	1710	793.5	1027.2	907.1	909.4
3	17.6075	17.182	17.11	1711	794.3	1027.4	907.5	909.8
3	17.6179	17.1916	17.12	1712	794.6	1027.3	907.8	910.2
3	17.6282	17.2012	17.13	1713	795.2	1027.5	908.3	910.7
3	17.6385	17.2107	17.14	1714	795.8	1027.9	908.7	911.1
3	17.6489	17.2203	17.15	1715	796.4	1028.4	909.2	911.6
3	17.6592	17.2298	17.16	1716	796.9	1028.6	909.5	912
3	17.6696	17.2394	17.17	1717	797.5	1029	910	912.5
3	17.6799	17.249	17.18	1718	797.9	1029.3	910.3	912.9
3	17.6903	17.2585	17.19	1719	798.4	1029.5	910.7	913.3
3	17.7006	17.2681	17.2	1720	798.8	1029.7	911.2	913.8
3	17.711	17.2777	17.21	1721	799.5	1030	911.6	914.2
3	17.7213	17.2872	17.22	1722	800	1030.3	912.1	914.7
3	17.7317	17.2968	17.23	1723	800.7	1030.7	912.5	915.1
3	17.742	17.3063	17.24	1724	801.1	1031	912.8	915.5
3	17.7524	17.3159	17.25	1725	801.6	1031.4	913.2	916
3	17.7627	17.3255	17.26	1726	801.7	1031.9	913.6	916.4
3	17.7731	17.335	17.27	1727	802.6	1031.6	914	916.8
3	17.7834	17.3446	17.28	1728	803.1	1032.1	914.5	917.3
3	17.7938	17.3542	17.29	1729	803.8	1032.5	914.9	917.7
3	17.8041	17.3637	17.3	1730	804.1	1032.4	915.3	918.2
3	17.8145	17.3733	17.31	1731	804.2	1032.9	915.8	918.6
3	17.8248	17.3828	17.32	1732	804.6	1033.2	916.2	919
3	17.8351	17.3924	17.33	1733	805.2	1033.7	916.7	919.5
3	17.8455	17.402	17.34	1734	806.1	1034	917	920
3	17.8558	17.4115	17.35	1735	806.6	1034.2	917.5	920.3
3	17.8662	17.4211	17.36	1736	807.1	1034.7	917.8	920.8
3	17.8765	17.4307	17.37	1737	807.6	1034.9	918.2	921.2
3	17.8869	17.4402	17.38	1738	807.9	1035.1	918.9	921.7
3	17.8972	17.4498	17.39	1739	808.5	1035.6	919.2	922.1
3	17.9076	17.4593	17.4	1740	808.9	1035.9	919.6	922.6
3	17.9179	17.4689	17.41	1741	809.5	1036.3	920.1	923
3	17.9283	17.4785	17.42	1742	809.7	1036.9	920.5	923.4
3	17.9386	17.488	17.43	1743	810.4	1037.2	921	923.9
3	17.949	17.4976	17.44	1744	811.1	1037.4	921.4	924.3
3	17.9593	17.5071	17.45	1745	811.5	1038	921.8	924.8
3	17.9987	17.5435	17.46	1746	811.8	1038.1	922.2	925.3
3	18.01	17.554	17.47	1747	812.2	1038.3	922.7	925.7
3	18.0204	17.5636	17.48	1748	812.6	1038.7	923.2	926.1
3	18.0307	17.5731	17.49	1749	813.2	1038.8	923.5	926.6
3	18.0411	17.5827	17.5	1750	813.6	1038.9	924	927
3	18.0514	17.5922	17.51	1751	813.8	1039.5	924.4	927.4
3	18.0617	17.6018	17.52	1752	814.1	1040	924.8	927.9
3	18.0721	17.6114	17.53	1753	814.7	1040.3	925.3	928.3
3	18.0824	17.6209	17.54	1754	815.2	1040.6	925.9	928.8
3	18.0928	17.6305	17.55	1755	815.6	1041.3	926.4	929.3
3	18.1031	17.6401	17.56	1756	816	1041.7	926.8	929.7
3	18.1135	17.6496	17.57	1757	816.4	1041.8	927.3	930.1
3	18.1238	17.6592	17.58	1758	816.9	1042.6	927.7	930.6
3	18.1342	17.6687	17.59	1759	817.2	1042.8	928.1	931
3	18.1445	17.6783	17.6	1760	817.6	1043.1	928.6	931.5
3	18.1549	17.6879	17.61	1761	818.1	1043.5	929	931.9
3	18.1652	17.6974	17.62	1762	818.8	1043.8	929.5	932.3
3	18.1756	17.707	17.63	1763	819.3	1044.1	930	932.8
3	18.1859	17.7166	17.64	1764	819.8	1044.5	930.5	933.3
3	18.1963	17.7261	17.65	1765	820.2	1044.8	930.9	933.7
3	18.2066	17.7357	17.66	1766	820.6	1045.5	931.3	934.1
3	18.217	17.7452	17.67	1767	820.9	1045.9	931.9	934.5
3	18.2273	17.7548	17.68	1768	821.5	1046.4	932.3	935
3	18.2377	17.7644	17.69	1769	822	1046.8	932.7	935.4
3	18.248	17.7739	17.7	1770	822.2	1047.4	933.2	935.9
3	18.2583	17.7835	17.71	1771	822.6	1047.9	933.7	936.3
3	18.2687	17.7931	17.72	1772	823.4	1048.1	934.2	936.8
3	18.279	17.8026	17.73	1773	823.8	1049	934.5	937.2
3	18.2894	17.8122	17.74	1774	824	1049.5	935	937.7
3	18.2997	17.8217	17.75	1775	824.2	1050.5	935.5	938.1
3	18.3101	17.8313	17.76	1776	824.9	1050.6	936	938.5
3	18.3204	17.8409	17.77	1777	825.7	1051.1	936.4	939
3	18.3308	17.8504	17.78	1778	826.1	1051.8	936.8	939.5
3	18.3411	17.86	17.79	1779	826.4	1051.8	937.2	939.9
3	18.3515	17.8696	17.8	1780	826.7	1052.5	937.7	940.3
3	18.3618	17.8791	17.81	1781	827.3	1053	938.2	940.8
3	18.3722	17.8887	17.82	1782	827.6	1053.8	938.6	941.2
3	18.3825	17.8982	17.83	1783	828.1	1054.4	939	941.7
3	18.3929	17.9078	17.84	1784	828.5	1054.8	939.5	942.1
3	18.4032	17.9174	17.85	1785	829	1055.4	939.9	942.5
3	18.4136	17.9269	17.86	1786	829.4	1056	940.6	943
3	18.4239	17.9365	17.87	1787	829.7	1056.7	941	943.5
3	18.4343	17.9461	17.88	1788	830	1057	941.5	943.9
3	18.4446	17.9556	17.89	1789	830.5	1057.6	941.9	944.3
3	18.4549	17.9652	17.9	1790	830.7	1058.3	942.3	944.8
3	18.4653	17.9747	17.91	1791	830.9	1058.7	942.7	945.2
3	18.4756	17.9843	17.92	1792	831.5	1059.1	943.1	945.7
3	18.486	17.9939	17.93	1793	831.7	1059.9	943.7	946.1
3	18.4963	18.0034	17.94	1794	832.1	1060.5	944.1	946.6
3	18.5067	18.013	17.95	1795	832.8	1061.1	944.5	947.1
3	18.517	18.0225	17.96	1796	833.1	1061.5	944.9	947.5
3	18.5274	18.0321	17.97	1797	833.4	1062.1	945.4	947.9
3	18.5377	18.0417	17.98	1798	833.9	1062.6	945.9	948.3
3	18.5481	18.0512	17.99	1799	833.9	1063.3	946.2	948.8
3	18.5584	18.0608	18	1800	834	1063.7	946.7	949.2
3	18.5688	18.0704	18.01	1801	835	1064	947.2	949.7
3	18.5791	18.0799	18.02	1802	835.6	1064.2	947.7	950.2
3	18.5895	18.0895	18.03	1803	836.1	1064.4	948.2	950.6
3	18.5998	18.099	18.04	1804	836.9	1064.9	948.6	951.1
3	18.6102	18.1086	18.05	1805	837.8	1065.2	949.1	951.6
3	18.6205	18.1182	18.06	1806	838.7	1065.4	949.4	952.1
3	18.6309	18.1277	18.07	1807	839.6	1065.8	949.9	952.6
3	18.6412	18.1373	18.08	1808	840.6	1066.1	950.2	953
3	18.6515	18.1469	18.09	1809	841.5	1066.4	950.7	953.5
3	18.6619	18.1564	18.1	1810	842.2	1066.8	951.2	954
3	18.6722	18.166	18.11	1811	843	1067.1	951.8	954.4
3	18.6826	18.1755	18.12	1812	843.7	1067.4	952.2	954.9
3	18.6929	18.1851	18.13	1813	844.6	1067.8	952.6	955.3
3	18.7033	18.1947	18.14	1814	844.9	1068.1	953.1	955.8
3	18.7136	18.2042	18.15	1815	845.6	1068.3	953.6	956.2
3	18.724	18.2138	18.16	1816	846.5	1068.6	954.2	956.7
3	18.7343	18.2234	18.17	1817	847.1	1068.8	954.6	957.1
3	18.7447	18.2329	18.18	1818	848.2	1069.3	955.1	957.6
3	18.755	18.2425	18.19	1819	848.3	1069.8	955.5	958.1
3	18.7654	18.252	18.2	1820	849.4	1070	956	958.6
3	18.7757	18.2616	18.21	1821	850.1	1070.4	956.5	959
3	18.7861	18.2712	18.22	1822	851	1070.7	957	959.5
3	18.7964	18.2807	18.23	1823	851.7	1071	957.4	960
3	18.8068	18.2903	18.24	1824	852.4	1071.6	957.9	960.5
3	18.8171	18.2999	18.25	1825	853.3	1071.9	958.3	960.9
3	18.8275	18.3094	18.26	1826	853.8	1072.3	958.9	961.4
3	18.8378	18.319	18.27	1827	854.9	1072.9	959.3	961.9
3	18.8481	18.3285	18.28	1828	855.5	1073.2	959.8	962.3
3	18.8585	18.3381	18.29	1829	856	1073.7	960.2	962.8
3	18.8688	18.3477	18.3	1830	856.8	1074.3	960.6	963.3
3	18.8792	18.3572	18.31	1831	857.4	1074.6	961.1	963.7
3	18.8895	18.3668	18.32	1832	858.1	1075	961.5	964.2
3	18.8999	18.3764	18.33	1833	858.8	1075.1	962.1	964.7
3	18.9102	18.3859	18.34	1834	859.5	1075.4	962.4	965.1
3	18.9206	18.3955	18.35	1835	859.8	1075.8	963.1	965.6
3	18.9309	18.405	18.36	1836	860.5	1076.1	963.5	966
3	18.9413	18.4146	18.37	1837	861.1	1076.6	964.1	966.5
3	18.9516	18.4242	18.38	1838	861.7	1077.3	964.5	967
3	18.962	18.4337	18.39	1839	862.2	1077.6	964.9	967.5
3	18.9723	18.4433	18.4	1840	862.8	1078.1	965.3	967.9
3	18.9827	18.4529	18.41	1841	863.5	1078.5	965.9	968.4
3	18.993	18.4624	18.42	1842	864	1079.1	966.2	968.9
3	19.0034	18.472	18.43	1843	864.3	1079.5	966.7	969.4
3	19.0137	18.4815	18.44	1844	865	1080.1	967	969.8
3	19.0241	18.4911	18.45	1845	865.4	1080.7	967.5	970.3
3	19.0344	18.5007	18.46	1846	865.9	1081.2	967.8	970.7
3	19.0447	18.5102	18.47	1847	866.4	1081.6	968.3	971.2
3	19.0551	18.5198	18.48	1848	866.8	1082.1	968.8	971.6
3	19.0654	18.5293	18.49	1849	867.3	1082.5	969.3	972.1
3	19.0758	18.5389	18.5	1850	867.5	1082.6	969.7	972.5
3	19.0861	18.5485	18.51	1851	868.2	1083.3	970.2	973
3	19.0965	18.558	18.52	1852	868.7	1083.8	970.6	973.4
3	19.1068	18.5676	18.53	1853	869	1084.1	971.1	973.9
3	19.1172	18.5772	18.54	1854	869.5	1084.5	971.7	974.4
3	19.1275	18.5867	18.55	1855	869.8	1084.9	972.2	974.9
3	19.1379	18.5963	18.56	1856	870.3	1085.3	972.6	975.3
3	19.1482	18.6058	18.57	1857	871.2	1086	973.1	975.8
3	19.1586	18.6154	18.58	1858	871.6	1086.3	973.7	976.2
3	19.1689	18.625	18.59	1859	872.2	1086.9	974.1	976.7
3	19.1793	18.6345	18.6	1860	872.9	1087.3	974.6	977.2
3	19.1896	18.6441	18.61	1861	873.3	1088.2	975.1	977.7
3	19.2	18.6537	18.62	1862	873.8	1088.7	975.5	978.1
3	19.2103	18.6632	18.63	1863	874.3	1089	976	978.6
3	19.2207	18.6728	18.64	1864	874.6	1089.5	976.4	979
3	19.231	18.6823	18.65	1865	875.1	1089.9	976.9	979.4
3	19.2413	18.6919	18.66	1866	875.6	1090.6	977.4	979.9
3	19.2517	18.7015	18.67	1867	875.8	1091	977.8	980.4
3	19.262	18.711	18.68	1868	876.6	1091.5	978.3	980.9
3	19.2724	18.7206	18.69	1869	876.9	1092	978.8	981.3
3	19.2827	18.7302	18.7	1870	877.3	1092.5	979.2	981.8
3	19.2931	18.7397	18.71	1871	877.8	1093	979.6	982.2
3	19.3034	18.7493	18.72	1872	878.1	1093.5	980.2	982.7
3	19.3138	18.7588	18.73	1873	878.4	1094.2	980.7	983.1
3	19.3241	18.7684	18.74	1874	878.9	1094.8	981.2	983.6
3	19.3345	18.778	18.75	1875	879.3	1095.5	981.5	984.1
3	19.3448	18.7875	18.76	1876	879.7	1096.1	981.9	984.5
3	19.3552	18.7971	18.77	1877	880	1097.1	982.3	985
3	19.3655	18.8067	18.78	1878	880.3	1097.5	982.9	985.4
3	19.3759	18.8162	18.79	1879	880.6	1097.9	983.4	985.9
3	19.3862	18.8258	18.8	1880	881	1098.4	983.9	986.4
3	19.3966	18.8353	18.81	1881	881.4	1098.9	984.4	986.8
3	19.4069	18.8449	18.82	1882	881.8	1099.6	984.9	987.3
3	19.4173	18.8545	18.83	1883	882.2	1100.1	985.3	987.8
3	19.4276	18.864	18.84	1884	882.7	1100.7	985.8	988.2
3	19.4379	18.8736	18.85	1885	883	1100.9	986.2	988.7
3	19.4483	18.8832	18.86	1886	883.4	1101.2	986.7	989.1
3	19.4586	18.8927	18.87	1887	883.9	1102.1	987.2	989.6
3	19.469	18.9023	18.88	1888	884.3	1102.5	987.7	990.1
3	19.498	18.9291	18.89	1889	884.7	1103.4	988.1	990.5
3	19.5097	18.9399	18.9	1890	885	1103.9	988.6	990.9
3	19.52	18.9494	18.91	1891	885.3	1104.4	989.1	991.4
3	19.5304	18.959	18.92	1892	885.9	1104.9	989.5	991.9
3	19.5407	18.9686	18.93	1893	885.9	1105.8	989.9	992.3
3	19.5511	18.9781	18.94	1894	886.3	1106.4	990.5	992.8
3	19.5614	18.9877	18.95	1895	886.5	1107.1	990.9	993.3
3	19.5718	18.9973	18.96	1896	887	1107.7	991.4	993.7
3	19.5821	19.0068	18.97	1897	887.3	1108.1	991.8	994.2
3	19.5925	19.0164	18.98	1898	887.4	1108.7	992.3	994.7
3	19.6028	19.0259	18.99	1899	887.7	1109.2	992.8	995.1
3	19.6132	19.0355	19	1900	888.3	1110	993.3	995.6
3	19.6235	19.0451	19.01	1901	889	1110.3	993.7	996
3	19.6339	19.0546	19.02	1902	889.1	1110.6	994	996.4
3	19.6442	19.0642	19.03	1903	889.8	1111	994.4	996.8
3	19.6545	19.0738	19.04	1904	890.3	1111.1	994.8	997.2
3	19.6649	19.0833	19.05	1905	891	1111.3	995.2	997.6
3	19.6752	19.0929	19.06	1906	891.1	1111.3	995.8	998.1
3	19.6856	19.1024	19.07	1907	892	1111.6	996.1	998.5
3	19.6959	19.112	19.08	1908	892.8	1112.1	996.4	998.9
3	19.7063	19.1216	19.09	1909	893.8	1112.3	996.8	999.4
3	19.7166	19.1311	19.1	1910	894.3	1112.6	997.2	999.8
3	19.727	19.1407	19.11	1911	895	1112.8	997.7	1000.2
3	19.7373	19.1503	19.12	1912	895.2	1113.3	998.1	1000.6
3	19.7477	19.1598	19.13	1913	895.5	1113.6	998.5	1001
3	19.758	19.1694	19.14	1914	896.3	1113.7	998.9	1001.5
3	19.7684	19.1789	19.15	1915	896.6	1114.3	999.3	1001.8
3	19.7787	19.1885	19.16	1916	897.2	1114.6	999.6	1002.2
3	19.7891	19.1981	19.17	1917	897.5	1114.8	1000.1	1002.6
3	19.7994	19.2076	19.18	1918	898	1115.3	1000.5	1003.1
3	19.8098	19.2172	19.19	1919	898.3	1115.7	1000.7	1003.5
3	19.8201	19.2268	19.2	1920	898.9	1116	1001.2	1003.9
3	19.8305	19.2363	19.21	1921	899.3	1116.3	1001.6	1004.3
3	19.8408	19.2459	19.22	1922	899.9	1116.6	1002.1	1004.7
3	19.8511	19.2554	19.23	1923	900.2	1117	1002.5	1005.2
3	19.8615	19.265	19.24	1924	900.4	1117.5	1002.9	1005.6
3	19.8718	19.2746	19.25	1925	901	1117.7	1003.3	1006
3	19.8822	19.2841	19.26	1926	901.2	1118.1	1003.7	1006.4
3	19.8925	19.2937	19.27	1927	901.9	1118.3	1004.2	1006.8
3	19.9029	19.3032	19.28	1928	902.4	1118.7	1004.6	1007.3
3	19.9132	19.3128	19.29	1929	902.8	1119	1005	1007.7
3	19.9236	19.3224	19.3	1930	903.4	1119.2	1005.5	1008.2
3	19.9339	19.3319	19.31	1931	903.8	1119.5	1005.8	1008.5
3	19.9443	19.3415	19.32	1932	904.2	1120.1	1006.2	1009
3	19.9546	19.3511	19.33	1933	904.7	1120.4	1006.7	1009.4
3	19.965	19.3606	19.34	1934	905.2	1121	1007.1	1009.8
3	19.9753	19.3702	19.35	1935	905.9	1121.2	1007.5	1010.2
3	19.9857	19.3797	19.36	1936	906.1	1121.7	1007.9	1010.7
3	19.996	19.3893	19.37	1937	906.6	1122.3	1008.3	1011.1
3	20.0064	19.3989	19.38	1938	907	1122.5	1008.8	1011.5
3	20.0167	19.4084	19.39	1939	907.4	1122.7	1009.2	1012
3	20.0271	19.418	19.4	1940	907.7	1123	1009.6	1012.4
3	20.0374	19.4276	19.41	1941	907.9	1123.2	1010	1012.8
3	20.0477	19.4371	19.42	1942	908.5	1123.4	1010.4	1013.2
3	20.0581	19.4467	19.43	1943	908.9	1123.9	1010.7	1013.6
3	20.0684	19.4562	19.44	1944	909.6	1124.3	1011.1	1014
3	20.0788	19.4658	19.45	1945	910	1124.6	1011.5	1014.4
3	20.0891	19.4754	19.46	1946	910.5	1125.1	1012	1014.9
3	20.0995	19.4849	19.47	1947	910.9	1125.3	1012.3	1015.3
3	20.1098	19.4945	19.48	1948	911.4	1125.9	1012.9	1015.7
3	20.1202	19.5041	19.49	1949	911.8	1126.3	1013.2	1016.1
3	20.1305	19.5136	19.5	1950	912.2	1126.7	1013.7	1016.6
3	20.1409	19.5232	19.51	1951	912.8	1127.2	1014.1	1017
3	20.1512	19.5327	19.52	1952	913.1	1127.4	1014.5	1017.4
3	20.1616	19.5423	19.53	1953	913.6	1127.7	1014.9	1017.8
3	20.1719	19.5519	19.54	1954	913.8	1128.2	1015.4	1018.3
3	20.1823	19.5614	19.55	1955	914.2	1128.6	1015.8	1018.7
3	20.1926	19.571	19.56	1956	914.6	1129	1016.2	1019.1
3	20.203	19.5806	19.57	1957	915.1	1129.2	1016.7	1019.5
3	20.2133	19.5901	19.58	1958	915.4	1129.6	1017.1	1019.9
3	20.2237	19.5997	19.59	1959	916	1129.9	1017.5	1020.3
3	20.234	19.6092	19.6	1960	916.1	1130.2	1017.9	1020.7
3	20.2443	19.6188	19.61	1961	916.4	1130.8	1018.3	1021.1
3	20.2547	19.6284	19.62	1962	916.9	1131.2	1018.8	1021.6
3	20.265	19.6379	19.63	1963	916.9	1131.7	1019.2	1022
3	20.2754	19.6475	19.64	1964	917.5	1132.2	1019.7	1022.4
3	20.2857	19.6571	19.65	1965	917.8	1132.4	1020	1022.8
3	20.2961	19.6666	19.66	1966	917.9	1132.8	1020.5	1023.2
3	20.3064	19.6762	19.67	1967	918.4	1133.3	1020.9	1023.7
3	20.3168	19.6857	19.68	1968	918.7	1133.9	1021.5	1024.1
3	20.3271	19.6953	19.69	1969	919.2	1134.2	1022	1024.6
3	20.3375	19.7049	19.7	1970	919.5	1134.6	1022.4	1025
3	20.3478	19.7144	19.71	1971	919.7	1134.7	1022.8	1025.4
3	20.3582	19.724	19.72	1972	920.1	1135	1023.2	1025.8
3	20.3685	19.7336	19.73	1973	920.5	1135.5	1023.7	1026.2
3	20.3789	19.7431	19.74	1974	920.9	1135.8	1024	1026.7
3	20.3892	19.7527	19.75	1975	921	1136.4	1024.4	1027.1
3	20.3996	19.7622	19.76	1976	921	1136.8	1024.8	1027.4
3	20.4099	19.7718	19.77	1977	921.6	1137.6	1025.3	1027.9
3	20.4203	19.7814	19.78	1978	921.7	1138	1025.7	1028.4
3	20.4306	19.7909	19.79	1979	922	1138.4	1026.1	1028.8
3	20.4409	19.8005	19.8	1980	922.4	1138.9	1026.5	1029.1
3	20.4513	19.81	19.81	1981	922.5	1139.3	1027	1029.6
3	20.4616	19.8196	19.82	1982	923	1139.8	1027.4	1030
3	20.472	19.8292	19.83	1983	923.2	1140.2	1027.8	1030.4
3	20.4823	19.8387	19.84	1984	923.4	1140.7	1028.2	1030.9
3	20.4927	19.8483	19.85	1985	923.8	1141.1	1028.7	1031.3
3	20.503	19.8579	19.86	1986	924.1	1141.7	1029.2	1031.7
3	20.5134	19.8674	19.87	1987	924.4	1142	1029.6	1032.1
3	20.5237	19.877	19.88	1988	924.7	1142.7	1030.1	1032.5
3	20.5341	19.8865	19.89	1989	925	1143.2	1030.5	1033
3	20.5444	19.8961	19.9	1990	925.1	1143.7	1031	1033.4
3	20.5548	19.9057	19.91	1991	925.4	1144.2	1031.5	1033.8
3	20.5651	19.9152	19.92	1992	925.6	1144.5	1032	1034.2
3	20.5755	19.9248	19.93	1993	926	1145.4	1032.4	1034.7
3	20.5858	19.9344	19.94	1994	926.1	1145.9	1032.7	1035
3	20.5962	19.9439	19.95	1995	926.5	1146.5	1033.3	1035.5
3	20.6065	19.9535	19.96	1996	926.7	1146.9	1033.7	1035.9
3	20.6169	19.963	19.97	1997	926.9	1147.5	1034.1	1036.3
3	20.6272	19.9726	19.98	1998	927.3	1148	1034.6	1036.8
3	20.6375	19.9822	19.99	1999	927.5	1148.5	1035	1037.2
3	20.6479	19.9917	20	2000	927.7	1149.4	1035.5	1037.6
3	20.6582	20.0013	20.01	2001	928.1	1149.5	1035.9	1038
3	20.6686	20.0109	20.02	2002	928.9	1149.8	1036.3	1038.4
3	20.6789	20.0204	20.03	2003	929.3	1149.9	1036.6	1038.8
3	20.6893	20.03	20.04	2004	930.1	1150.1	1036.9	1039.3
3	20.6996	20.0395	20.05	2005	930.8	1150.5	1037.4	1039.7
3	20.71	20.0491	20.06	2006	931.2	1150.5	1037.7	1040.1
3	20.7203	20.0587	20.07	2007	931.6	1150.9	1038	1040.5
3	20.7307	20.0682	20.08	2008	932	1151.1	1038.5	1040.9
3	20.741	20.0778	20.09	2009	932.8	1151.4	1038.9	1041.3
3	20.7514	20.0874	20.1	2010	933.7	1151.7	1039.3	1041.7
3	20.7617	20.0969	20.11	2011	934.2	1152.2	1039.7	1042.1
3	20.7721	20.1065	20.12	2012	934.7	1152.4	1040.1	1042.5
3	20.7824	20.116	20.13	2013	935.1	1152.8	1040.4	1042.9
3	20.7928	20.1256	20.14	2014	935.5	1153	1040.8	1043.3
3	20.8031	20.1352	20.15	2015	936	1153.3	1041.3	1043.8
3	20.8135	20.1447	20.16	2016	936.6	1153.5	1041.6	1044.1
3	20.8238	20.1543	20.17	2017	937	1153.7	1042	1044.6
3	20.8341	20.1639	20.18	2018	938	1153.9	1042.4	1045
3	20.8445	20.1734	20.19	2019	938.5	1154.3	1042.9	1045.4
3	20.8548	20.183	20.2	2020	939.1	1154.5	1043.4	1045.9
3	20.8652	20.1925	20.21	2021	940	1154.7	1043.7	1046.3
3	20.8755	20.2021	20.22	2022	940.2	1155	1044.2	1046.7
3	20.8859	20.2117	20.23	2023	940.8	1155.2	1044.8	1047.1
3	20.8962	20.2212	20.24	2024	941.3	1155.6	1045.2	1047.4
3	20.9066	20.2308	20.25	2025	941.6	1156.1	1045.5	1047.8
3	20.9169	20.2404	20.26	2026	941.9	1156.2	1045.9	1048.3
3	20.9273	20.2499	20.27	2027	942.5	1156.4	1046.2	1048.7
3	20.9376	20.2595	20.28	2028	942.9	1157	1046.7	1049.1
3	20.948	20.269	20.29	2029	943.4	1157.3	1047.2	1049.5
3	20.9583	20.2786	20.3	2030	944.1	1157.4	1047.5	1049.9
3	20.9687	20.2882	20.31	2031	945	1157.9	1047.9	1050.3
3	20.979	20.2977	20.32	2032	945.4	1158	1048.4	1050.7
3	20.9894	20.3073	20.33	2033	945.7	1158.3	1048.8	1051.1
3	20.9997	20.3168	20.34	2034	946.1	1158.6	1049.1	1051.5
3	21.0101	20.3264	20.35	2035	946.4	1159.1	1049.6	1051.9
3	21.0204	20.336	20.36	2036	946.8	1159.5	1050	1052.4
3	21.0307	20.3455	20.37	2037	947.2	1159.7	1050.5	1052.8
3	21.0411	20.3551	20.38	2038	947.7	1159.9	1050.9	1053.2
3	21.0514	20.3647	20.39	2039	948	1160.1	1051.5	1053.5
3	21.0618	20.3742	20.4	2040	948.6	1160.3	1051.8	1054
3	21.0721	20.3838	20.41	2041	949.3	1160.6	1052.3	1054.3
3	21.0825	20.3933	20.42	2042	949.6	1160.7	1052.8	1054.8
3	21.0928	20.4029	20.43	2043	950.3	1160.8	1053.3	1055.2
3	21.1032	20.4125	20.44	2044	950.5	1161.3	1053.7	1055.6
3	21.1135	20.422	20.45	2045	950.8	1161.7	1054.2	1056
3	21.1239	20.4316	20.46	2046	951.4	1162.3	1054.5	1056.4
3	21.1342	20.4412	20.47	2047	951.7	1162.6	1054.9	1056.8
3	21.1446	20.4507	20.48	2048	952.4	1162.9	1055.2	1057.2
3	21.1549	20.4603	20.49	2049	952.6	1163.3	1055.7	1057.6
3	21.1653	20.4698	20.5	2050	953	1163.6	1056.1	1058
3	21.1756	20.4794	20.51	2051	953.1	1164.2	1056.5	1058.4
3	21.186	20.489	20.52	2052	953.5	1164.7	1056.9	1058.9
3	21.1963	20.4985	20.53	2053	953.7	1165.2	1057.3	1059.3
3	21.2067	20.5081	20.54	2054	954	1165.4	1057.8	1059.7
3	21.217	20.5177	20.55	2055	954.6	1166	1058.3	1060.2
3	21.2273	20.5272	20.56	2056	955	1166.6	1058.8	1060.6
3	21.2377	20.5368	20.57	2057	955.2	1166.7	1059.2	1061
3	21.248	20.5463	20.58	2058	955.7	1167.2	1059.7	1061.4
3	21.2584	20.5559	20.59	2059	956.1	1167.4	1060.1	1061.8
3	21.2687	20.5655	20.6	2060	956.5	1167.8	1060.5	1062.2
3	21.2791	20.575	20.61	2061	956.7	1168.3	1060.8	1062.6
3	21.2894	20.5846	20.62	2062	956.8	1168.6	1061.3	1063
3	21.2998	20.5942	20.63	2063	957.4	1169.3	1061.7	1063.4
3	21.3101	20.6037	20.64	2064	957.6	1169.2	1062.1	1063.8
3	21.3205	20.6133	20.65	2065	957.9	1169.7	1062.6	1064.2
3	21.3308	20.6228	20.66	2066	958.5	1170.2	1063	1064.6
3	21.3412	20.6324	20.67	2067	958.8	1170.6	1063.3	1065
3	21.3515	20.642	20.68	2068	959.1	1171.2	1063.9	1065.4
3	21.3619	20.6515	20.69	2069	959.8	1171.5	1064.3	1065.8
3	21.3722	20.6611	20.7	2070	960	1171.8	1064.8	1066.2
3	21.3826	20.6707	20.71	2071	960.3	1172.3	1065.2	1066.7
3	21.3929	20.6802	20.72	2072	960.6	1172.3	1065.6	1067
3	21.4033	20.6898	20.73	2073	961	1172.9	1065.9	1067.5
3	21.4136	20.6993	20.74	2074	961.2	1173.3	1066.3	1067.9
3	21.4239	20.7089	20.75	2075	961.5	1173.6	1066.7	1068.3
3	21.4343	20.7185	20.76	2076	961.6	1174	1067.1	1068.7
3	21.4446	20.728	20.77	2077	962.1	1174.5	1067.6	1069.1
3	21.455	20.7376	20.78	2078	962.5	1175	1067.9	1069.6
3	21.4653	20.7471	20.79	2079	962.9	1175.6	1068.5	1069.9
3	21.4757	20.7567	20.8	2080	963.3	1176.2	1068.9	1070.3
3	21.486	20.7663	20.81	2081	963.4	1176.6	1069.2	1070.7
3	21.4964	20.7758	20.82	2082	963.9	1177	1069.6	1071.1
3	21.5067	20.7854	20.83	2083	964.2	1177.5	1070	1071.5
3	21.5171	20.795	20.84	2084	964.5	1177.8	1070.5	1071.9
3	21.5274	20.8045	20.85	2085	964.7	1178.4	1070.9	1072.3
3	21.5378	20.8141	20.86	2086	965	1179.2	1071.3	1072.8
3	21.5481	20.8236	20.87	2087	965.4	1179.7	1071.8	1073.2
3	21.5585	20.8332	20.88	2088	965.9	1180.2	1072.2	1073.6
3	21.5688	20.8428	20.89	2089	966.3	1180.5	1072.6	1074
3	21.5792	20.8523	20.9	2090	966.6	1181.3	1073.1	1074.4
3	21.5895	20.8619	20.91	2091	966.9	1181.6	1073.5	1074.9
3	21.5999	20.8715	20.92	2092	966.9	1182	1074	1075.2
3	21.6102	20.881	20.93	2093	967.3	1182.5	1074.3	1075.7
3	21.6205	20.8906	20.94	2094	967.5	1183.2	1074.8	1076.1
3	21.6309	20.9001	20.95	2095	967.9	1183.5	1075.2	1076.5
3	21.6412	20.9097	20.96	2096	968.3	1184	1075.7	1076.9
3	21.6516	20.9193	20.97	2097	968.4	1184.6	1076	1077.3
3	21.6677	20.9342	20.98	2098	968.8	1185.1	1076.4	1077.7
3	21.7023	20.9661	20.99	2099	968.9	1185.6	1076.8	1078.1
3	21.7126	20.9757	21	2100	969.3	1186.1	1077.2	1078.5
3	21.723	20.9852	21.01	2101	969.6	1186.3	1077.7	1078.9
3	21.7333	20.9948	21.02	2102	970.7	1186.8	1078	1079.3
3	21.7437	21.0044	21.03	2103	971.4	1187	1078.3	1079.8
3	21.754	21.0139	21.04	2104	972	1187.3	1078.8	1080.2
3	21.7644	21.0235	21.05	2105	972.6	1187.4	1079.1	1080.5
3	21.7747	21.0331	21.06	2106	973	1187.7	1079.6	1080.9
3	21.7851	21.0426	21.07	2107	973.7	1188	1079.9	1081.3
3	21.7954	21.0522	21.08	2108	974	1188.3	1080.3	1081.7
3	21.8345	21.0883	21.09	2109	974.6	1188.5	1080.8	1082.1
3	21.8661	21.1175	21.1	2110	975	1188.7	1081.2	1082.5
3	21.8765	21.1271	21.11	2111	975.4	1189.2	1081.6	1082.9
3	21.8868	21.1366	21.12	2112	976.1	1189.4	1082	1083.3
3	21.8971	21.1462	21.13	2113	976.8	1189.7	1082.4	1083.8
3	21.9075	21.1558	21.14	2114	977.1	1189.8	1082.7	1084.2
3	21.9178	21.1653	21.15	2115	977.8	1190.2	1083.2	1084.6
3	21.9282	21.1749	21.16	2116	978.4	1190.2	1083.4	1085
3	21.9385	21.1844	21.17	2117	979.1	1190.6	1083.8	1085.4
3	21.9489	21.194	21.18	2118	979.7	1190.7	1084.2	1085.8
3	21.9592	21.2036	21.19	2119	980.1	1191	1084.7	1086.2
3	21.9696	21.2131	21.2	2120	980.6	1191.2	1085.2	1086.6
3	21.9799	21.2227	21.21	2121	981.1	1191.5	1085.6	1087
3	21.9903	21.2323	21.22	2122	981.6	1191.7	1085.9	1087.4
3	22.0006	21.2418	21.23	2123	982.4	1192.1	1086.4	1087.8
3	22.011	21.2514	21.24	2124	982.7	1192.3	1086.7	1088.2
3	22.0213	21.2609	21.25	2125	983.3	1192.7	1087.1	1088.6
3	22.0317	21.2705	21.26	2126	983.9	1192.8	1087.4	1089
3	22.042	21.2801	21.27	2127	984.6	1193.4	1087.7	1089.4
3	22.0524	21.2896	21.28	2128	985.3	1193.6	1088.2	1089.8
3	22.0627	21.2992	21.29	2129	985.9	1194	1088.7	1090.2
3	22.0731	21.3088	21.3	2130	986.5	1194.2	1089.1	1090.6
3	22.0834	21.3183	21.31	2131	987	1194.5	1089.6	1091
3	22.0937	21.3279	21.32	2132	987.9	1194.6	1090	1091.4
3	22.1041	21.3374	21.33	2133	988.3	1194.8	1090.3	1091.8
3	22.1144	21.347	21.34	2134	988.8	1195.2	1090.8	1092.2
3	22.1248	21.3566	21.35	2135	989.1	1195.5	1091.2	1092.6
3	22.1351	21.3661	21.36	2136	989.5	1195.8	1091.5	1093.1
3	22.1455	21.3757	21.37	2137	989.8	1196.1	1091.9	1093.4
3	22.1558	21.3853	21.38	2138	990.2	1196.5	1092.4	1093.9
3	22.1662	21.3948	21.39	2139	990.6	1196.6	1092.8	1094.3
3	22.1765	21.4044	21.4	2140	991.1	1197	1093.2	1094.6
3	22.1869	21.4139	21.41	2141	991.5	1197.5	1093.6	1095.1
3	22.1972	21.4235	21.42	2142	991.9	1198	1093.9	1095.4
3	22.2076	21.4331	21.43	2143	992.3	1198.2	1094.4	1095.8
3	22.2179	21.4426	21.44	2144	992.7	1198.7	1094.8	1096.2
3	22.2283	21.4522	21.45	2145	993.3	1199	1095.1	1096.7
3	22.2386	21.4618	21.46	2146	993.5	1199.3	1095.6	1097
3	22.249	21.4713	21.47	2147	994.1	1199.9	1096	1097.5
3	22.2593	21.4809	21.48	2148	994.2	1200.4	1096.4	1097.9
3	22.2697	21.4904	21.49	2149	995.1	1200.6	1096.8	1098.3
4	21.5	21.5	21.5	2150	995.3	1200.9	1097.3	1098.6
4	21.5107	21.51	21.51	2151	995.8	1201.4	1097.7	1099
4	21.5215	21.52	21.52	2152	996.2	1201.7	1098	1099.4
4	21.5322	21.53	21.53	2153	996.6	1202.2	1098.5	1099.9
4	21.5429	21.54	21.54	2154	996.9	1202.8	1098.9	1100.3
4	21.5537	21.55	21.55	2155	997.3	1203	1099.2	1100.7
4	21.5644	21.56	21.56	2156	997.8	1203.5	1099.7	1101.1
4	21.5752	21.57	21.57	2157	997.9	1203.9	1100.1	1101.5
4	21.5859	21.58	21.58	2158	998.3	1204	1100.5	1101.9
4	21.5966	21.59	21.59	2159	998.6	1204.4	1100.8	1102.3
4	21.6074	21.6	21.6	2160	998.8	1204.7	1101.3	1102.7
4	21.6181	21.61	21.61	2161	999.2	1204.9	1101.7	1103.1
4	21.6288	21.62	21.62	2162	999.3	1205.3	1102.1	1103.5
4	21.6396	21.63	21.63	2163	999.7	1205.6	1102.6	1103.9
4	21.6503	21.64	21.64	2164	1000.2	1206.2	1102.9	1104.3
4	21.6611	21.65	21.65	2165	1000.5	1206.5	1103.3	1104.7
4	21.6718	21.66	21.66	2166	1000.9	1207	1103.8	1105.1
4	21.6825	21.67	21.67	2167	1001	1207.4	1104.1	1105.5
4	21.6933	21.68	21.68	2168	1001.4	1207.8	1104.7	1105.9
4	21.704	21.69	21.69	2169	1001.6	1208.2	1105	1106.3
4	21.7147	21.7	21.7	2170	1002.1	1208.9	1105.5	1106.7
4	21.7255	21.71	21.71	2171	1002.1	1209.2	1105.9	1107.1
4	21.7362	21.72	21.72	2172	1002.5	1209.8	1106.4	1107.5
4	21.7469	21.73	21.73	2173	1002.9	1210.2	1106.8	1107.9
[truncated: 13,082 more rows]
