# Supplementary material for: Mid-Holocene Antarctic sea-ice increase driven by marine ice sheet retreat
Source: Copernicus journal article supplement (doi:10.5194/cp-2020-3), 2020-02-26
Supplement: Supplementary file 1 [file cp-2020-3-supplement.zip › Data Table S2.xlsx]

## Sheet: Sheet1
DEPTH to Age Lookup Table for MD03_2601_40 - see note on depth scales to the right of this lookup table (rows L to R)
depth (cmbsf)	min (cal yrs BP)	max (cal yrs BP)	median (cal yrs BP)	wmean (cal yrs BP)
0	799.1	1462.7	1120.2	1123.6
1	801.5	1464.1	1122.3	1125.7							This lookup table was generated using BACON using the following parameters:
2	804.3	1466.3	1124.6	1127.9							Bacon("MD03_2601", cc=2, cc2="Marine13", mem.strength=8.5, thick=100, mem.mean=0.85, d.min=0, d.max=3998, MinYr=-200, MaxYr=11700, find.round=2, acc.mean=0.65, acc.shape=1.8, C14.border=rgb(0, 0, 0, 1), C14.col=rgb(0, 0, 1, 1))
3	807.5	1468.2	1126.8	1130
4	809.1	1469.2	1129.4	1132.4							The starting file was:
5	812.9	1469.4	1131.6	1134.6
6	815.1	1471	1133.7	1136.7							labID	age	error	depth	cc	dR	dSTD
7	818.2	1473	1136	1139							2	2350	70	2	2	800	100
8	821	1474.6	1138.2	1141.2							498	3235	30	498	2	800	100
9	823.7	1475.8	1140.5	1143.5							998	5175	60	998	2	800	100
10	825.6	1477.5	1143	1145.8							1498	6135	35	1498	2	800	100
11	827.5	1479.8	1145	1148							1998	6310	100	1998	2	800	100
12	831.4	1481.3	1147.1	1150.3							2498	7450	40	2498	2	800	100
13	834.2	1482.2	1149.7	1152.6							2998	8775	40	2998	2	800	100
14	837.7	1484.8	1151.5	1154.7							3498	9570	50	3498	2	800	100
15	840.6	1486.4	1153.5	1156.9							3998	10855	45	3998	2	800	100
16	842.1	1489	1155.5	1159
17	843.7	1489.7	1157.5	1161.2
18	845.9	1491.5	1159.6	1163.2
19	848.5	1493.2	1162	1165.4
20	852	1494.3	1164.1	1167.6
21	854	1496	1166.1	1169.7
22	856.6	1499	1168.4	1171.9
23	859.4	1501.1	1170.8	1174.1
24	863.3	1503.1	1172.7	1176.4
25	865.3	1504.6	1175	1178.5
26	867.5	1507.1	1177.5	1180.8
27	868.9	1509.1	1179.5	1182.9
28	871	1511.8	1181.9	1185.3
29	874.2	1513.7	1183.6	1187.4
30	876.3	1514.9	1185.8	1189.6
31	878	1516.7	1187.7	1191.8
32	879.7	1519.5	1189.9	1194.1
33	881.9	1521.8	1192.1	1196.4
34	883.9	1524.9	1194.2	1198.6
35	886.6	1527.6	1197.2	1200.8
36	889.2	1530.4	1199.2	1203.1
37	891	1533.4	1201.2	1205.2
38	893.1	1535.9	1203.6	1207.4
39	895.6	1539.1	1205.8	1209.6
40	896.9	1540.7	1208.1	1211.8
41	899.7	1542.9	1210.1	1214
42	901.1	1545.5	1212.1	1216
43	902.7	1548.2	1214.3	1218.1
44	904.6	1550.9	1216.5	1220.4
45	906.8	1552.1	1218.8	1222.6
46	908.7	1554.9	1220.8	1224.8
47	909.7	1557.9	1223.2	1227.2
48	911.4	1559.8	1225.1	1229.3
49	913.1	1561.9	1227.2	1231.4
50	914.3	1565.4	1229.2	1233.7
51	916	1567.3	1231.3	1235.9
52	918.6	1569.2	1233.4	1238.2
53	920.1	1572.2	1235.6	1240.4
54	921.3	1575.3	1237.7	1242.7
55	922.5	1578.8	1239.6	1244.9
56	924.4	1582.7	1241.7	1247.2
57	926.6	1587.7	1243.6	1249.4
58	928.1	1590.5	1245.7	1251.5
59	929.5	1594	1247.8	1253.7
60	930.7	1596.6	1249.9	1255.8
61	932.7	1598.3	1251.9	1258
62	933.7	1601.2	1253.9	1260.3
63	935.7	1605.6	1256	1262.5
64	937.3	1608.6	1258.1	1264.8
65	938.4	1611.8	1260	1267
66	939.3	1616.7	1262	1269.3
67	940.8	1619.3	1264.1	1271.4
68	942.4	1622.5	1266	1273.6
69	943.4	1626.9	1268.4	1276
70	944.7	1630.6	1270.4	1278.2
71	946.5	1634.2	1272.6	1280.5
72	948	1638.9	1274.7	1282.7
73	949.4	1641.7	1276.6	1284.8
74	950.9	1644.2	1278.6	1286.9
75	951.9	1649.1	1280.8	1289.1
76	953.6	1652.4	1282.7	1291.2
77	955.3	1656	1284.6	1293.4
78	957	1660.8	1286.6	1295.6
79	958.5	1664.2	1288.7	1297.8
80	960.4	1670.2	1291	1300.2
81	961.6	1674.1	1293.1	1302.4
82	962.4	1676.9	1295.3	1304.6
83	963.9	1681.7	1297.2	1306.6
84	964.8	1684.8	1299.2	1308.9
85	966.9	1687.6	1301	1310.9
86	967.4	1691	1303	1313.3
87	969.1	1694.9	1304.8	1315.5
88	970.3	1699.1	1307.2	1317.9
89	971.7	1702.2	1309.1	1320.1
90	972.3	1707.2	1310.9	1322.2
91	973.1	1711.2	1313.2	1324.3
92	973.6	1714	1315.1	1326.4
93	975.3	1718.2	1316.8	1328.6
94	976.2	1723.4	1318.9	1330.9
95	977.6	1728.4	1320.9	1333.1
96	978.6	1732.1	1322.6	1335.3
97	980.1	1737.1	1324.7	1337.7
98	981.9	1740.1	1326.8	1339.9
99	982.7	1744.3	1328.8	1342.1
100	984.1	1748.5	1330.7	1344.2
101	985.3	1750.3	1332.8	1346.4
102	987.9	1751.4	1335.2	1348.6
103	990.4	1753.6	1337.4	1350.8
104	993.3	1754.7	1339.6	1353.1
105	995.8	1757.3	1341.8	1355.4
106	998	1759.3	1344.2	1357.5
107	999.9	1759.9	1346.8	1359.6
108	1001.4	1761.2	1349.3	1361.7
109	1003.5	1763.7	1351.7	1364.1
110	1006.5	1765	1354.2	1366.4
111	1008.4	1767.2	1356.2	1368.7
112	1010.5	1768.9	1358.3	1370.9
113	1012	1771.3	1360.1	1373
114	1014.5	1773	1362.7	1375.3
115	1017.1	1775.9	1364.7	1377.4
116	1020.3	1777.9	1367.2	1379.5
117	1022.5	1780.6	1369.2	1381.7
118	1024.3	1782.1	1371.7	1384
119	1025.6	1783.4	1373.7	1386.1
120	1028.3	1785.2	1376.2	1388.5
121	1030.3	1787.1	1378.5	1390.6
122	1032.9	1790.7	1380.7	1393
123	1034.1	1792.1	1382.9	1395
124	1036.8	1793.7	1385.4	1397.4
125	1038.8	1795	1387.7	1399.6
126	1041	1797	1390.4	1401.9
127	1042.8	1799.5	1392.7	1404
128	1044.1	1801.8	1395	1406.2
129	1046.2	1805.5	1397.2	1408.3
130	1047.3	1806.3	1399.5	1410.7
131	1048.8	1808.4	1401.8	1412.8
132	1051.7	1809.5	1404.2	1415
133	1053.9	1812.5	1406.5	1417.1
134	1056.5	1815	1408.8	1419.3
135	1058.4	1818.1	1411.3	1421.5
136	1060.3	1820.3	1413.4	1423.6
137	1061.1	1823.6	1415.6	1425.8
138	1063	1826.3	1418.1	1428.1
139	1065.1	1827.9	1420.3	1430.3
140	1067.6	1830.3	1422.8	1432.6
141	1068.8	1832.2	1425.4	1434.7
142	1071.3	1834.5	1427.8	1436.9
143	1072.6	1836.1	1430.2	1439.1
144	1074.3	1837.8	1432.4	1441.2
145	1076.1	1840.4	1434.6	1443.4
146	1077.9	1843.3	1436.3	1445.5
147	1079.8	1845.3	1438.1	1447.6
148	1081.2	1847.5	1440.5	1449.9
149	1083.2	1851	1442.6	1452.2
150	1084.2	1853.6	1444.7	1454.4
151	1085.6	1855.4	1446.8	1456.5
152	1086.9	1857.4	1449.2	1458.7
153	1087.6	1859.4	1451.5	1460.9
154	1089.7	1862	1453.8	1463.1
155	1090.6	1864.1	1456	1465.2
156	1092.3	1864.8	1458	1467.3
157	1094.2	1867.3	1460.5	1469.6
158	1095.5	1871.4	1462.9	1471.8
159	1097.3	1874.1	1465.3	1473.9
160	1099.3	1876.8	1467.5	1476
161	1100.7	1880.5	1469.6	1478.1
162	1102.1	1882.3	1471.9	1480.1
163	1103.4	1885.1	1474.3	1482.3
164	1104.8	1886.2	1476.7	1484.6
165	1106.4	1889.6	1478.9	1486.9
166	1108.5	1892.5	1481.2	1489.1
167	1110.1	1894.8	1482.9	1491.1
168	1110.9	1898.5	1485	1493.4
169	1111.2	1902.1	1487.3	1495.6
170	1111.5	1904.6	1489.3	1497.9
171	1113.1	1906.9	1491.3	1500
172	1114.2	1909.5	1493.4	1502.1
173	1115.7	1914	1495.7	1504.5
174	1116.3	1916.4	1497.5	1506.6
175	1118.1	1919.9	1499.6	1508.8
176	1119.5	1922.3	1501.8	1511
177	1120.9	1925.7	1504.2	1513.4
178	1122.1	1927.9	1506.6	1515.5
179	1123.9	1931.3	1508.4	1517.6
180	1124.9	1935.2	1510.8	1519.7
181	1125.6	1939	1512.8	1521.8
182	1126.4	1942.7	1515	1524
183	1128.3	1946.7	1517	1526.3
184	1129.6	1949.8	1519.5	1528.6
185	1131	1954.3	1521.6	1530.7
186	1132.9	1956.7	1523.9	1532.9
187	1133.7	1959.2	1526.5	1535.1
188	1135.9	1963.9	1528.8	1537.3
189	1137.1	1967.7	1531	1539.6
190	1137.1	1971.7	1533.3	1541.7
191	1137.6	1974.7	1535.4	1543.7
192	1139.3	1979.4	1537.3	1545.9
193	1140.2	1983.3	1539.4	1548.1
194	1141.6	1985	1541.3	1550.2
195	1143	1989.8	1543.1	1552.3
196	1144.2	1993.9	1544.6	1554.4
197	1144.3	1998.4	1546.5	1556.6
198	1145.7	2003.6	1548.4	1558.8
199	1147.4	2007.8	1550.5	1561.1
200	1149	2010.8	1552.5	1563.4
201	1151.9	2013.8	1554.6	1565.5
202	1154.8	2015.2	1556.7	1567.6
203	1158.6	2016.4	1558.4	1569.7
204	1162.8	2016.8	1560.6	1571.8
205	1165.4	2019.4	1562.9	1573.9
206	1168.6	2021	1565.3	1576.1
207	1171.6	2022.6	1567.3	1578.1
208	1175.1	2023.1	1569.5	1580.3
209	1177.1	2024.6	1571.4	1582.5
210	1180.2	2026.6	1573.6	1584.5
211	1182.5	2028.5	1575.3	1586.6
212	1186	2031	1577.2	1588.8
213	1189.8	2032.7	1579.5	1591
214	1193	2034	1581.6	1593.1
215	1196.9	2034.7	1583.7	1595.2
216	1200	2036	1586.2	1597.3
217	1202.3	2036.6	1588.7	1599.5
218	1204.6	2037.5	1590.7	1601.7
219	1207.4	2038.9	1592.7	1603.9
220	1210.4	2040.8	1594.8	1606
221	1212.6	2041.8	1596.7	1608
222	1216.1	2043.5	1598.7	1610.2
223	1220.1	2045.7	1600.9	1612.3
224	1222.3	2050.1	1603	1614.6
225	1224	2052.1	1605.3	1616.7
226	1226.7	2053.8	1607.3	1618.9
227	1228.3	2055	1609.6	1621
228	1230.7	2056.3	1611.8	1623.2
229	1233.2	2058.8	1614.1	1625.5
230	1235.5	2060.5	1616.2	1627.5
231	1238.4	2061.6	1618.8	1629.7
232	1241	2063.6	1621.1	1631.9
233	1243.4	2064.8	1623.7	1634.1
234	1246.5	2066.7	1625.7	1636.2
235	1248.7	2069	1627.7	1638.3
236	1250.1	2070.7	1629.6	1640.5
237	1251.9	2072.8	1631.9	1642.8
238	1254.3	2073.8	1634	1644.7
239	1256.6	2076.8	1636.4	1646.8
240	1257.8	2077.6	1638.5	1649
241	1261	2080.8	1640.9	1651.2
242	1263.3	2082.4	1643.1	1653.3
243	1264.8	2084.5	1645.5	1655.5
244	1267.4	2086.2	1647.7	1657.6
245	1269.3	2088	1649.8	1659.8
246	1271	2090.1	1652.5	1662
247	1273.1	2092.1	1654.9	1664.2
248	1275.2	2093.6	1657.3	1666.3
249	1277.5	2095.6	1659.1	1668.5
250	1278.6	2099.1	1660.9	1670.5
251	1280.8	2102	1662.9	1672.6
252	1283	2103.4	1665.1	1674.9
253	1284.9	2106.2	1667.3	1676.9
254	1286.5	2109.3	1669.5	1679.1
255	1288.4	2111.6	1672	1681.3
256	1289.9	2112.4	1674.3	1683.4
257	1291.4	2114.8	1676.4	1685.7
258	1292.8	2116.5	1678.5	1687.7
259	1294.6	2119.3	1680.4	1689.8
260	1295.6	2121.3	1682.4	1691.9
261	1297.8	2124.4	1684.8	1694
262	1299.3	2125.7	1686.9	1696.1
263	1300.9	2127.3	1688.9	1698.1
264	1302.5	2129.4	1691.4	1700.3
265	1304.1	2132.7	1693.6	1702.6
266	1306	2135.7	1696.1	1704.7
267	1307.7	2136.3	1698.5	1706.8
268	1308.9	2138.9	1700.4	1708.9
269	1310.2	2140.8	1702.7	1711.1
270	1311.7	2144.4	1704.7	1713.3
271	1312.3	2147.2	1706.9	1715.4
272	1314.5	2149.7	1709.1	1717.5
273	1316	2152.8	1711.3	1719.7
274	1317.8	2154.5	1713.1	1721.7
275	1318.3	2157.2	1715.5	1723.8
276	1319.4	2159.9	1717.5	1725.9
277	1320.5	2162.9	1719.7	1727.9
278	1321.8	2165.6	1721.7	1729.9
279	1322.5	2169.8	1724	1732.2
280	1324.3	2171.8	1726.3	1734.4
281	1325.6	2174.7	1727.9	1736.4
282	1327.4	2177.4	1729.8	1738.6
283	1328.7	2181.3	1731.6	1740.7
284	1330	2184.6	1733.4	1742.8
285	1331.2	2188.8	1735.3	1744.9
286	1332.7	2190.8	1737.2	1746.9
287	1333.3	2193.8	1739.2	1749.2
288	1335.2	2197.3	1741.3	1751.4
289	1336.3	2200.5	1743.2	1753.5
290	1338	2203.5	1745.5	1755.7
291	1339.4	2206.5	1747.6	1757.7
292	1340.4	2210.3	1749.8	1759.8
293	1341.4	2214.3	1751.8	1762
294	1341.6	2216.2	1754.1	1764.1
295	1342	2219.4	1756	1766.2
296	1342.9	2224.6	1758.2	1768.4
297	1343.7	2227.3	1760.1	1770.4
298	1345.8	2231.3	1762.6	1772.5
299	1346.6	2234.5	1764.7	1774.5
300	1347.5	2237.3	1766.6	1776.5
301	1350.9	2239.3	1768	1778.5
302	1355.2	2242.3	1769.7	1780.7
303	1360	2243.3	1772.1	1783
304	1362.9	2244.8	1774.2	1785.1
305	1367.6	2245.8	1776.6	1787.3
306	1368.6	2248.1	1778.5	1789.1
307	1373.6	2249.9	1780.8	1791.3
308	1377.1	2252.1	1783.2	1793.7
309	1379.5	2252.3	1784.6	1795.7
310	1382.3	2252.6	1786.8	1797.7
311	1387.2	2255	1789	1799.8
312	1389.9	2257.2	1791.5	1802.1
313	1393.9	2258.3	1793.8	1804.3
314	1397.2	2260.5	1795.8	1806.5
315	1401	2262.3	1798.1	1808.7
316	1404.5	2264.9	1800	1810.9
317	1407.7	2267	1802.2	1813.1
318	1411.2	2268.4	1804.2	1815.2
319	1415.1	2270.2	1806.2	1817.5
320	1417.7	2272.1	1808.2	1819.7
321	1421.6	2274.3	1809.8	1822.1
322	1424.5	2275.7	1811.7	1824.1
323	1426.9	2277.2	1814.1	1826.2
324	1429.5	2278.3	1816	1828.3
325	1431.3	2280.4	1818.5	1830.4
326	1434.2	2282.5	1820.8	1832.8
327	1438.4	2284.3	1822.7	1835
328	1441.8	2284.2	1824.6	1837
329	1444.3	2285.2	1826.8	1839.3
330	1446.3	2287.3	1828.9	1841.4
331	1450	2289.6	1831.1	1843.7
332	1452	2292.1	1833.7	1845.9
333	1454.1	2294.3	1835.7	1848.1
334	1456	2296.7	1837.8	1850.2
335	1459	2298.3	1839.9	1852.3
336	1461.8	2299.9	1842.7	1854.7
337	1464.6	2302.7	1845.2	1856.9
338	1466.5	2304.3	1847.4	1859.2
339	1470.1	2305.7	1849.5	1861.3
340	1472	2307.5	1851.7	1863.5
341	1474.2	2310.2	1854.1	1865.9
342	1477.1	2312.4	1856.2	1868.1
343	1479.3	2314.6	1858.6	1870.3
344	1481.8	2317.4	1861.1	1872.5
345	1483.7	2319.3	1863.1	1874.7
346	1485.5	2322.7	1865.1	1877.1
347	1489.2	2324.6	1867.3	1879.3
348	1492.1	2327.8	1869.4	1881.3
349	1493.9	2329.9	1871.5	1883.5
350	1496.1	2332.2	1873.7	1885.7
351	1498.1	2334.6	1875.8	1887.8
352	1500.6	2336.2	1877.8	1889.9
353	1502.8	2337.5	1880.2	1892.1
354	1504.8	2339.7	1882.9	1894.4
355	1506.9	2340.5	1885.3	1896.5
356	1509	2342.5	1887.5	1898.7
357	1510.8	2344.7	1889.8	1900.9
358	1513.6	2348.3	1891.9	1903.2
359	1514.4	2350.5	1894.2	1905.4
360	1516.5	2351.4	1896.5	1907.5
361	1519.9	2354.3	1898.7	1909.7
362	1522.6	2356.3	1901	1912
363	1524.5	2357.8	1903.4	1914.1
364	1527.8	2361.7	1905.3	1916.4
365	1530.2	2363.9	1907.6	1918.5
366	1531.8	2366.2	1909.8	1920.6
367	1533	2368.9	1912.1	1922.7
368	1534.7	2371.5	1914.1	1925
369	1537	2374.8	1916.3	1927.1
370	1538.6	2377.1	1918.6	1929.2
371	1539.6	2380.3	1921.2	1931.5
372	1542	2383	1923.6	1933.7
373	1543.3	2384.7	1925.9	1935.8
374	1544.4	2387.8	1928.1	1938
375	1545.8	2389.9	1930.6	1940.3
376	1547.4	2393.6	1932.6	1942.6
377	1548.6	2395.8	1934.9	1944.7
378	1550.4	2398.3	1936.7	1946.8
379	1551.7	2400.7	1938.8	1949
380	1554.5	2404.5	1941.2	1951.2
381	1556.1	2407.8	1943.5	1953.4
382	1557.3	2410.6	1945.6	1955.6
383	1559.6	2413.4	1947.8	1957.6
384	1561.6	2417.7	1949.9	1959.8
385	1563.8	2420.7	1952	1962
386	1565.5	2424	1954.3	1964.3
387	1567.3	2426.5	1956.1	1966.6
388	1568.6	2429.2	1958.5	1968.8
389	1570.8	2431.5	1960.8	1971
390	1572.8	2434.7	1963.1	1973.3
391	1574	2436.8	1965.2	1975.5
392	1574.9	2439.5	1967.6	1977.8
393	1576.4	2441.2	1969.6	1979.8
394	1577	2445.5	1971.9	1981.9
395	1578.7	2448.6	1974	1984
396	1579.5	2451.5	1976.3	1986.2
397	1580.9	2452.7	1978	1988.3
398	1582.4	2455.6	1980	1990.4
399	1584	2459.1	1982.2	1992.7
400	1585.5	2460.2	1984.3	1994.8
401	1590.8	2463.8	1986.8	1997.2
402	1595.6	2465.3	1988.6	1999.4
403	1599.8	2467.4	1989.9	2001.6
404	1604.5	2468.2	1991.7	2003.7
405	1607.7	2468.5	1993.3	2005.8
406	1613.4	2469.9	1995.3	2007.8
407	1617.8	2473.4	1996.8	2010.1
408	1620.5	2475.5	1999.4	2012.4
409	1625.9	2476.8	2001.6	2014.5
410	1630.8	2478.8	2004.1	2016.8
411	1636.5	2480.8	2005.8	2019
412	1639.9	2482.7	2007.2	2021
413	1644.9	2485.4	2008.5	2023.1
414	1648.6	2486.9	2010.1	2025.3
415	1653.6	2487.2	2011.9	2027.5
416	1658	2489.4	2013.6	2029.6
417	1661.7	2491.3	2015.5	2031.8
418	1666	2493.8	2017.5	2034.1
419	1669.4	2495.4	2020.1	2036.3
420	1673.1	2496.1	2022.1	2038.4
421	1676.9	2497.4	2023.9	2040.8
422	1680.7	2499.8	2025.7	2042.8
423	1684	2501.8	2028	2045
424	1687	2503.4	2030	2047.2
425	1691.4	2505.3	2031.9	2049.4
426	1694.6	2507.6	2033.8	2051.6
427	1699.4	2509.9	2035.9	2053.9
428	1702.1	2512.5	2037.8	2056.1
429	1705.6	2514.4	2039.9	2058.4
430	1708.9	2515.5	2041.7	2060.6
431	1713.7	2517.1	2043.9	2062.8
432	1717.6	2517.6	2046.1	2064.9
433	1721.6	2519.3	2048	2067.2
434	1725.9	2521.3	2050.1	2069.5
435	1728.5	2522.9	2052.4	2071.9
436	1732	2524.9	2054.1	2074
437	1735.2	2526	2055.9	2076.2
438	1738.6	2527.8	2058	2078.3
439	1741.8	2529.8	2059.8	2080.5
440	1745.9	2531.2	2062.2	2082.8
441	1749.3	2532.5	2064.4	2085
442	1753	2533.7	2066.6	2087.2
443	1756.5	2535.6	2068.4	2089.3
444	1759.8	2538.1	2070.4	2091.5
445	1762.8	2540.5	2072.5	2093.8
446	1766.3	2541.8	2074.5	2096
447	1769.1	2544.2	2076.6	2098.1
448	1771.8	2546.5	2078.7	2100.2
449	1774.6	2547.9	2081	2102.6
450	1777.2	2550.2	2083	2104.9
451	1781	2551.4	2084.8	2107.1
452	1784.6	2553.3	2086.9	2109.3
453	1787.8	2555.3	2089.1	2111.4
454	1790.5	2556.3	2091.2	2113.5
455	1792.9	2558.7	2093.5	2115.8
456	1795.6	2560.3	2095.7	2117.9
457	1798.1	2562.1	2098.2	2120.2
458	1800.1	2564.8	2100.5	2122.3
459	1803.2	2567.9	2102.4	2124.6
460	1806.9	2570.3	2104.6	2126.8
461	1809.5	2571	2107	2129
462	1811.3	2573.6	2109.3	2131.2
463	1813.6	2576.4	2111.5	2133.5
464	1815.9	2577.7	2113.9	2135.7
465	1818.1	2578.7	2115.6	2137.9
466	1820.6	2580.6	2117.7	2140
467	1823.4	2582.3	2119.6	2142.2
468	1826.2	2584.7	2121.8	2144.4
469	1828.6	2587.3	2124.2	2146.7
470	1830.9	2589.2	2126.4	2148.9
471	1833.2	2591.1	2128.8	2151.1
472	1835.2	2591.9	2130.9	2153.2
473	1837.5	2593.7	2133.4	2155.4
474	1840.1	2594.9	2135.4	2157.6
475	1842.3	2597	2137.5	2159.8
476	1845.3	2600.4	2139.8	2162
477	1846.5	2603.1	2142.1	2164.2
478	1848.8	2605.7	2144.1	2166.4
479	1850.5	2608.6	2146.6	2168.5
480	1851.9	2610.1	2148.8	2170.6
481	1854.5	2613.1	2151.1	2172.8
482	1856.3	2615.4	2153.2	2175
483	1858	2616.2	2155.5	2177.2
484	1859.4	2617.7	2157.5	2179.3
485	1861.5	2619.8	2159.9	2181.6
486	1863.6	2622.4	2162.5	2183.8
487	1864.8	2624.9	2164.1	2185.8
488	1866.4	2628	2166.4	2188.1
489	1868.9	2630.6	2168.6	2190.4
490	1870.5	2632.8	2170.7	2192.5
491	1873.1	2635.6	2172.5	2194.7
492	1874.7	2637.5	2175	2196.8
493	1875.4	2640.6	2177.2	2198.9
494	1876.2	2642.3	2179.6	2200.9
495	1878.2	2645.7	2181.8	2203.2
496	1880.2	2648.1	2184.2	2205.4
497	1881.4	2650.4	2186	2207.7
498	1882.7	2653.5	2188.2	2209.8
499	1885	2656.1	2190.8	2212.2
500	1885.1	2659.2	2193	2214.3
501	1890.7	2661.4	2197.7	2218.5
502	1894.7	2664.8	2201.6	2222.4
503	1898.9	2668.2	2205.5	2226.6
504	1903.9	2672.6	2209.9	2231
505	1908.9	2675.9	2213.7	2235.1
506	1913.6	2680.7	2218.2	2239.2
507	1917.2	2685	2222.3	2243.5
508	1919.9	2689.3	2226.2	2247.7
509	1922.9	2692.9	2230.6	2251.9
510	1925.6	2697.4	2235.5	2256.1
511	1929.1	2701.2	2239.8	2260.3
512	1931.6	2705.3	2243.7	2264.4
513	1935.3	2708.7	2248.5	2268.7
514	1939.5	2713	2252.8	2272.8
515	1943.1	2717.4	2257.5	2277.1
516	1946.5	2722.2	2261.6	2281.3
517	1949.7	2726.3	2266	2285.6
518	1952.7	2731.4	2270.1	2289.9
519	1955.9	2735.8	2274.5	2294.2
520	1958.6	2739.4	2278.6	2298.4
521	1961.3	2744.6	2282.9	2302.7
522	1964	2749.5	2287.4	2306.8
523	1966.8	2755.1	2291.6	2310.9
524	1969.7	2761.2	2295.3	2315.2
525	1972	2765.2	2299.5	2319.3
526	1974.3	2769.2	2303.3	2323.6
527	1976.8	2772.1	2307.5	2327.8
528	1979.5	2776.7	2311.6	2332.2
529	1981.3	2782.7	2315.8	2336.5
530	1984.3	2788.3	2320.1	2340.6
531	1987.5	2794.8	2324.1	2344.7
532	1988.9	2799.8	2328.7	2349.1
533	1991.2	2803.9	2332.9	2353.3
534	1993.1	2809.7	2337	2357.4
535	1995.1	2817.3	2340.9	2361.7
536	1997.4	2822.8	2344.8	2366
537	1999.3	2828.6	2348.7	2370.3
538	2002	2832.8	2353.3	2374.6
539	2003.5	2838.1	2357.2	2378.7
540	2005.5	2843.2	2361.8	2383.1
541	2007.6	2849.7	2365.2	2387.3
542	2009.1	2856.4	2368.4	2391.4
543	2012.3	2862.1	2372.6	2395.7
544	2014.8	2869.3	2377.5	2400.1
545	2016.4	2874.3	2381.3	2404.2
546	2017.7	2881.8	2385.3	2408.4
547	2021.1	2888.3	2388.9	2412.7
548	2023.4	2895.1	2392.6	2416.9
549	2025.9	2901.1	2396.9	2421.3
550	2028.6	2909.1	2401.2	2425.6
551	2030.2	2915.8	2405.5	2430
552	2031.1	2923.1	2409.7	2434.1
553	2033.1	2932.5	2413.3	2438.2
554	2034.4	2939.5	2416.9	2442.3
555	2036.2	2946.1	2420.9	2446.8
556	2037.4	2953.2	2424.5	2450.9
557	2038	2962.4	2428	2455.2
558	2041.1	2967.3	2431.8	2459.3
559	2043.2	2973.9	2436.1	2463.7
560	2044.7	2983.2	2441.2	2468.1
561	2046	2992.9	2444.9	2472.4
562	2047.3	2997.8	2448.9	2476.4
563	2049.3	3005.7	2452.7	2480.4
564	2050.7	3015.8	2456.9	2484.7
565	2052.3	3021.8	2460.6	2488.8
566	2053.7	3030.3	2463.7	2493.1
567	2055.1	3038.6	2467.4	2497.1
568	2056.1	3048	2471.5	2501.4
569	2058.1	3056.2	2475.9	2505.6
570	2059.4	3065.1	2479.5	2509.8
571	2060.8	3072	2483.3	2513.9
572	2062	3081.7	2487.3	2518.2
573	2064	3089	2490.4	2522.3
574	2065.7	3095	2494	2526.4
575	2067.2	3104.2	2498.1	2530.4
576	2068.2	3111.6	2501.4	2534.6
577	2069.3	3119.8	2504.7	2538.7
578	2070.2	3127.2	2508.7	2542.8
579	2070.9	3136.1	2512.2	2547
580	2072.8	3145.1	2515.5	2551.1
581	2074.7	3155.6	2519.8	2555.3
582	2076.5	3163.4	2523.4	2559.4
583	2077.4	3170.5	2527.1	2563.5
584	2079.4	3179.2	2531.1	2567.5
585	2080.5	3187.8	2534.6	2571.7
586	2081.8	3197.3	2538.3	2576
587	2082.9	3209	2542.3	2580.1
588	2083.8	3218.1	2546.1	2584.1
589	2085	3227	2549.7	2588.3
590	2086.2	3234.3	2553.4	2592.4
591	2086.9	3242.6	2557.2	2596.5
592	2088.3	3252.7	2560.5	2600.6
593	2088.7	3262.4	2564.2	2604.8
594	2088.8	3272.8	2567.7	2609
595	2090.7	3283.1	2572.2	2613.3
596	2092.8	3295.2	2575.4	2617.5
597	2094.4	3303.7	2578.1	2621.6
598	2096.5	3313.2	2581.5	2625.8
599	2097.9	3323.4	2585.5	2629.9
600	2099.5	3333.8	2589.8	2634
601	2105.6	3336.1	2593.9	2638.2
602	2110.6	3339.6	2598.5	2642.6
603	2114.3	3340.4	2602.8	2646.9
604	2120.1	3342.8	2607.7	2651.3
605	2125.7	3346.6	2611.1	2655.5
606	2130.3	3349.6	2615.7	2659.7
607	2135.7	3352.1	2620.9	2664.1
608	2141.2	3355	2625	2668.3
609	2147.3	3358.5	2629.6	2672.7
610	2150.2	3361.9	2633.5	2676.9
611	2155.7	3365.3	2638	2681.3
612	2159.4	3367.8	2642.5	2686
613	2163.3	3370.7	2647	2690.3
614	2166.2	3374.1	2651.8	2694.6
615	2170.7	3377.7	2656	2698.9
616	2172.9	3380.7	2660.8	2703.3
617	2176.5	3385.1	2665.8	2707.7
618	2179.7	3387.5	2669.7	2711.8
619	2183.4	3392.5	2674.4	2716.2
620	2187.3	3395	2679	2720.6
621	2190.6	3397.9	2683.6	2724.8
622	2194.3	3401.3	2688.9	2729
623	2198.3	3406.9	2694.7	2733.6
624	2202.5	3412.1	2699.3	2738.1
625	2205.2	3416.6	2704	2742.5
626	2210.3	3419.8	2709.2	2746.9
627	2213	3422.9	2714	2751.3
628	2216.3	3424.9	2719.3	2755.5
629	2219.5	3429.9	2724.5	2760
630	2222.1	3434.2	2728.4	2764.1
631	2225.6	3437.5	2733.1	2768.3
632	2228.6	3441	2738.4	2772.8
633	2232.1	3446.6	2742.8	2777
634	2235.1	3449.8	2748.3	2781.6
635	2237.8	3453.6	2753.2	2786
636	2240.9	3455.9	2757.6	2790.4
637	2243.2	3459.3	2762.7	2794.8
638	2246.8	3463	2768.1	2799.3
639	2250.3	3467.3	2772.6	2803.7
640	2253.4	3471.4	2776.9	2807.8
641	2256.3	3474.7	2781.9	2812
642	2258.3	3476	2786.9	2816.4
643	2261.9	3479.2	2792.1	2820.6
644	2263.9	3482.3	2796.4	2824.8
645	2266.6	3487.6	2801.7	2829.2
646	2268.8	3491.4	2806.1	2833.8
647	2270.6	3495.1	2811.1	2838.2
648	2272.5	3498.8	2815.3	2842.5
649	2276.2	3502.9	2820.3	2846.6
650	2279.4	3508.2	2824.9	2851.1
651	2282.3	3513.4	2830.4	2855.5
652	2284.8	3517.4	2834.8	2859.8
653	2286	3520.2	2839.6	2864
654	2288.5	3523.6	2844.6	2868.2
655	2290.6	3529.9	2849.2	2872.4
656	2292.1	3534	2853.4	2876.8
657	2294.9	3539.7	2858.3	2881
658	2297.3	3545.8	2863.2	2885.5
659	2300.2	3552.7	2867.3	2889.9
660	2301.9	3557.7	2871.5	2894.2
661	2303.4	3563	2875.7	2898.7
662	2305.7	3568.6	2880.3	2903.1
663	2306.5	3574.6	2885	2907.4
664	2308.7	3580.3	2889.5	2911.7
665	2310.5	3585.3	2894.1	2915.9
666	2312.4	3589.4	2898.5	2920.2
667	2314.9	3595.9	2902.8	2924.5
668	2316.2	3600.8	2907.1	2928.8
669	2318.2	3608.3	2911	2933.1
670	2321	3613.7	2915.9	2937.5
671	2322.6	3621.8	2920	2941.7
672	2323.6	3629.2	2924.4	2945.9
673	2326.1	3634.4	2929	2950.2
674	2327.7	3639.4	2933.1	2954.5
675	2330	3645	2937.9	2958.9
676	2331.3	3653.8	2942.3	2963.2
677	2333.3	3660.6	2946.6	2967.3
678	2334.7	3666.1	2950.7	2971.5
679	2337.3	3671.5	2954.5	2976
680	2338.8	3679.8	2959	2980.3
681	2340.2	3686.4	2963.2	2984.5
682	2342.2	3692.1	2967.3	2988.8
683	2343.3	3699.9	2971.4	2993.1
684	2345.9	3706.6	2975.7	2997.3
685	2348.5	3713.6	2981.4	3001.9
686	2350	3718.9	2985.8	3006.2
687	2352.1	3726.1	2990.3	3010.3
688	2354.7	3735.4	2995	3014.8
689	2355.8	3740.4	2999.7	3019.1
690	2357.6	3748	3004.1	3023.3
691	2358.8	3756.4	3007.7	3027.6
692	2360.8	3762	3011.8	3031.9
693	2363.5	3768.5	3015.9	3036.2
694	2366.4	3773.9	3019.4	3040.6
695	2368.1	3781.1	3023.7	3044.8
696	2370.3	3788.6	3027.9	3048.8
697	2372.5	3796.7	3031.7	3053.1
698	2375.3	3804.8	3036	3057.6
699	2377.6	3812.8	3041	3062.1
700	2378.8	3820.1	3044.8	3066.3
701	2381.3	3822.1	3049	3070.5
702	2388	3825.4	3052.4	3074.5
703	2394	3828	3056.6	3078.8
704	2402.3	3830.7	3061.4	3083.1
705	2406.6	3833.5	3065.9	3087.1
706	2412.7	3835.6	3070.5	3091.4
707	2419.3	3837.9	3074.5	3095.5
708	2425.2	3842	3078.1	3099.6
709	2427.2	3843.1	3083	3103.9
710	2433.4	3846.3	3087.1	3108.3
711	2439.3	3850.5	3091	3112.6
712	2444	3853.2	3095.5	3116.8
713	2448.5	3855.3	3100	3121.2
714	2453.1	3857	3104.7	3125.4
715	2457.5	3860	3109.3	3129.7
716	2462.1	3862.5	3113.9	3134
717	2465	3865	3118.4	3138
718	2469.4	3867.5	3123.1	3142.3
719	2474.2	3869.4	3128.1	3146.6
720	2481.7	3871.6	3132.2	3150.8
721	2484.6	3874.7	3137.7	3155.4
722	2488.4	3877.5	3142.5	3159.6
723	2494.1	3881.1	3146.7	3163.9
724	2497.4	3883.2	3151.4	3168.2
725	2503.1	3885.5	3156.6	3172.7
726	2507.3	3888.5	3160.9	3176.8
727	2513.8	3890.3	3165.8	3181.2
728	2519.2	3893	3170.8	3185.5
729	2523.3	3894.8	3175.1	3189.7
730	2528	3896.9	3179.6	3194
731	2532.7	3898.8	3184.4	3198.3
732	2536.4	3902.9	3190	3202.7
733	2541.1	3907	3194.3	3206.9
734	2545.7	3911.1	3199.2	3211.2
735	2551	3914.8	3203.8	3215.5
736	2554.8	3917.6	3208.9	3220
737	2558.8	3921	3213.6	3224.3
738	2562	3924.3	3218.3	3228.7
739	2566.1	3926.3	3222.7	3233
740	2570.2	3928.9	3226.9	3237.3
741	2574.7	3931.4	3231.7	3241.6
742	2579.3	3933.9	3235.6	3245.9
743	2584	3935.8	3241.1	3250.2
744	2586.6	3941.3	3245.8	3254.6
745	2591.3	3944.2	3250.7	3259
746	2594.5	3946.3	3255.6	3263.4
747	2596.9	3951.1	3259.9	3267.7
748	2600.4	3954.5	3264.5	3272
749	2602.7	3957.3	3269.6	3276.2
750	2605.4	3959.5	3275.1	3280.4
751	2607.3	3961.8	3280.5	3284.9
752	2611	3966	3284.3	3289.1
753	2612.7	3969.7	3289.1	3293.6
754	2614.9	3973.5	3293.6	3297.7
755	2618.9	3976.7	3298.5	3302.1
756	2623.5	3980.4	3303.6	3306.5
757	2625.9	3983.9	3307.5	3310.5
758	2628.1	3988.6	3312.4	3315.1
759	2633.8	3990.8	3317.1	3319.6
760	2638.3	3996.2	3321.9	3324.1
761	2640.8	4000.2	3325.9	3328.5
762	2645.7	4004.1	3331.2	3332.7
763	2648.7	4009.2	3336.5	3337.3
764	2652.5	4012.1	3341	3341.3
765	2655.1	4016.6	3345.3	3345.7
766	2656.5	4020	3349.9	3350
767	2660.4	4024.7	3353.6	3354.3
768	2662.4	4029.1	3358.9	3358.7
769	2666.2	4033.5	3364.7	3363.1
770	2669.3	4039.9	3369.1	3367.4
771	2672.7	4043.4	3372.9	3371.6
772	2675.2	4048.6	3376.9	3375.9
773	2677.4	4053.9	3380.4	3380.3
774	2681.6	4058.4	3385	3384.3
775	2683.8	4063.3	3390.3	3388.8
776	2685.8	4069.3	3394.9	3393.1
777	2687.3	4073.3	3399.6	3397.4
778	2689.4	4077.5	3403.7	3401.5
779	2692.7	4081.3	3407.9	3405.7
780	2695.1	4086.9	3412.1	3410.1
781	2697.4	4092.3	3415.6	3414.1
782	2700.2	4097	3420.4	3418.6
783	2703.4	4102.8	3425.6	3422.7
784	2706.4	4107.7	3430.1	3427
785	2709.2	4113.1	3434.1	3431.1
786	2711.6	4118.8	3438.2	3435.4
787	2714.7	4126.9	3441.9	3439.6
788	2717.2	4131.9	3446.9	3443.9
789	2718.7	4134.8	3451.1	3447.9
790	2720.1	4138.8	3455.4	3451.9
791	2723.3	4144.9	3459.8	3456.2
792	2725.5	4153.5	3464.5	3460.6
793	2728.1	4160.6	3469.3	3465
794	2732.5	4165.8	3472.8	3469.2
795	2734.8	4171.7	3477.4	3473.5
796	2736.7	4177.5	3481.6	3477.7
797	2738.6	4183.3	3485.9	3481.8
798	2740	4188.4	3489.7	3486
799	2741.3	4192.8	3493.7	3490.1
800	2742.7	4200.8	3497.8	3494.3
801	2749.7	4201.9	3502	3498.6
802	2757.5	4204.2	3506.8	3503.2
803	2766.5	4206.4	3511.3	3507.7
804	2773.3	4208.1	3515.6	3511.9
805	2780.2	4210.6	3519.9	3516.1
806	2786.5	4211.5	3524.6	3520.4
807	2796	4213.5	3528.5	3525.1
808	2801.9	4214.4	3532.5	3529.8
809	2810.2	4216.6	3537.4	3534.2
810	2816.7	4219.3	3542	3538.6
811	2823.9	4221	3546.7	3542.8
812	2829.5	4223.5	3551	3547.4
813	2836.2	4225.2	3556.1	3551.9
814	2845.1	4226.7	3560.5	3556.4
815	2852.3	4229.1	3564.3	3560.9
816	2859.7	4230.6	3569.1	3565.4
817	2866.3	4232.2	3573	3569.8
818	2872.4	4233.5	3578.1	3574.3
819	2878.5	4235	3582.1	3578.7
820	2884.3	4238.1	3586.7	3583.1
821	2892.5	4240.7	3592.2	3587.7
822	2896.9	4242	3596.5	3591.9
823	2902.9	4245.3	3600.9	3596.3
824	2908.6	4247.7	3605.2	3600.8
825	2914.6	4249	3609.2	3605.3
826	2920.2	4250.8	3613.3	3609.9
827	2924.9	4252.4	3617.9	3614.4
828	2930	4254.2	3621.6	3619
829	2936.3	4256.2	3626.8	3623.5
830	2941.7	4258.4	3630.6	3627.6
831	2946.3	4261.5	3634.6	3632.1
832	2954	4264.5	3639.2	3636.6
833	2959.7	4267.3	3644.1	3641
834	2965.9	4270.4	3649.5	3645.7
835	2969	4273.1	3654.5	3649.9
836	2972.2	4276	3659.8	3654.2
837	2976.2	4277.4	3664.6	3658.9
838	2980.3	4279.5	3668.9	3663.4
839	2985.6	4281.8	3673.4	3667.8
840	2992	4283.9	3678.4	3672.2
841	2996	4285.7	3683	3677
842	2999.8	4289.3	3687.9	3681.7
843	3006.5	4291.4	3692.9	3686
844	3010.8	4294.1	3697.3	3690.5
845	3014.2	4295.8	3702.6	3694.9
846	3016.6	4298.5	3707.3	3699.2
847	3020.7	4299.9	3711.3	3703.5
848	3025.1	4302.5	3716	3708.1
849	3029.7	4306.3	3720.4	3712.5
850	3034.6	4309.2	3725.5	3717.1
851	3039.7	4312	3730.2	3721.7
852	3043.8	4316.4	3734.7	3726.2
853	3048.4	4320.8	3739.3	3730.7
854	3051.4	4323.6	3744	3735.3
855	3057	4324	3748.9	3739.9
856	3061.1	4327.7	3753.8	3744.1
857	3063.9	4330.2	3758.5	3748.4
858	3068.5	4333.3	3762.9	3752.7
859	3070.5	4337.5	3767.2	3757.2
860	3075.8	4339.8	3772.3	3761.7
861	3080.4	4344.2	3778.1	3766.3
862	3084	4346.9	3783.4	3770.7
863	3089.2	4351	3789	3775.4
864	3092.6	4353.4	3792.8	3779.8
865	3095.2	4356.2	3797.7	3784.4
866	3098.5	4360.5	3802.3	3788.8
867	3101.7	4362.9	3807.3	3793.2
868	3106.4	4365.7	3812.7	3797.9
869	3109.8	4368.3	3817.7	3802.4
870	3113.5	4372.4	3822.3	3806.8
871	3115.2	4376.3	3826.9	3811.3
872	3119.1	4379.8	3831.1	3815.7
873	3121.8	4384.9	3835.9	3820.3
874	3124.3	4387.8	3841.2	3824.7
875	3127.4	4391	3845.4	3829
876	3129	4394.2	3850.5	3833.6
877	3131.2	4399.5	3855.1	3838.2
878	3135.4	4403.1	3859.9	3842.6
879	3139	4406.9	3864.8	3847
880	3141.6	4409.9	3869.8	3851.7
881	3145.1	4414.4	3874.6	3856.1
882	3148.2	4418.5	3878.8	3860.6
883	3150.4	4423.4	3884	3865.1
884	3152.1	4427.8	3888.7	3869.4
885	3154.8	4429.9	3893.6	3873.8
886	3158.1	4435.6	3898.9	3878.2
887	3159.4	4439.9	3903.1	3882.4
888	3162	4444.5	3907.9	3886.9
889	3166.4	4449	3913	3891.5
890	3168.1	4453.9	3917.9	3896
891	3169.9	4457.4	3922	3900.2
892	3173.3	4462.1	3926.6	3904.8
893	3177.5	4467.4	3931	3909
894	3180.4	4473	3935.5	3913.6
895	3184	4477.1	3939.9	3918
896	3186.1	4481.2	3943.9	3922.4
897	3189.2	4487.9	3947.3	3926.6
898	3191.1	4492.5	3952.2	3931.1
899	3195	4498.6	3956.8	3935.3
900	3198.2	4503.5	3961.2	3939.5
901	3205	4504.6	3964.6	3943.8
902	3213.9	4505.7	3969.5	3947.8
903	3221.4	4505.3	3973.8	3951.7
904	3231.5	4508.4	3976.8	3955.8
905	3241.1	4508.5	3981	3960.3
906	3247.3	4510.4	3983.8	3964.2
907	3258.7	4512.6	3988	3968.2
908	3269.8	4512.8	3991.4	3972.3
909	3279.2	4514	3994.9	3976.3
910	3287.8	4516	3998.7	3980.4
911	3296.9	4516.6	4002.8	3984.6
912	3307.2	4518.2	4006.7	3988.7
913	3316.1	4519.1	4009.6	3992.8
914	3325.1	4521.8	4013.8	3996.8
915	3333.4	4522.4	4017.4	4000.9
916	3342.8	4524.5	4021.3	4005.1
917	3352.7	4525.6	4024.8	4009.2
918	3358.7	4525.1	4029	4013.1
919	3367.3	4527.5	4033.2	4016.9
920	3377.4	4528.2	4037.3	4021.3
921	3383.8	4530.7	4041	4025.4
922	3392.5	4531.9	4045.5	4029.8
923	3401.5	4533.1	4049.4	4033.8
924	3407.2	4535.2	4053.1	4037.7
925	3417.9	4537.1	4057.6	4041.8
926	3426	4539.1	4062	4046
927	3435	4540.4	4065.7	4050.1
928	3444.1	4542.6	4069.7	4054.2
929	3451.3	4544.4	4073.6	4058.4
930	3460.2	4545.8	4077.7	4062.5
931	3468.2	4547.1	4081.5	4066.8
932	3476.3	4549.2	4085.5	4071.1
933	3484.4	4550.8	4089.6	4075.1
934	3491.2	4552.7	4094.1	4079.4
935	3500.8	4554.6	4098.3	4083.7
936	3507.1	4555.9	4102.5	4087.9
937	3514.5	4557.8	4106.6	4092
938	3523.3	4559.2	4110.7	4096.2
939	3531.4	4561.2	4114.9	4100.2
940	3537.2	4564.1	4118.8	4104.5
941	3545.2	4566.5	4122.8	4108.7
942	3553.9	4568.2	4127.7	4113.3
943	3559.6	4569.5	4131.9	4117.4
944	3565.8	4572.2	4135.9	4121.5
945	3573.7	4574	4139.7	4125.7
946	3581.8	4576.3	4143.6	4129.9
947	3590.3	4577.9	4148	4134.1
948	3597.2	4580.5	4152.1	4138.2
949	3605.1	4582.5	4156.5	4142.6
950	3611.3	4584.2	4160.9	4146.8
951	3618.9	4586.4	4164.9	4150.9
952	3625.5	4588	4169	4155.1
953	3631	4591	4173.3	4159.5
954	3639.5	4593.1	4176.9	4163.6
955	3645.3	4595.5	4181	4167.8
956	3652.8	4598.1	4185.1	4172
957	3659.3	4600.2	4188.8	4176.3
958	3667.5	4602.1	4193.2	4180.7
959	3673.7	4604.8	4196.9	4184.7
960	3680.4	4606.8	4201.8	4189.2
961	3682.4	4609.7	4205.8	4193.2
962	3687.8	4613.2	4210.1	4197.7
963	3693.4	4615.3	4213.9	4201.8
964	3699.6	4617.6	4217.6	4205.9
965	3704.8	4620	4221.2	4210
966	3709	4622.4	4225.5	4214.3
967	3713.7	4624.3	4229.5	4218.2
968	3720	4627.7	4234	4222.4
969	3724.1	4630.1	4239.1	4226.9
970	3730.1	4633.8	4243.7	4231.2
971	3735.1	4637.9	4248.5	4235.5
972	3739.1	4641.1	4252.7	4239.6
973	3743.1	4642.9	4256.9	4243.9
974	3750.3	4645.7	4260.9	4248.1
975	3754.6	4648.8	4265.7	4252.4
976	3758.1	4651.7	4269.5	4256.5
977	3761.1	4655.1	4273.7	4260.6
978	3767.7	4659	4278.6	4265.1
979	3770.6	4660.5	4283	4269.2
980	3774.9	4664.1	4287.7	4273.5
981	3780.3	4668	4292.7	4277.9
982	3785.7	4672.1	4296.9	4282.1
983	3790	4676.7	4301.7	4286.3
984	3794.7	4680.4	4306.5	4290.5
985	3797.4	4684	4311.1	4294.7
986	3802.6	4688.3	4315.3	4298.8
987	3805.6	4692.4	4319.7	4303.1
988	3809.8	4696.5	4323.9	4307.3
989	3813	4700.5	4328.7	4311.5
990	3816.8	4705.8	4333.2	4315.5
991	3821.8	4709.5	4337.8	4319.7
992	3824.9	4712.5	4342.1	4323.8
993	3830	4716	4347.2	4328.1
994	3834.2	4721.6	4351.7	4332.3
995	3837.7	4726.5	4355.7	4336.7
996	3839.7	4730.2	4360.6	4341
997	3843.3	4734.2	4364.6	4345
998	3846.4	4738.5	4368.6	4349.2
999	3849.1	4743.1	4372.8	4353.6
1000	3851.1	4747	4376.7	4357.6
1001	3855.4	4749.2	4379.1	4360
1002	3858.3	4751.1	4381.5	4362.3
1003	3861.8	4753.8	4383.8	4364.4
1004	3863.5	4756	4386.2	4366.8
1005	3865.9	4757.4	4388.5	4369.2
1006	3866.8	4760.1	4391	4371.6
1007	3870.4	4761.8	4393.2	4373.8
1008	3874.4	4764.7	4395.2	4376.1
1009	3875.4	4767.4	4397.7	4378.4
1010	3878.1	4769.2	4400	4380.8
1011	3881.2	4771.2	4401.9	4383.1
1012	3883.4	4772.5	4404.4	4385.5
1013	3886.6	4774.9	4406.5	4387.6
1014	3888.7	4775.7	4408.8	4389.9
1015	3890.7	4777.7	4410.8	4392.2
1016	3892.2	4779.7	4413.3	4394.6
1017	3897.7	4781.8	4415.2	4397
1018	3899.8	4783.9	4417.3	4399.2
1019	3902.2	4786.1	4419.5	4401.6
1020	3904.2	4788.6	4421.3	4404.1
1021	3905.6	4790.4	4423.6	4406.3
1022	3907.8	4793.1	4426.1	4408.7
1023	3911	4795.5	4428.4	4410.8
1024	3911.6	4797.6	4430.3	4413.1
1025	3914.6	4800.4	4432.7	4415.5
1026	3918.2	4803.5	4434.7	4417.7
1027	3921.4	4806.3	4437	4419.9
1028	3922.5	4808.4	4439.5	4422.1
1029	3924.8	4810.8	4442.2	4424.5
1030	3928	4813.2	4444.7	4426.8
1031	3929.5	4815.1	4447.3	4429.2
1032	3932.6	4817.3	4449.7	4431.5
1033	3935.3	4819.1	4452.1	4433.9
1034	3937.5	4821.2	4454	4436.2
1035	3939.1	4822.8	4455.7	4438.4
1036	3940.8	4825.6	4458.1	4440.8
1037	3943.8	4828	4460.4	4443.1
1038	3944.9	4830.8	4462.6	4445.3
1039	3947.3	4833.5	4464.2	4447.6
1040	3947.4	4835.4	4466.6	4449.8
1041	3951.1	4837.1	4468.9	4452.1
1042	3954.1	4839	4471.2	4454.5
1043	3955.9	4841.6	4473.4	4456.8
1044	3958	4844.5	4475.3	4459.1
1045	3961.2	4847.8	4477.6	4461.5
1046	3962.8	4850.2	4479.8	4463.6
1047	3965.4	4852.8	4482.3	4466
1048	3968.2	4856.6	4484.6	4468.4
1049	3969.1	4859.9	4486.3	4470.7
1050	3971.8	4861.7	4488.7	4473.1
1051	3972.8	4864.6	4491	4475.4
1052	3976.5	4867.4	4493.4	4477.8
1053	3977.2	4870.4	4495.8	4480.1
1054	3979.7	4874.4	4497.9	4482.5
1055	3981.5	4877.3	4500	4484.8
1056	3985.2	4881.2	4502.1	4487.1
1057	3986.1	4885.4	4504.1	4489.5
1058	3989.5	4888.9	4506.1	4491.7
1059	3990	4892.4	4508.9	4494
1060	3992.3	4894.9	4511.3	4496.4
1061	3995.1	4898	4513.4	4498.7
1062	3998	4901	4515.5	4501
1063	3999.9	4905.6	4517.6	4503.4
1064	4001.4	4909.3	4519.7	4505.7
1065	4002.8	4911.5	4521.9	4508
1066	4003.7	4914.6	4524.2	4510.5
1067	4005.5	4918	4526.2	4512.9
1068	4008.6	4921.8	4528.3	4515.2
1069	4009.6	4925.5	4530.6	4517.4
1070	4011.3	4930	4532.6	4519.7
1071	4012.3	4934.1	4535.2	4522.2
1072	4013.8	4936.8	4537.5	4524.4
1073	4017	4941.5	4539.7	4526.9
1074	4018.4	4945.2	4542.1	4529.2
1075	4021.6	4949.5	4544.1	4531.7
1076	4023.1	4951.6	4545.8	4534
1077	4024.5	4955.8	4548	4536.2
1078	4026.6	4959.4	4550.3	4538.6
1079	4028.6	4963.4	4552.6	4540.9
1080	4031.5	4967.3	4554.5	4543
1081	4032.6	4972.6	4556.8	4545.4
1082	4033.2	4976.9	4558.8	4547.7
1083	4034.5	4981.4	4560.6	4549.9
1084	4036.5	4985	4563.1	4552.4
1085	4038.4	4987.9	4565.2	4554.7
1086	4040.6	4991.3	4567	4557.1
1087	4042.1	4996	4569.3	4559.5
1088	4043.4	4999.1	4571.2	4561.7
1089	4043.9	5003	4573.1	4564.2
1090	4046.1	5009	4575.2	4566.5
1091	4047.3	5013.1	4577.5	4568.8
1092	4049.7	5017.4	4579.4	4571.3
1093	4050.3	5022	4581.4	4573.5
1094	4050.7	5026.1	4583.7	4575.9
1095	4053	5031.3	4585.4	4578.3
1096	4054.2	5035	4587.4	4580.5
1097	4056.3	5039.5	4589.4	4582.9
1098	4057.4	5044	4590.8	4585.1
1099	4058.9	5047.7	4592	4587.2
1100	4059	5052.5	4594.1	4589.6
1101	4063.7	5052.9	4596.4	4591.9
1102	4067	5054.5	4599	4594.3
1103	4069.1	5056.5	4601.5	4596.9
1104	4073.5	5057.8	4603.8	4599
1105	4076.1	5059.1	4606.1	4601.3
1106	4079.8	5060.8	4608	4603.6
1107	4083.4	5062.1	4610.2	4605.8
1108	4085.9	5064.2	4612.8	4608.2
1109	4087.5	5065.9	4615.2	4610.4
1110	4091.5	5067	4617.5	4612.6
1111	4094.9	5068.3	4620	4614.9
1112	4100.5	5069.6	4622	4617.3
1113	4105.3	5070.7	4624.5	4619.8
1114	4108.4	5072	4627.1	4622.2
1115	4109.2	5073.4	4629.6	4624.5
1116	4111.9	5074.9	4631.8	4627
1117	4114.2	5076.1	4634	4629.3
1118	4118.4	5078.2	4636.3	4631.7
1119	4122.4	5079.4	4639	4634.2
1120	4125.8	5080.5	4641.1	4636.5
1121	4127.9	5082	4643.6	4638.9
1122	4130.7	5085	4646.3	4641.3
1123	4136.7	5086.4	4648.5	4643.6
1124	4140.2	5088.6	4650.9	4646
1125	4142.8	5089.8	4653.3	4648.3
1126	4145	5091	4656.1	4650.6
1127	4147.1	5093.4	4658.6	4653
1128	4150	5095.3	4660.8	4655.4
1129	4152.8	5098	4664.1	4658
1130	4156.6	5100.4	4666.4	4660.5
1131	4158.9	5101.4	4668.7	4662.9
1132	4160.6	5102.7	4670.7	4665.2
1133	4162.6	5103.8	4673.4	4667.6
1134	4165.5	5106.3	4675.8	4670
1135	4171	5109	4678.4	4672.4
1136	4172.2	5111.8	4680.9	4674.7
1137	4175.7	5114.9	4683.5	4677
1138	4177.6	5117.4	4685.6	4679.4
1139	4180.1	5119.2	4688.3	4681.9
1140	4183.6	5121	4690.7	4684.4
1141	4185.5	5122.3	4693.1	4686.8
1142	4187.5	5124.1	4695.5	4689
1143	4189.1	5127.4	4698	4691.5
1144	4190.8	5129.6	4700.2	4694
1145	4193.6	5131	4702.5	4696.3
1146	4195.3	5133.2	4705	4698.6
1147	4197.7	5135.9	4707.4	4701
1148	4199.4	5138.7	4710.1	4703.4
1149	4201.6	5140.7	4712.5	4705.8
1150	4203.8	5143.3	4715.1	4708.1
1151	4206.2	5145.3	4717.2	4710.5
1152	4208.8	5147.5	4720.2	4713.2
1153	4211	5150.6	4722.9	4715.6
1154	4213	5152.6	4725.1	4718
1155	4216.9	5154.6	4727.4	4720.4
1156	4220.3	5156.4	4730	4722.6
1157	4223.3	5158.4	4732	4725.1
1158	4225.4	5161.2	4734.5	4727.4
1159	4227.5	5165	4736.5	4729.8
1160	4228.7	5167.1	4739	4732.1
1161	4231.8	5168.6	4741.5	4734.6
1162	4235.7	5170.8	4743.8	4737
1163	4236.7	5173.4	4746.2	4739.4
1164	4238.5	5176.8	4748.5	4741.9
1165	4240.9	5179.2	4750.3	4744.2
1166	4242.9	5182.3	4752.5	4746.8
1167	4244.8	5184.3	4754.5	4749.2
1168	4248.5	5187	4756.7	4751.4
1169	4251.4	5190.6	4758.8	4753.6
1170	4253.7	5194.2	4760.9	4755.9
1171	4256.2	5197	4763.3	4758.3
1172	4257.5	5200.3	4765.2	4760.6
1173	4259.1	5203.8	4767.6	4763
1174	4260.4	5208.4	4769.9	4765.3
1175	4262	5211.8	4772.3	4767.7
1176	4264.7	5214.3	4774.6	4770.1
1177	4266.7	5217.6	4776.6	4772.6
1178	4269.5	5221.5	4778	4774.9
1179	4271.5	5224.5	4780.5	4777.3
1180	4273.6	5225.8	4783.1	4779.6
1181	4275.5	5228.3	4785.4	4782
1182	4276.9	5231	4787.2	4784.4
1183	4278.8	5234.2	4789.8	4786.7
1184	4280.7	5237.1	4791.7	4789
1185	4282.3	5240.8	4793.7	4791.4
1186	4284	5244.4	4796.5	4793.9
1187	4285.8	5248.5	4798.8	4796.4
1188	4287.1	5253.1	4801.1	4798.8
1189	4288.1	5257.1	4803.6	4801.3
1190	4288.9	5260.4	4805.8	4803.6
1191	4290.2	5264.1	4808	4806
1192	4291.7	5268.5	4810	4808.3
1193	4294.2	5272.7	4812.3	4810.6
1194	4295.3	5277.8	4814.4	4812.9
1195	4296.7	5280.6	4816.5	4815.2
1196	4297.1	5283.5	4818.5	4817.3
1197	4298.4	5287.8	4821.3	4819.7
1198	4299.9	5291.9	4823.4	4822.2
1199	4302.4	5295.5	4825.7	4824.6
1200	4303.3	5300.3	4827.9	4827
1201	4308.3	5302	4830.4	4829.5
1202	4311.8	5304.1	4833.2	4831.8
1203	4315	5305.9	4834.9	4834.1
1204	4319.6	5307.2	4837.7	4836.3
1205	4323.8	5308.5	4839.8	4838.6
1206	4329.7	5310.2	4842.5	4841
1207	4333	5311.7	4845	4843.3
1208	4336.6	5313	4847.5	4845.8
1209	4339.4	5314.1	4849.9	4848.2
1210	4342.7	5316.3	4851.7	4850.4
1211	4345.8	5317.3	4854	4852.8
1212	4348.5	5319.1	4856.6	4855
1213	4351.7	5320.4	4859.1	4857.5
1214	4354.8	5321.5	4861.3	4859.8
1215	4357.6	5322.2	4864.1	4862.1
1216	4361.3	5324.1	4866.3	4864.5
1217	4365.4	5324.7	4869.2	4866.9
1218	4369.4	5325.7	4871.9	4869.3
1219	4373.2	5326.7	4874.4	4871.8
1220	4375.2	5328.2	4877.1	4874.2
1221	4378.8	5329.1	4879.5	4876.4
1222	4381.8	5330.8	4881.8	4878.7
1223	4384.7	5332	4884.6	4881.2
1224	4387.3	5334.5	4887.4	4883.7
1225	4389.8	5336.1	4889.5	4886
1226	4391.5	5337.5	4891.4	4888.1
1227	4393.9	5339.2	4893.7	4890.6
1228	4396.3	5340.5	4896.2	4893
1229	4399.6	5341.9	4899.1	4895.3
1230	4402.3	5343.5	4902	4897.6
1231	4404.2	5345.5	4904.3	4899.9
1232	4406.1	5347.3	4906.5	4902.1
1233	4407.3	5349.5	4908.9	4904.5
1234	4410.1	5350.5	4910.9	4906.7
1235	4412.2	5352	4913.6	4909
1236	4414.6	5352.6	4916.4	4911.5
1237	4417.2	5354.4	4919.3	4914
1238	4418.6	5356.5	4921.6	4916.3
1239	4419.9	5358.3	4924.2	4918.8
1240	4422.7	5359.5	4927	4921.1
1241	4425.8	5361.8	4929.3	4923.4
1242	4428.4	5363.6	4931.3	4925.6
1243	4430	5364.3	4934.3	4927.9
1244	4431.7	5366.1	4936.5	4930.3
1245	4433.8	5366.4	4939.3	4932.6
1246	4436.5	5368	4941.3	4934.9
1247	4440.2	5369.7	4943.7	4937.3
1248	4442.1	5371.9	4946.2	4939.6
1249	4445.6	5373.9	4948.6	4941.8
1250	4448.3	5377.3	4951.3	4944.3
1251	4449.8	5378.7	4953.5	4946.5
1252	4451.6	5381.7	4956	4948.9
1253	4452.6	5383.1	4959	4951.3
1254	4454.6	5385.8	4961.4	4953.8
1255	4458.3	5387.3	4964	4956.1
1256	4460.9	5390.1	4966.2	4958.3
1257	4463.4	5391.2	4968.9	4960.8
1258	4465.5	5393.1	4971.5	4963.1
1259	4467.4	5394.5	4974.1	4965.4
1260	4469.7	5397.3	4976.7	4967.8
1261	4472.2	5399.5	4979	4970.3
1262	4474.1	5401.7	4981.7	4972.5
1263	4476.1	5403.8	4983.8	4974.9
1264	4478.1	5406.6	4985.9	4977.2
1265	4480.8	5408.7	4988.3	4979.6
1266	4483.8	5410.8	4990.4	4982
1267	4485.7	5413	4993.3	4984.5
1268	4487.7	5412.7	4995.5	4986.8
1269	4489.4	5415	4998.1	4989
1270	4491.7	5417.1	5000.6	4991.2
1271	4492.9	5418.8	5003	4993.4
1272	4496	5421.9	5005.8	4995.8
1273	4498.3	5424.8	5007.5	4998
1274	4500.3	5427.3	5009.5	5000.2
1275	4502.3	5429.8	5012.1	5002.5
1276	4505	5431.9	5014.5	5004.9
1277	4506.4	5433.2	5017.1	5007.4
1278	4508.8	5436.6	5019.4	5009.8
1279	4511.8	5439.3	5021.7	5011.9
1280	4511.5	5441.9	5024.4	5014.1
1281	4513.7	5442.4	5027.1	5016.6
1282	4516.3	5446.8	5029.2	5019
1283	4518.6	5448.5	5031.8	5021.2
1284	4520.7	5451.7	5034.1	5023.5
1285	4522.9	5453.6	5036.4	5025.7
1286	4525.1	5456.1	5038.6	5028.1
1287	4526.2	5460.2	5040.5	5030.4
1288	4529.2	5462.7	5042.5	5032.7
1289	4530.2	5464.5	5045.2	5035.2
1290	4532.6	5468.7	5047	5037.7
1291	4534.4	5471.4	5049.4	5039.8
1292	4537.4	5475.9	5050.5	5041.9
1293	4538.9	5477.7	5053.6	5044.2
1294	4540.5	5481.1	5056	5046.6
1295	4543.4	5483.1	5058	5048.6
1296	4546	5487.3	5060.7	5051.2
1297	4544.7	5490	5063	5053.5
1298	4545.5	5493.1	5065.5	5055.8
1299	4547.3	5496.5	5068	5058.1
1300	4547.3	5499.1	5070.5	5060.6
1301	4551.1	5500.6	5072.9	5062.9
1302	4555.5	5501.4	5075.5	5065.3
1303	4558.5	5503.5	5077.5	5067.6
1304	4561.5	5504.6	5080	5069.8
1305	4566.1	5506	5082.6	5072.3
1306	4568.3	5507.6	5084.8	5074.5
1307	4571.4	5508.7	5087.4	5076.9
1308	4575.1	5509.9	5089.7	5079.2
1309	4578.5	5510.7	5092.3	5081.5
1310	4581.6	5510.9	5094.7	5083.9
1311	4585.7	5512.2	5097.5	5086.4
1312	4589.1	5513.2	5099.8	5088.7
1313	4592.2	5514.7	5102.2	5090.9
1314	4598.1	5515.5	5104.4	5093.2
1315	4601.8	5516.9	5106.8	5095.6
1316	4605	5517.5	5109.2	5098
1317	4608	5518.3	5111.6	5100.3
1318	4611.7	5518.5	5114	5102.7
1319	4614.1	5519.4	5116.2	5104.9
1320	4616.3	5520.2	5118.5	5107.2
1321	4620.4	5520.9	5120.4	5109.5
1322	4624.4	5521.9	5122.8	5111.6
1323	4627.1	5523	5125.5	5114
1324	4630.8	5523.9	5127.8	5116.3
1325	4633.5	5525.5	5130.3	5118.7
1326	4635.8	5526.7	5133	5121.1
1327	4637.6	5528.6	5135.6	5123.3
1328	4640.5	5529.8	5138	5125.8
1329	4643.3	5530.9	5140.8	5128.1
1330	4646.1	5531.5	5143.4	5130.4
1331	4649.2	5533	5145.5	5132.7
1332	4650.8	5534.1	5147.6	5134.8
1333	4653.3	5535.2	5150	5137.2
1334	4657.6	5536	5152.5	5139.6
1335	4660.4	5537	5155	5141.8
1336	4662.7	5539.2	5157	5144.2
1337	4666.9	5539.9	5159.4	5146.6
1338	4670.1	5541	5162.4	5149.1
1339	4672.2	5542.2	5164.7	5151.4
1340	4675.5	5543.2	5167.4	5154
1341	4677.5	5545.8	5169.7	5156.3
1342	4679.5	5547	5172.3	5158.7
1343	4681.5	5548.8	5174.6	5161
1344	4683.5	5549.9	5177	5163.2
1345	4686.5	5551.5	5179.5	5165.6
1346	4689.2	5552.9	5182.1	5167.9
1347	4691	5554.1	5184.6	5170.2
1348	4692.7	5556.5	5186.9	5172.5
1349	4695.2	5558.2	5189.3	5174.8
1350	4697	5560	5191.6	5177
1351	4699.6	5561.6	5194	5179.4
1352	4702	5563.6	5196.2	5181.7
1353	4704.6	5566.1	5198.8	5184.2
1354	4707.5	5568	5201.1	5186.6
1355	4708.6	5570.7	5203.4	5188.9
1356	4711.8	5572.2	5205.7	5191.2
1357	4714.3	5574	5208.6	5193.5
1358	4715.9	5576.1	5210.8	5195.9
1359	4719.2	5577.1	5213.4	5198.2
1360	4720.4	5578.7	5216	5200.7
1361	4723.4	5580	5218.5	5203.1
1362	4727	5581.9	5220.9	5205.4
1363	4728.5	5583.2	5223	5207.6
1364	4730.3	5584.8	5225.4	5210
1365	4732.6	5586	5227.8	5212.3
1366	4735.7	5587.8	5230.2	5214.6
1367	4738.4	5590.7	5233	5217
1368	4740.5	5592.8	5235.1	5219.3
1369	4740.9	5593.9	5237.7	5221.6
1370	4741.8	5595.8	5240.3	5224
1371	4744.4	5597.6	5243.2	5226.4
1372	4746.4	5599.7	5246	5228.7
1373	4747.2	5601.5	5248.6	5231.1
1374	4749.1	5603.6	5251.2	5233.4
1375	4751.4	5604.7	5254	5235.7
1376	4754.4	5606.8	5256.6	5238
1377	4756.2	5608.4	5258.9	5240.2
1378	4757.7	5611.9	5261.4	5242.6
1379	4758.2	5614.9	5263.4	5245.1
1380	4760.5	5616.6	5266	5247.3
1381	4762.7	5618.3	5269.1	5249.8
1382	4764.5	5620.6	5271.2	5252.1
1383	4766.3	5623	5273.8	5254.4
1384	4767.4	5626.4	5276.2	5256.7
1385	4769.6	5627.7	5278.3	5259
1386	4772	5629.8	5280.8	5261.4
1387	4774.3	5632.2	5283.1	5263.6
1388	4775.8	5633.9	5285.6	5265.9
1389	4777.5	5636.8	5287.9	5268.3
1390	4779.7	5639.2	5290.3	5270.7
1391	4782.2	5641.1	5292.6	5273.1
1392	4783.7	5644.2	5295.2	5275.4
1393	4785.7	5646.7	5297.4	5277.7
1394	4787.2	5649.3	5299.7	5280.1
1395	4789.3	5651.8	5302	5282.2
1396	4791.9	5654.9	5304.3	5284.5
1397	4793.4	5658.7	5306.7	5286.9
1398	4796.1	5662.1	5309.3	5289.2
1399	4797.3	5665.1	5311.3	5291.5
1400	4798.8	5669	5312.8	5293.8
1401	4803.7	5670	5315.5	5296.2
1402	4809.8	5670.5	5317.7	5298.5
1403	4813.7	5671.6	5320	5300.8
1404	4816.9	5672.1	5322.1	5303
1405	4819.4	5672.6	5324.4	5305.3
1406	4824.4	5673.4	5326.8	5307.6
1407	4829.5	5674.5	5329.3	5310
1408	4833.8	5675.9	5331.4	5312.2
1409	4836.9	5677.2	5333.4	5314.5
1410	4840.9	5678.2	5335.7	5316.8
1411	4845.2	5679.7	5337.9	5319.2
1412	4851.4	5680.2	5340.2	5321.6
1413	4854.9	5681.4	5342.3	5323.8
1414	4858.9	5682.6	5344.7	5326.2
1415	4862.6	5683.4	5347	5328.5
1416	4865.9	5684	5349.9	5330.8
1417	4869.3	5685.1	5351.8	5333
1418	4872.4	5685.8	5353.9	5335.3
1419	4876.6	5686.3	5356.4	5337.6
1420	4879.6	5687.5	5358.6	5339.8
1421	4882.3	5688	5360.7	5342.1
1422	4886.4	5688.8	5362.6	5344.3
1423	4890.5	5689.9	5364.9	5346.6
1424	4893.4	5691	5367.4	5348.9
1425	4896.3	5691.8	5369.7	5351.2
1426	4900.7	5692.6	5371.9	5353.4
1427	4904.2	5693.5	5374.2	5355.7
1428	4906.5	5694.7	5376.6	5358
1429	4910.3	5695.1	5378.6	5360.3
1430	4913.6	5696.1	5381.2	5362.6
1431	4916.6	5697.4	5383.5	5364.9
1432	4920	5698.6	5385.7	5367.1
1433	4922.7	5698.7	5387.9	5369.4
1434	4925.5	5699.5	5390.6	5371.7
1435	4927.8	5700.9	5393.1	5374
1436	4931.5	5702	5395.2	5376.5
1437	4935.4	5703.8	5397.3	5378.7
1438	4937.5	5705.1	5399.8	5381
1439	4941.3	5706.5	5402.1	5383.3
1440	4944.4	5707.1	5404.3	5385.4
1441	4947.6	5707.8	5406.7	5387.7
1442	4950.9	5709.4	5408.9	5390
1443	4954.4	5710.3	5411.4	5392.3
1444	4956.4	5711.9	5413.9	5394.8
1445	4959.4	5713.5	5416.4	5397
1446	4962.5	5714.6	5419.1	5399.4
1447	4964.1	5716.2	5421.3	5401.5
1448	4966.1	5717.2	5423.6	5403.7
1449	4969.9	5718.7	5425.6	5406
1450	4971.8	5720.7	5428.1	5408.3
1451	4974.4	5722.2	5430.6	5410.6
1452	4976.5	5723	5433	5412.9
1453	4979.1	5723.7	5435.6	5415.2
1454	4981.5	5724.7	5437.6	5417.4
1455	4984.2	5725.9	5439.8	5419.7
1456	4985.5	5726.8	5442.5	5422
1457	4987.5	5728.6	5445.3	5424.3
1458	4990.5	5730.2	5447.7	5426.7
1459	4991.2	5731.2	5449.6	5428.8
1460	4994.7	5732.5	5451.7	5431
1461	4996.3	5734.6	5453.5	5433.2
1462	4998.8	5735.7	5456.3	5435.6
1463	5000.2	5737.4	5458.7	5437.9
1464	5003.4	5739.7	5461	5440.2
1465	5005.4	5742.3	5463.5	5442.6
1466	5007.8	5744.9	5465.6	5444.9
1467	5009.4	5744.7	5468.2	5447.3
1468	5011.1	5745.8	5470.5	5449.4
1469	5012.8	5747.4	5472.8	5451.5
1470	5014.9	5747.8	5475	5453.7
1471	5016.8	5749.3	5477.4	5455.9
1472	5019.1	5751.9	5479.7	5458.3
1473	5021.1	5753.7	5481.8	5460.5
1474	5023.2	5754.7	5484	5462.7
1475	5025.2	5757.1	5486.4	5465
1476	5025.4	5759.8	5488.6	5467.2
1477	5028.2	5761.8	5490.6	5469.3
1478	5030.7	5763	5493.8	5471.7
1479	5033.1	5765.5	5496.4	5474
1480	5034.1	5768.1	5498.7	5476.2
1481	5036.9	5768.6	5501	5478.5
1482	5037.9	5769.2	5503.6	5480.8
1483	5040	5772.2	5505.9	5483.1
1484	5041.4	5774.4	5508.4	5485.3
1485	5042.5	5777.3	5510.8	5487.6
1486	5044.1	5780.4	5513.1	5490
1487	5046.7	5782.7	5515.4	5492.3
1488	5047.8	5785.1	5518	5494.6
1489	5049.3	5788	5520.3	5496.9
1490	5051.7	5791.2	5523	5499.3
1491	5053.8	5793.8	5525.2	5501.5
1492	5055.7	5796.3	5527.8	5503.8
1493	5057.8	5798.8	5529.8	5506.1
1494	5059	5800.7	5532	5508.3
1495	5061.8	5802.8	5534.4	5510.5
1496	5062.7	5805.8	5536.4	5512.6
1497	5065.1	5807.9	5538.9	5515
1498	5066.2	5810.8	5540.9	5517.2
1499	5067.1	5813.3	5543.2	5519.3
1500	5067.4	5815.6	5545.6	5521.5
1501	5069	5816.9	5547	5522.8
1502	5069.9	5818	5548.2	5524.1
1503	5071.2	5819	5549.9	5525.5
1504	5073	5819.7	5551	5526.7
1505	5075.5	5820.3	5552.4	5528
1506	5077.3	5820.9	5553.6	5529.3
1507	5079.5	5822.2	5555	5530.6
1508	5081.7	5823.2	5556.3	5531.9
1509	5084.5	5824.2	5557.5	5533.2
1510	5085.3	5825.6	5558.8	5534.4
1511	5086.6	5826.3	5559.7	5535.6
1512	5088.1	5827.8	5561.2	5536.9
1513	5090.6	5828.9	5562.6	5538.3
1514	5091.9	5830	5563.5	5539.5
1515	5094.3	5831	5564.5	5540.7
1516	5094.6	5832.5	5565.6	5541.9
1517	5097.8	5834.1	5566.2	5543
1518	5099.6	5835.5	5567.9	5544.5
1519	5101.5	5836.5	5569	5545.8
1520	5102.3	5837.5	5570.1	5547
1521	5104.1	5838.3	5571	5548.2
1522	5105	5839.9	5572.5	5549.5
1523	5107.1	5841.1	5573.7	5550.7
1524	5109.2	5842	5574.8	5551.9
1525	5110.7	5842.9	5576.2	5553.2
1526	5111.3	5844	5577.5	5554.6
1527	5113.3	5845	5579	5555.9
1528	5114.9	5846.2	5580.4	5557.3
1529	5116.2	5847.2	5581.7	5558.5
1530	5117.9	5848	5583	5559.8
1531	5118.3	5849.7	5584.3	5561.1
1532	5119.4	5851.2	5585.5	5562.4
1533	5121.4	5852.4	5586.6	5563.7
1534	5123.5	5853	5587.6	5564.9
1535	5125.6	5854.7	5588.5	5566.2
1536	5127.4	5855.5	5589.7	5567.3
1537	5128.6	5857.1	5591.1	5568.6
1538	5129.4	5858.8	5592.6	5569.9
1539	5131.4	5860.3	5593.6	5571.2
1540	5133.6	5862.2	5594.9	5572.5
1541	5134.9	5863.2	5595.7	5573.6
1542	5136.1	5864.6	5596.9	5574.9
1543	5138.9	5866.3	5598.5	5576.2
1544	5141.9	5866.9	5600	5577.6
1545	5142.1	5868.2	5600.9	5578.8
1546	5143.2	5869.5	5602	5580
1547	5143.9	5871.3	5603.2	5581.3
1548	5144.4	5872.7	5604.5	5582.5
1549	5145.6	5873.9	5605.9	5583.8
1550	5147.8	5875.1	5607.3	5585.1
1551	5149.4	5877.2	5608.4	5586.5
1552	5150.2	5879.6	5609.1	5587.7
1553	5152.3	5881.2	5610.3	5589.1
1554	5153.6	5882.8	5611.6	5590.3
1555	5155.8	5884.1	5612.8	5591.7
1556	5157.3	5885.2	5614	5593
1557	5159.9	5887	5615.1	5594.2
1558	5161.8	5888.8	5616	5595.5
1559	5163.1	5890.5	5617.4	5596.8
1560	5164.3	5892.9	5618.4	5598
1561	5166.1	5894.7	5619.8	5599.4
1562	5167.8	5895.8	5621.1	5600.7
1563	5168.8	5897.8	5622.1	5602
1564	5168.1	5899.3	5623.2	5603.3
1565	5169.9	5900.7	5624.2	5604.5
1566	5171	5901.7	5625.3	5605.6
1567	5171.5	5904.2	5626.3	5606.9
1568	5172.6	5905.6	5627.7	5608.1
1569	5173.6	5906.9	5629.1	5609.4
1570	5175.3	5908.7	5630.2	5610.7
1571	5176.8	5910.8	5631.5	5612
1572	5177.8	5912.8	5632.6	5613.3
1573	5179.1	5914.6	5633.7	5614.6
1574	5180.3	5916.8	5635	5615.9
1575	5181.3	5918.9	5636.1	5617.3
1576	5182.3	5920.7	5637.2	5618.5
1577	5183.8	5922.4	5638.4	5619.7
1578	5184.7	5923.9	5639.6	5621
1579	5186.2	5926	5640.7	5622.3
1580	5188	5928.1	5642	5623.5
1581	5189.7	5929.6	5643	5624.8
1582	5191.5	5931.8	5644.3	5626.2
1583	5192.4	5933.7	5645.5	5627.5
1584	5193.8	5935.4	5646.9	5628.8
1585	5194.2	5937.1	5647.8	5630.1
1586	5196.7	5939.2	5649.2	5631.3
1587	5198.2	5941.3	5650.5	5632.6
1588	5200.2	5943.5	5652.1	5634
1589	5201.2	5946.2	5653.2	5635.3
1590	5202.9	5948	5653.9	5636.7
1591	5205.1	5949.5	5654	5637.9
1592	5207	5951	5654.7	5639.1
1593	5207.7	5953.5	5655.9	5640.3
1594	5208.3	5956	5657.2	5641.6
1595	5208.6	5958.5	5658.2	5642.8
1596	5209.7	5960.8	5659.4	5644.1
1597	5210.8	5963.5	5660.6	5645.4
1598	5212.1	5966.1	5661.6	5646.7
1599	5213.1	5968	5662.7	5647.9
1600	5212.7	5970.4	5663.6	5649.2
1601	5216	5971.7	5665	5650.5
1602	5218.5	5972.7	5666.1	5651.7
1603	5220.3	5973.8	5667.5	5653
1604	5221.2	5975	5668.6	5654.3
1605	5223.4	5976.6	5669.8	5655.6
1606	5224.3	5977.6	5671.4	5656.9
1607	5226.2	5977.8	5672.5	5658.2
1608	5227.8	5978.7	5673.7	5659.5
1609	5230.4	5980.4	5674.6	5660.6
1610	5232.2	5981.2	5676.1	5661.9
1611	5232.9	5982.5	5677.4	5663.2
1612	5234.6	5984	5678.8	5664.4
1613	5236.7	5984.9	5680.1	5665.6
1614	5239.6	5985.8	5681.4	5666.8
1615	5242.5	5986.9	5682.6	5668.1
1616	5244.3	5988	5683.7	5669.4
1617	5245.9	5989.4	5685.1	5670.7
1618	5246.2	5990.6	5686.4	5672
1619	5248.4	5991.7	5687.6	5673.4
1620	5250	5993.5	5688.8	5674.7
1621	5250.8	5994.2	5690	5675.8
1622	5252.5	5995.2	5691.3	5677
1623	5254.1	5996	5692.7	5678.3
1624	5257.1	5997.6	5694	5679.6
1625	5258.8	5999	5695.3	5680.8
1626	5259.9	6000.8	5696.4	5682
1627	5260.9	6001	5697.4	5683.1
1628	5262.2	6003.1	5698.7	5684.5
1629	5264.2	6004.4	5699.9	5685.8
1630	5266	6005.5	5700.9	5687
1631	5267.9	6007	5702.1	5688.4
1632	5268.7	6008.2	5703	5689.5
1633	5272.2	6010.2	5704.2	5690.8
1634	5274.3	6011	5705.1	5692.1
1635	5276	6012.1	5706.6	5693.3
1636	5277.2	6012.9	5707.8	5694.6
1637	5279.1	6015	5708.9	5695.8
1638	5280.5	6016.5	5710.3	5697.1
1639	5282.7	6018	5711.3	5698.4
1640	5283.9	6019.5	5712.4	5699.6
1641	5285.8	6020.9	5713.5	5700.8
1642	5287.2	6022	5714.6	5702.1
1643	5289.1	6023.8	5715.9	5703.3
1644	5290.8	6025	5717.1	5704.6
1645	5291.5	6025.6	5718.2	5705.8
1646	5292.3	6027.9	5719	5707.1
1647	5293.6	6028.5	5720.4	5708.3
1648	5296	6030.1	5721.5	5709.6
1649	5297.6	6031.5	5722.7	5710.8
1650	5299.4	6032.7	5723.8	5712.1
1651	5300	6033.6	5725.1	5713.4
1652	5302.9	6035.1	5726	5714.7
1653	5304.4	6036.2	5727.1	5715.9
1654	5305.4	6037.9	5728.2	5717.1
1655	5306.7	6040.1	5729.4	5718.4
1656	5307.9	6042.2	5730.5	5719.6
1657	5309.1	6044.2	5731.6	5721
1658	5311.3	6046.2	5732.8	5722.3
1659	5312	6048.2	5734	5723.5
1660	5313.4	6049.2	5735.2	5724.9
1661	5314	6051	5736.3	5726
1662	5315.8	6053	5737.4	5727.3
1663	5317.9	6054.9	5738.2	5728.7
1664	5319	6056.2	5739.5	5729.8
1665	5319.9	6057.7	5740.4	5731.1
1666	5320.8	6059.2	5741.4	5732.4
1667	5321.7	6061.3	5742.4	5733.7
1668	5322.7	6062.5	5743.4	5734.8
1669	5323.1	6064.7	5744.7	5736.1
1670	5322.7	6066.3	5745.8	5737.2
1671	5323.4	6068.5	5747.1	5738.5
1672	5323.9	6069.9	5748.1	5739.6
1673	5324.6	6071.9	5749.5	5740.9
1674	5326.6	6073.6	5750.4	5742.1
1675	5328.1	6075.3	5751.8	5743.4
1676	5329.7	6076.1	5752.9	5744.5
1677	5330.7	6078.3	5754.2	5745.8
1678	5331.4	6080.6	5755.3	5747.1
1679	5332.8	6082	5756.3	5748.2
1680	5333.7	6084.2	5757.5	5749.5
1681	5334.9	6085.8	5758.6	5750.7
1682	5335.7	6086.7	5759.8	5752
1683	5337	6089.4	5761.1	5753.3
1684	5338	6091.6	5762.6	5754.7
1685	5339.3	6093.8	5763.7	5755.9
1686	5340.5	6095.9	5764.8	5757.2
1687	5341.3	6097.7	5765.7	5758.4
1688	5342	6099	5766.6	5759.6
1689	5343.3	6102.5	5767.8	5761
1690	5344.7	6105.1	5769	5762.3
1691	5346.2	6106.1	5770.7	5763.5
1692	5347.6	6107.5	5771.8	5764.7
1693	5348.3	6110.5	5772	5765.8
1694	5349.4	6112.9	5772.9	5767.1
1695	5348.7	6115.9	5773.8	5768.3
1696	5350	6118.4	5774.7	5769.5
1697	5350.6	6119.2	5776.4	5770.6
1698	5352.6	6121.3	5777.6	5771.9
1699	5353.7	6122.7	5778.9	5773.2
1700	5354.6	6126.8	5780.1	5774.3
1701	5355.9	6127.5	5781.4	5775.6
1702	5357.8	6128.5	5782.6	5776.9
1703	5358.9	6128.7	5783.8	5778.1
1704	5361.1	6129.7	5785.1	5779.3
1705	5362.5	6130.8	5786.6	5780.5
1706	5365.1	6131.6	5787.7	5781.9
1707	5366.1	6132.5	5788.8	5783.1
1708	5368.4	6133.2	5789.9	5784.4
1709	5370.8	6133.7	5790.9	5785.6
1710	5373.6	6134.3	5791.9	5786.8
1711	5374.6	6134.8	5793.4	5788.1
1712	5376.2	6135.9	5794.6	5789.4
1713	5378.3	6137.1	5795.9	5790.6
1714	5380.5	6138.1	5797.7	5791.9
1715	5383.1	6139.5	5798.9	5793.1
1716	5384.5	6139.9	5799.9	5794.3
1717	5386.2	6141	5801.2	5795.6
1718	5388.3	6141.7	5802.2	5796.8
1719	5389.8	6142.1	5803.4	5798.1
1720	5390.8	6142.4	5804.7	5799.3
1721	5393.4	6143.4	5805.9	5800.6
1722	5396	6145.1	5806.8	5801.8
1723	5397.8	6145.9	5808	5803.1
1724	5399.7	6146.6	5809.1	5804.4
1725	5402.7	6148.1	5810.1	5805.7
1726	5404.7	6149.2	5811.5	5807
1727	5406.7	6150.4	5812.9	5808.3
1728	5408.9	6151.9	5814.4	5809.6
1729	5410	6152.7	5815.5	5810.8
1730	5411.7	6153.4	5816.7	5812
1731	5413.2	6154.5	5817.8	5813.3
1732	5414.9	6155.4	5819	5814.5
1733	5417.1	6156.7	5820.4	5815.8
1734	5418.9	6157	5821.3	5817.1
1735	5420.9	6157.5	5822.4	5818.3
1736	5423.4	6158.2	5823.7	5819.5
1737	5425.3	6159.7	5824.9	5820.7
1738	5427.2	6160.6	5826.1	5822
1739	5429.3	6161.2	5827.2	5823.2
1740	5430.7	6162.5	5828.5	5824.5
1741	5432.1	6163.6	5829.8	5825.9
1742	5433.8	6164.9	5830.9	5827.2
1743	5434.7	6165.2	5832.2	5828.5
1744	5435.7	6167	5833.3	5829.7
1745	5436.7	6168.4	5834.7	5831
1746	5437.4	6169	5836.1	5832.3
1747	5439.3	6170.6	5837.1	5833.5
1748	5440.8	6172.6	5838.3	5834.7
1749	5442.7	6173.5	5839.5	5836
1750	5444.3	6174.7	5841	5837.2
1751	5445.7	6176	5842.1	5838.3
1752	5446.8	6177.6	5843.4	5839.6
1753	5449.4	6179.2	5844.5	5840.9
1754	5450.6	6180.4	5845.6	5842.2
1755	5451.6	6181.8	5846.9	5843.5
1756	5452.8	6183.1	5848.2	5844.7
1757	5455	6184.4	5849.2	5845.9
1758	5456.8	6186.6	5850.4	5847.2
1759	5458.8	6189.1	5851.7	5848.5
1760	5460.3	6190.1	5852.5	5849.8
1761	5462.3	6191.6	5853.7	5851.1
1762	5463.6	6192.6	5855.1	5852.3
1763	5465.1	6193.5	5856.5	5853.5
1764	5466.9	6195	5857.4	5854.7
1765	5467.9	6195.6	5858.8	5856
1766	5469.6	6197.6	5859.8	5857.3
1767	5471.5	6199.5	5861.1	5858.6
1768	5472.3	6201.6	5862.4	5859.9
1769	5474	6203.8	5863.3	5860.9
1770	5475.6	6205.3	5864.5	5862.2
1771	5477.6	6207.6	5865.7	5863.4
1772	5479.2	6209.3	5866.8	5864.6
1773	5480.6	6210.1	5867.7	5865.8
1774	5481.5	6212.4	5868.9	5867.1
1775	5482.8	6214.5	5869.9	5868.3
1776	5484.7	6215.4	5871.1	5869.7
1777	5485.7	6216.8	5872.2	5870.9
1778	5488	6217.3	5873.5	5872.3
1779	5488.5	6219.2	5874.6	5873.5
1780	5490.1	6221.2	5875.9	5874.8
1781	5490.9	6223.4	5877.2	5876
1782	5492.5	6225.1	5878.3	5877.2
1783	5493	6225.9	5879.6	5878.5
1784	5494.1	6228.3	5880.8	5879.7
1785	5496.3	6229.6	5881.9	5880.9
1786	5497.8	6231.4	5883.2	5882.2
1787	5499.7	6233.3	5884.3	5883.5
1788	5501.4	6235.9	5885.6	5884.5
1789	5502.7	6236.8	5886.8	5885.8
1790	5504	6238.6	5888.1	5887
1791	5505.5	6240.4	5889.2	5888.2
1792	5505.7	6243.9	5890.2	5889.3
1793	5506.3	6246.2	5891.9	5890.6
1794	5508	6248.5	5893.4	5892.1
1795	5509.4	6249.2	5894.2	5893.2
1796	5510	6251.7	5894.9	5894.4
1797	5511.4	6253.5	5896	5895.7
1798	5513.5	6254.9	5897.4	5897
1799	5514.2	6256.2	5898.4	5898.1
1800	5515.6	6258.4	5899.4	5899.3
1801	5517.6	6259.3	5900.5	5900.5
1802	5519.8	6260.6	5901.5	5901.7
1803	5521.5	6261.5	5902.8	5903
1804	5523.3	6262.4	5904	5904.2
1805	5524	6263.8	5905.3	5905.4
1806	5526.2	6264.2	5906.3	5906.7
1807	5528.3	6265.1	5907.4	5907.9
1808	5529.9	6265.1	5908.6	5909.2
1809	5531.1	6265.6	5909.9	5910.5
1810	5533.1	6266.5	5911.4	5911.8
1811	5534.8	6267	5912.6	5913.1
1812	5536.5	6268.2	5914	5914.5
1813	5539.6	6269.3	5915.3	5915.8
1814	5541.5	6271.6	5916.5	5917
1815	5542.4	6273	5917.7	5918.4
1816	5542.9	6273.9	5918.9	5919.6
1817	5545	6274.7	5919.9	5920.8
1818	5546.9	6275.3	5921.1	5922.1
1819	5548.7	6275.3	5922.1	5923.4
1820	5551.7	6276.4	5923.2	5924.6
1821	5553.2	6277.7	5924.4	5925.9
1822	5555.4	6277.8	5925.5	5927.1
1823	5557.2	6279.4	5927	5928.6
1824	5559.3	6280.6	5928.1	5929.8
1825	5561.2	6281.5	5929.4	5931.1
1826	5562.6	6283.4	5930.9	5932.4
1827	5563.5	6284.6	5932.2	5933.6
1828	5564.6	6286.1	5933.2	5934.8
1829	5566.3	6287.2	5934.5	5936.1
1830	5568.6	6288.5	5935.6	5937.4
1831	5570.6	6290.2	5937	5938.8
1832	5571.7	6291.9	5938.5	5940.1
1833	5573	6294	5939.9	5941.4
1834	5574.3	6295.5	5941.2	5942.6
1835	5576.9	6297	5942.3	5943.8
1836	5577.7	6298.3	5943.6	5945.1
1837	5580	6299.6	5944.8	5946.4
1838	5581.7	6300.4	5945.8	5947.7
1839	5582.8	6301.7	5947.1	5949
1840	5584.7	6303.7	5948.5	5950.2
1841	5586.2	6305.5	5949.9	5951.5
1842	5588.2	6307.1	5951.2	5952.9
1843	5589.9	6308.8	5952.3	5954.1
1844	5591.9	6310.1	5953.3	5955.3
1845	5593.4	6310.7	5954.5	5956.5
1846	5594.4	6311.7	5955.7	5957.8
1847	5596.7	6313.4	5956.5	5959
1848	5598.9	6314.5	5957.5	5960.2
1849	5599.9	6314.9	5958.8	5961.4
1850	5601.4	6315.7	5960.2	5962.6
1851	5603.1	6317.4	5961.2	5963.9
1852	5604.3	6319.1	5962.3	5965.1
1853	5605.5	6320.8	5963.6	5966.4
1854	5607.4	6322.3	5964.5	5967.6
1855	5608.6	6324.4	5965.8	5968.8
1856	5610.3	6325.6	5967.1	5970.1
1857	5611.9	6327.4	5968.6	5971.4
1858	5613.6	6328.4	5969.8	5972.7
1859	5615.3	6329.5	5971	5973.9
1860	5615.5	6331.7	5972.3	5975.3
1861	5617.4	6334.2	5973.6	5976.5
1862	5618.5	6335.7	5974.6	5977.8
1863	5619.3	6337.1	5975.8	5979.2
1864	5620.6	6338.3	5977.2	5980.5
1865	5621.3	6340.4	5978.3	5981.7
1866	5623	6342.3	5979.6	5983
1867	5624.8	6343.5	5980.5	5984.3
1868	5626.2	6344.7	5981.9	5985.5
1869	5627.5	6346.7	5983.2	5986.8
1870	5628.5	6347.7	5984.1	5988
1871	5630.2	6349.2	5985.4	5989.3
1872	5631.5	6350.5	5986.5	5990.6
1873	5633.1	6352.2	5987.7	5991.7
1874	5634.8	6353.8	5988.9	5993
1875	5636.5	6356.1	5990.4	5994.1
1876	5637.2	6356.6	5991.4	5995.3
1877	5637.9	6357.7	5992.3	5996.5
1878	5639.1	6360.8	5993.7	5998
1879	5639.7	6362.9	5994.7	5999.2
1880	5641.7	6365.3	5995.6	6000.5
1881	5643.4	6367.2	5997	6001.9
1882	5644.4	6368.8	5998.5	6003.3
1883	5645.6	6369.4	5999.7	6004.4
1884	5647.6	6370.5	6001.2	6005.9
1885	5649.9	6372.4	6002.3	6007.1
1886	5651.8	6374.3	6003.6	6008.3
1887	5654.6	6375.9	6004.6	6009.5
1888	5654.4	6377.4	6005.3	6010.6
1889	5655	6379.8	6006.8	6011.8
1890	5655.8	6382.1	6007.8	6013.1
1891	5656.9	6384.6	6008.4	6014.2
1892	5657.7	6385	6009.8	6015.4
1893	5658.6	6386.9	6011.3	6016.8
1894	5660.2	6387.7	6012.3	6018
1895	5661.8	6388.7	6013.6	6019.2
1896	5662.4	6391.3	6014.8	6020.6
1897	5663.8	6393.1	6016.4	6021.9
1898	5665.6	6395	6017.9	6023.1
1899	5666.9	6397.2	6018.7	6024.4
1900	5669.3	6399.4	6019.8	6025.6
1901	5670.9	6401.2	6021.3	6027
1902	5673	6402	6022.4	6028.2
1903	5675.1	6402.6	6024	6029.6
1904	5676.3	6403	6024.8	6030.7
1905	5678.9	6404.5	6025.8	6031.9
1906	5680.3	6405.3	6027.3	6033.2
1907	5683.3	6406.6	6028.9	6034.5
1908	5685.7	6407.1	6029.7	6035.7
1909	5686.4	6408.5	6030.8	6036.9
1910	5687.6	6410	6031.7	6038.1
1911	5689.5	6411	6033	6039.4
1912	5689.7	6411.8	6034.4	6040.8
1913	5691.8	6411.5	6035.1	6041.9
1914	5694.2	6411.3	6036.4	6043.1
1915	5696.3	6412.7	6037.9	6044.4
1916	5699.2	6413.4	6039.2	6045.7
1917	5700.5	6414.7	6039.8	6046.9
1918	5703.3	6416.5	6041.2	6048.1
1919	5706.2	6417.8	6042.8	6049.3
1920	5708.7	6419	6043.8	6050.7
1921	5710.7	6420.5	6045.1	6052
1922	5712.1	6421.8	6046.2	6053.4
1923	5712.8	6423.4	6047.6	6054.6
1924	5714.8	6424.5	6048.7	6055.9
1925	5717.2	6424.9	6050	6057.1
1926	5717.7	6427.3	6051	6058.3
1927	5718.9	6428.8	6052.1	6059.6
1928	5721.2	6430	6053.8	6060.9
1929	5722.7	6431.7	6054.8	6062.1
1930	5725.4	6432.3	6055.8	6063.4
1931	5727	6434.2	6057	6064.8
1932	5728.6	6435.5	6058.5	6066
1933	5731	6436.7	6059.8	6067.3
1934	5732.9	6438.8	6061	6068.6
1935	5733.9	6437.7	6062.2	6069.9
1936	5735.6	6438.4	6063.6	6071.2
1937	5736.5	6441	6064.8	6072.3
1938	5738.7	6442.3	6065.9	6073.5
1939	5740.8	6442.5	6067.1	6074.7
1940	5742.4	6444.4	6068.2	6076
1941	5743.1	6445.5	6069.4	6077.3
1942	5743.6	6445.2	6070.6	6078.7
1943	5745.2	6446	6072	6080
1944	5746.6	6447.2	6073.3	6081.2
1945	5748.6	6447.6	6074.2	6082.5
1946	5749.9	6448.5	6075.1	6083.8
1947	5751.7	6449.2	6076.2	6085
1948	5752.8	6451.4	6077.2	6086.3
1949	5754.4	6453	6078.5	6087.5
1950	5756.2	6453.9	6080	6088.8
1951	5757.8	6455.5	6081.4	6090
1952	5758.9	6458.2	6082.5	6091.3
1953	5760.1	6460.4	6083.6	6092.6
1954	5761.7	6462.4	6084.8	6093.8
1955	5763	6463.6	6086.1	6095.1
1956	5764.2	6465.3	6087.2	6096.3
1957	5765.3	6466.8	6088.3	6097.6
1958	5766.9	6468.2	6089.5	6098.9
1959	5768.9	6469.9	6090.7	6100.2
1960	5770.6	6470.6	6091.8	6101.4
1961	5771.9	6471.5	6093	6102.7
1962	5773.5	6472.3	6094.3	6104
1963	5774.3	6474.4	6095.7	6105.2
1964	5776.4	6475.6	6097	6106.5
1965	5777.5	6477.2	6098.3	6107.9
1966	5779.4	6478.9	6099.5	6109.1
1967	5780.4	6481.7	6100.8	6110.5
1968	5782.4	6483.2	6102.1	6111.9
1969	5783.6	6483.9	6103.2	6113.1
1970	5784.6	6485.3	6104.5	6114.4
1971	5785.9	6486.2	6105.9	6115.7
1972	5787.5	6487.5	6107.1	6116.9
1973	5788.5	6489.3	6108.4	6118.2
1974	5789.7	6490.8	6109.6	6119.5
1975	5790.9	6492.1	6110.9	6120.8
1976	5792.6	6493.9	6112.2	6122
1977	5793.6	6495.3	6113.3	6123.4
1978	5794.7	6497.5	6114.7	6124.6
1979	5796	6500.1	6116	6125.9
1980	5796.5	6501.6	6117.2	6127.2
1981	5797.6	6502.9	6118.3	6128.4
1982	5798.8	6504.7	6119.7	6129.8
1983	5799.7	6507.6	6120.9	6131
1984	5801.6	6508.7	6122.2	6132.4
1985	5802.8	6511.2	6123.3	6133.7
1986	5805	6513	6124.7	6134.8
1987	5806	6515.1	6125.9	6136.1
1988	5806.9	6516.6	6127.3	6137.4
1989	5809	6518.3	6128.4	6138.8
1990	5809	6519.2	6129.8	6140.1
1991	5811	6521.9	6131.4	6141.4
1992	5812.3	6524.5	6132.6	6142.7
1993	5813.8	6525.7	6133.8	6144
1994	5814.9	6526.2	6134.9	6145.1
1995	5816.6	6527.8	6136.1	6146.4
1996	5817.3	6529.7	6137.1	6147.7
1997	5817.9	6533.3	6138.3	6149
[truncated: 2,001 more rows]
